# Supplementary material for: EphA7 promotes myogenic differentiation via cell-cell contact
Source: eLife. 2020 Apr 21;9:e53689. doi: 10.7554/eLife.53689 (PMC7173967; doi:10.7554/eLife.53689)
Supplement: Figure 1—source data 1. [file elife-53689-fig1-data1.xlsx]

## Sheet: Sheet1
Adjusted for background- Background subtration eMyHC= 0.723 EPHA7= 7.979
uninj			3dpi			5dpi			7dpi			10dpi			16dpi			21 dpi
eMyHC	EPHA7		eMyHC	EPHA7		eMyHC	EPHA7		eMyHC	EPHA7		eMyHC	EPHA7		eMyHC	EPHA7		eMyHC	EPHA7			uninj	3 dpi	5 dpi	7 dpi	10 dpi	16 dpi	21 dpi
0.106	-7.334		92.187	89.924		98.217	58.01		21.356	7.988		2.258	-0.768		0.81	0.675		0.322	-4.407		eMyHC-/EphA7-	100	0	0	0.544959	1.341	81.7978	99.4286
0.068	-7.209		20.477	33.995		33.344	30.876		15.244	4.218		4.335	3.194		0.925	-1.183		0.69	-2.604		eMyHC+/EphA7-	0	0	0	3.81471	32.3755	9.4382	0
0.044	-6.83		10.742	45.913		53.993	29.494		7.512	-2.233		0.265	-0.46		0.42	-2.786		1.015	-2.458		eMyHC+/EphA7+	0	100	100	95.9128	65.9004	7.19101	0
0.462	-7.221		18.204	26.463		58.772	29.055		43.58	25.597		15.877	10.309		4.307	0.96		0.573	-2.264		eMyHC-/EphA7+	0	0	0	0	0.383142	1.57303	0.571429
0.259	-7.59		27.247	99.724		50.509	22.093		24.099	10.94		0.35	-1.535		16.849	24.621		0.135	-3.784
0.402	-7.51		11.265	49.684		50.39	32.833		35.301	8.281		12.39	22.467		5.44	0.967		0.327	-3.032
1.372	-7.327		53.554	66.586		29.922	18.911		38.472	9.278		2.629	12.638		1.831	-0.472		0.181	-3.562
0.195	-7.462		15.924	40.2		106.724	51.316		19.468	14.917		2.436	14.531		0.573	-3.501		3.982	1.992
0.087	-7.259		52.588	115.13		41.668	20.559		32.143	16.007		0.501	2.229		5.103	1.717		0.131	-4.543
0.194	-7.062		32.732	56.501		43.304	17.702		13.604	18.987		19.532	13.702		8.436	0.908		0.097	-2.948
0.108	-7.229		42.416	58.718		68.185	59.283		19.147	14.818		8.665	12.138		7.438	10.192		0.392	-2.703
0.271	-7.104		112.493	109.276		67.652	29.572		27.023	4.275		6.242	11.305		22.515	13.263		0.42	-3.029
0.255	-7.582		94.739	89.15		120.393	63.031		21.448	17.345		5.306	1.951		68.273	158.76		-0.141	-4.177
0.146	-7.039		23.765	32.533		86.9	72.614		38.38	21.198		4.432	17.639		1.043	-1.644		0.399	-2.5
0.25	-7.015		12.655	46.274		56.394	31.299		47.934	18.286		5.045	3.511		0.374	-2.87		0.421	-3.272
0.406	-7.318		60.35	75.669		31.316	15.645		15.397	13.497		7.854	13.94		57.365	68.521		0.086	-3.39
0.144	-7.309		60.435	124.116		70.358	39.782		14.538	10.314		0.897	10.995		12.756	13.2		0.443	-3.514
0.023	-7.218		38.855	45.232		66.927	31.131		26.545	20.053		5.789	10.019		0.307	-2.638		0.678	-2.814
0.204	-7.63		36.862	54.883		81.42	69.522		4.849	9.57		7.244	22.977		1.487	0.688		0.297	-2.713
0.259	-7.341		10.757	46.739		107.079	52.248		22.918	16.901		5.511	20.312		7.617	-1.333		0.302	-1.868
0.025	-7.41		59.402	119.771		89.681	41.738		12.66	10.995		1	7.048		6.441	0.581		0.485	-2.377
0.098	-7.428		110.777	99.487		65.151	29.483		34.339	16.28		5.583	15.328		1.179	-2.46		0.393	-3.138
0.073	-7.301		96.69	83.532		70.48	29.493		31.27	15.325		10.435	44.077		1.669	0.78		0.716	-3.087
-0.045	-7.32		87.978	96.345		67.384	26.813		9.067	10.624		11.51	17.16		4.609	2.706		0.383	-4.335
0.081	-7.283		35.8	94.427		49.383	29.428		38.907	16.834		12.515	20.808		0.74	1.38		-0.08	-3.429
0.047	-7.437		20.981	38.086		36.468	41.131		56.813	37.046		2.185	16.731		0.729	-1.891		0.282	-2.866
0.105	-7.341		25.216	45.37		114.692	59.4		6.299	10.933		2.756	15.027		0.41	-1.659		0.104	-4.188
0.426	-7.234		66.874	66.599		46.453	16.428		17.311	10.101		1.646	10.814		71.286	97.877		0.535	-1.931
-0.045	-7.149		85.715	78.666		55.792	23.498		5.265	6.003		4.937	16.844		1.447	-2.101		0.289	-3.761
0.107	-7.188		24.127	37.931		62.32	31.564		17.066	10.3		8.239	17.665		0.532	-3.326		0.148	-4.2
-0.003	-7.382		135.154	61.805		53.139	29.373		17.422	18.204		2.373	19.256		6.903	2.199		0.264	-4.237
0.012	-7.526		62.629	55.362		46.923	19.41		18.4	18.748		0.698	4.69		19.485	9.566		0.277	-3.741
0.185	-7.394		32.871	75.349		53.351	20.455		16.351	16.838		4.085	14.85		0.3	-2.559		0.391	-3.348
0.442	-7.12		5.424	25.644		55.303	20.109		5.397	10.402		17.176	14.475		16.3	5.152		0.39	-4.242
-0.02	-7.335		67.332	85.883		59.374	33.756		2.026	10.231		11.499	21.201		0.381	-2.051		0.063	-3.996
0.253	-7.053		73.295	90.608		100.326	46.29		10.093	18.999		14.136	12.979		2.352	-0.818		0.327	-3.214
0.285	-7.287		45.677	73.104		71.12	33.677		9.895	-1.293		9.847	16.183		0.303	-2.862		1.675	-2.264
-0.005	-6.971		73.199	86.768		75.811	20.828		24.103	11.397		7.376	19.92		8.171	5.601		-0.318	-4.132
0.037	-7.388		24.182	39.051		33.394	24.125		4.852	13.406		10.177	23.218		1.929	-0.738		0.438	-3.807
0.509	-6.938		55.331	72.682		52.209	17.265		22.768	21.125		13.215	24.488		0.379	-2.917		0.645	-3.982
0.189	-7.509		34.57	67.972		58.911	26.812		14.232	15.754		20.352	35.754		0.39	-1.691		0.28	-0.773
0.018	-7.641		91.571	68.534		88.846	38.516		16.496	14.778		3.509	10.714		2.048	-1.174		0.41	-2.715
-0.035	-7.276		69.638	47.435		44.204	22.025		9.827	16.679		1.35	6.713		2.666	-2.543		0.217	-3.802
0.017	-7.301		37.817	78.241		61.233	27.679		13.408	15.733		7.092	26.871		0.235	-3.021		0.01	-3.788
0.13	-7.286		53.335	75.95		111.928	37.495		27.155	15.357		16.799	23.836		1.977	-1.192		0.198	-2.914
0.042	-7.003		29.905	56.323		81.933	32.714		9.529	15.565		1.534	6.275		0.409	-1.762		0.778	-4.09
0.202	-7.452		43.464	56.06		50.5	17.166		18.134	21.648		10.904	27.358		3.974	6.477		0.194	-3.852
0.207	-7.384		28.369	42.832		77.246	44.763		3.43	7.642		24.274	17.895		0.635	-2.517		-0.128	-4.455
-0.182	-7.324		58.43	61.783		60.469	29.032		7.027	10.962		12.802	10.027		0.413	-0.154		0.877	-3.678
0.042	-7.527		70.318	87.662		95.781	42.963		15.045	16.335		8.547	23.417		0.413	-3.532		-0.019	-4.283
0.318	-7.171		23.497	35.071		49.813	21.695		14.826	13.411		3.529	9.405		13.456	3.872		0.024	-4.248
0.136	-7.276		27.96	53.528		53.898	22.677		13.032	1.384		28.746	18.314		20.971	47.339		-0.331	-4.075
0.277	-7.518		49.814	48.971		63.931	26.781		11.335	14.175		5.626	8.956		0.216	-3.288		0.244	-3.565
-0.02	-7.364		45.695	89.446		46.87	24.328		14.21	8.508		1.093	3.67		0.309	-1.696		0.924	-2.998
0.152	-7.579		12.8	47.289		85.777	45.146		28.142	20.171		5.63	13.983		0.258	-2.953		0.113	-3.318
0.022	-7.624		69.804	57.768		89.238	50.892		3.805	7.005		3.488	13.252		0.42	-2.021		0.187	-3.741
-0.023	-7.313		30.287	44.211		46.591	19.855		20.728	15.775		0.48	1.887		0.496	-0.873		0.398	-4.622
-0.068	-7.035		23.516	51.223		35.967	10.828		24.032	6.273		13.385	13.065		0.249	-1.463		-0.075	-4.451
0.233	-7.565		48.604	64.18		88.03	36.595		12.599	13.878		6.787	9.138		5.821	0.907		0.153	-4.184
0.051	-7.247		34.061	52.518		48.025	61.868		13.478	7.885		7.121	17.851		3.311	-0.967		0.134	-3.973
0.035	-7.141					60.59	24.074		14.085	10.388		3.543	16.788		0.152	-2.749		0.326	-0.441
0.085	-7.024					50.759	24.267		18.451	12.448		20.895	22.679		0.375	-1.384		0.401	-2.868
0.102	-7.333					42.905	27.934		53.338	16.684		0.274	2.141		0.234	-2.043		0.433	-4.184
0.01	-7.547					65.522	43.773		6.115	9.345		13.747	26.817		32.046	3.285		0.011	-4.008
0.02	-7.574					47.387	27.416		14.445	8.974		2.523	10.761		0.037	-3.793		-0.02	-3.918
-0.036	-7.15					60.84	29.339		35.347	6.79		29.035	30.227		0.245	-2.952		0.381	-3.98
-0.03	-7.234					49.227	16.505		15.189	12.967		1.162	11.495		0.701	-2.659		0.158	-4.221
-0.323	-7.233					72.877	30.052		5.187	12.35		0.396	-0.098		0.29	-1.667		-0.074	-4.119
0.087	-7.337					82.929	26.684		15.731	19.96		8.509	15.09		1.062	-2.087		1.037	-3.006
0.163	-6.971					32.588	11.915		20.711	-0.077		5.198	17.223		0.68	-1.836		-0.081	-3.847
0.041	-7.126					72.258	47.171		11.511	-0.9		9.251	15.805		0.599	-1.479		-0.128	-4.288
0.129	-7.11					58.937	35.947		24.879	10.49		0.253	1.589		0.587	-3.103		0.026	-3.99
0.022	-7.279					74.644	35.677		14.086	17.684		3.451	15.422		-0.025	-2.708		0.063	-4.327
-0.071	-7.644					69.606	24.745		53.3	7.747		0.641	1.216		1.259	-1.916		-0.026	-3.466
-0.192	-7.461					66.455	22.52		20.181	20.039		0.95	10.107		0.735	-0.31		0.152	-4.341
0.139	-7.453					47.297	16.194		6.207	10.129		1.19	12.017		0.115	-3.055		0.762	-4.232
0.311	-7.418					62.254	27.099		17.467	14.074		4.757	17.187		1.277	-1.348		0.745	-1.414
-0.18	-6.854					51.057	20.067		26.895	10.017		3.137	16.194		1.697	0.05		0.144	-4.596
0.249	-7.586					50.35	19.494		10.264	17.382		0.678	6.271		0.373	-2.399		0.431	-4.31
-0.085	-7.236					76.523	37.755		7.228	7.71		9.647	35.438		0.223	-3.561		0.446	-4.431
0.079	-7.049					78.598	35.55		15.656	16.599		2.675	12.381		0.287	-2.046		0.417	0.531
-0.19	-7.071					77.761	35.277		10.18	-2.131		0.834	4.841		0.32	-3.497		-0.078	-4.679
0.115	-7.345					42.803	17.898		23.15	7.462		0.23	2.016		0.272	-1.333		0.301	-4.162
-0.172	-7.507					72.741	24.939		14.359	12.284		1.007	1.697		0.25	-2.781		-0.277	-4.495
-0.119	-7.261					46.498	19.89		10.564	8.947		0.719	4.18		0.11	-2.571		0.159	-3.999
0.337	-7.236					68.962	45.635		14.702	20.588		0.19	-0.413		1.367	1.32		1.613	0.398
-0.005	-7.718					59.718	20.054		3.324	6.269		0.004	-1.061		-0.012	-3.614		0.827	-3.478
0.009	-7.433					68.644	39.402		9.634	10.98		2.54	13.183		1.135	-0.577		0.414	-3.932
0.027	-7.158					65.336	24.75		13.051	12.624		14.222	23.888		1.139	-1.399		0.188	-2.2
-0.074	-7.381					33.638	8.874		7.1	5.338		0.248	0.621		0.06	-1.992		0.855	-3.527
-0.489	-7.006					88.071	49.645		9.138	1.188		22.507	21.789		-0.044	-2.793		0.384	-3.491
0.221	-7.246					69.491	27.262		14.916	18.188		3.531	17.033		0.572	-0.936		0.197	-4.077
-0.064	-7.231					100.64	37.667		10.752	10.913		0.391	1.09		0.072	-2.542		-0.023	-3.178
-0.118	-7.308					83.655	45.085		14.244	16.081		21.216	23.706		0.469	-3.421		0.16	-4.161
-0.067	-7.061					56.337	35.544		19.562	9.074		-0.022	1.19		0.298	-2.026		0.474	-1.325
-0.132	-7.148					52.609	23.946		12.653	6.035		0.947	6.884		0.78	-1.085		0.118	-4.639
0.02	-7.345					39.579	13.741		28.122	12.337		20.682	14.447		0.119	-1.915		-0.067	-3.884
-0.043	-6.919					60.923	30.723		8.496	9.995		4.661	12.908		1.025	-0.918		0.643	-3.427
-0.079	-7.175					33.867	10.978		19.568	6.107		1.086	7.081		0.196	-1.898		0.198	-3.002
-0.388	-7.367					42.619	17.248		17.911	9.958		0.084	-3.159		0.276	-1.353		0.227	-4.175
0.148	-7.241					46.293	17.994		6.618	8.559		0.195	1.897		0.329	-4.252		0.765	-4.012
-0.023	-7.238					82.475	62.564		28.722	7.483		6.687	30.977		0.491	-1.644		-0.091	-4.776
-0.334	-7.001					30.39	9.773		7.144	11.266		0.215	3.992		0.261	-1.204		0.545	-4.362
-0.083	-7.023					42.514	20.379		10.825	9.652		0.613	3.229		0.589	-0.795		0.5	-2.054
-0.081	-7.169					86.422	21.315		10.598	3.806		2.882	17.4		0.381	-2.573		0.222	-4.028
0.241	-7.436					35.616	11.725		14.338	14.081		5.374	14.7		0.399	-1.523		0.304	-3.969
-0.326	-6.794					76.289	22.522		9.04	9.766		2.249	14.752		0.105	-2.53		0.402	-4.3
-0.077	-7.054					80.569	47.14		15.699	11.635		6.153	13.79		0.243	-0.923		0.812	-3.686
0.036	-7.214					25.713	9.633		4.568	16.667		25.209	23.857		-0.052	-3.507		-0.086	-4.155
-0.01	-7.266					55.155	33.785		2.041	3.994		1.415	7.43		0.195	-3.019		1.043	-3.791
-0.035	-7.323					93.271	29.203		17.663	13.053		1.588	11.709		0.38	-2.004		0.014	-4.669
0.232	-7.331					39.998	17.558		6.674	11.268		3.664	14.931		0.276	-1.608		0.205	-3.844
0.11	-7.438					88.121	31.972		8.693	12.512		4.516	15.735		1.433	2.64		0.142	-4.17
0.217	-6.945					77.663	33.987		3.383	6.451		0.806	8.73		0.293	-1.551		0.358	-2.09
-0.089	-7.183					93.21	39.606		5.262	11.712		12.529	24.364		0.184	-2.674		-0.049	-4.564
-0.177	-7.151					60.616	43.393		17.332	13.012		1.997	7.772		0.787	-0.808		0.078	-4.439
-0.108	-7.261					82.724	27.388		14.242	6.969		2.068	10.714		0.546	-1.553		0.303	-4.173
-0.314	-6.997					35.924	10.492		6.159	10.155		17.936	41		0.26	-2.959		0.244	-4.433
-0.345	-7.471					112.25	56.024		18.2	11.724		3.051	18.546		0.433	-2.44		0.55	-3.926
-0.462	-6.85					45.612	22.524		4.035	3.449		2.852	8.324		-0.201	-1.408		-0.338	-4.588
-0.053	-7.205					26.404	39.122		5.748	12.216		27.935	29.784		0.565	0.302		0.106	-4.372
-0.181	-5.884					34.1	10.201		18.419	14.688		0.652	3.664		0.433	0.006		0.312	-2.923
-0.052	-7.319					58.793	38.867		7.491	6.402		0.981	4.251		0.145	-2.05		0.539	-1.223
-0.126	-7.212					60.763	30.93		11.503	10.001		6.473	17.199		1.894	-0.954		-0.279	-3.289
-0.078	-7.291					39.068	13.096		2.648	5.084		1.774	7.861		-0.069	-2.316		0.041	-1.317
0.192	-6.979					65.605	22.917		4.01	5.704		0.136	1.192		0.194	-0.953		0.485	-0.494
-0.057	-7.093					64.784	49.47		1.108	2.813		1.971	17.06		0.395	-2.751		0.695	-3.524
-0.385	-7.11					36.43	9.969		6.929	8.484		7.635	20.938		0.379	-0.029		0.33	-4.311
0.016	-7.22					71.883	23.067		12.693	6.537		0.062	-0.163		0.412	0.212		0.623	-4.375
-0.205	-6.985					69.908	20.148		14.431	10.112		-0.025	1.339		0.211	-1.119		-0.187	-4.83
-0.125	-7.339					37.12	8.822		6.012	14.016		0.172	0.896		0.604	-0.697		0.291	-1.504
-0.368	-7.627					56.428	22.674		14.422	14.965		0.001	3.63		-0.027	-3.078		0.31	-0.619
-0.237	-7.374					63.575	21.899		11.02	8.816		-0.395	2.16		0.086	-2.015		1.444	-4.634
-0.144	-7.239					35.546	11.178		5.574	10.254		2.565	13.619		0.798	-1.062		-0.203	-4.214
-0.271	-7.549					70.868	18.819		5.647	5.238		2.402	9.933		0.27	-1.31		0.702	-4.671
-0.154	-7.245					74.979	27.235		7.552	8.862		5.851	18.294		-0.044	-3.375		0.124	-3.98
-0.291	-7.244					67.743	17.478		3.791	5.524		0.26	0.769		0.374	-1.434		-0.311	-4.382
0.093	-7.007					54.36	18.262		7.956	7.26		3.53	15.228		0.39	-0.204		0.296	-4.187
-0.318	-7.24					39.44	15.182		2.614	11.087		2.577	7.811		0.205	-2.586		-0.012	-4.402
0.178	-7.427					49.516	17.97		7.495	6.199		0.26	1.22		0.159	-1.672		0.462	0.771
-0.293	-7.067					55.168	22.085		18.809	13.827		1.496	7.648		-0.226	-2.656		-0.204	-4.411
-0.127	-7.154					36.627	17.015		6.275	-3.361		0.276	1.148		0.102	-3.363		0.225	-2.638
-0.085	-7.214					44.073	19.863		3.556	7.222		1.136	9.793		0.094	-3.016		-0.149	-4.634
0.011	-7.117					34.421	14.982		6.051	10.435		0.326	-0.096		0.282	-0.837		-0.337	-4.612
-0.128	-7.446					59.633	28.869		29.499	18.748		0.235	-0.527		0.223	-2.54		-0.182	-4.413
-0.196	-7.169					47.659	16.803		3.035	6.983		0.14	-0.969		0.041	-2.582		-0.25	-4.295
-0.289	-7.064					77.749	23.029		3.681	5.67		6.504	17.983		0.457	-3.025		0.075	-2.675
-0.309	-7.163					40.801	18.409		36.021	13.977		1.219	8.99		0.338	-1.297		0.189	-3.142
-0.089	-7.152					26.436	7.279		16.811	10.672		0.163	1.229		0.297	-0.786		0.318	-4.342
-0.171	-7.279					28.691	10.571		5.966	14.93		0.275	2.051		0.366	-1.156		0.741	-1.269
-0.33	-7.112					48.39	14.245		7.874	8.738		-0.001	0.06		0.401	-0.507		-0.083	-4.688
-0.075	-7.146					39.398	15.472		19.227	21.507		-0.078	-1.667		0.829	-0.739		-0.27	-4.437
-0.062	-7.202					41.669	18.202		2.293	2.769		0.28	0.427		-0.075	-1.862		-0.131	-4.872
0.015	-7.581					30.988	12.586		6.032	9.835		-0.164	-1.604		0.276	-1.595		0.412	-4.175
-0.206	-7.108					72.009	26.138		9.006	10.375		0.358	2.065		0.645	-2.797		0.204	-4.483
0.052	-7.323					87.313	30.501		5.138	8.123		8.338	17.269		0.264	-1.573		0.129	-4.316
-0.262	-7.078					54.761	26.477		2.198	3.962		1.356	13.965		0.018	-1.952		0.322	-4.269
-0.253	-7.299					43.146	16.262		28.621	8.523		0.455	-0.035		0.206	-1.444		1.055	-2.021
-0.374	-6.747					45.892	16.712		5.965	8.463		1.135	5.507		0.14	-1.988		0.261	-0.307
0.054	-7.292					44.464	15.262		10.719	8.701		12.455	19.106		0.584	-0.524		0.521	-2.232
-0.027	-6.997					37.224	11.07		6.761	6.156		1.253	6.678		-0.084	-1.979		0.446	-1.932
0.054	-7.448					35.026	12.729		13.8	13.816		0.473	3.395		0.337	-1.523		-0.271	-4.537
-0.128	-7.375					61.244	13.492		2.122	4.798		1.189	2.175		0.237	-2.684		0.608	-0.622
-0.197	-6.814					66.607	24.895		2.64	8.53		6.332	23.644		0.261	-1.095		-0.091	-4.177
0.146	-7.204					36.664	13.298		1.478	6.816		0.329	2.059		0.389	-2.32		0.447	-3.966
-0.254	-7.052					32.874	12.349		3.257	4.285		3.134	15.762		0.298	-1.128		1.17	-4.115
0.203	-7.127					45.64	15.645		29.087	9.485		0.606	2.984		0.368	-1.772		-0.18	-4.479
-0.27	-7.33					50.77	15.043		15.123	18.844		2.062	10.183		0.09	-0.949		0.477	-4.054
-0.162	-7.4					31.435	9.383		9.895	7.118		0.953	4.633		-0.158	-3.679		0.104	-4.54
0.027	-7.215					30.728	10.675		5.318	11.04		1.682	10.251		-0.254	-1.863		-0.023	-4.339
-0.031	-7.177					34.06	13.761		3.199	6.154		0.019	-0.5		0.382	-1.503		1.139	-4.146
0.285	-7.545					68.14	22.906		8.79	9.573		13.007	25.164		0.134	-1.804		0.033	-4.53
-0.138	-7.57					68.159	22.648		2.836	4.802		0.394	3.972		0.064	-2.024		-0.082	-3.683
0.038	-7.384					56.278	19.623		8.902	6.735		0.979	5.166		0.373	-0.943		0.179	-2.928
-0.215	-7.493					31.662	11.836		2.439	4.267		1.928	8.643		0.271	-1.706		0.751	-3.717
-0.251	-7.383					69.522	29.495		4.256	5.802		0.323	-0.591		0.464	-1.121		0.58	-2.597
-0.371	-7.219					27.065	9.856		21.787	11.019		0.321	0.653		0.171	-1.141		0.384	-1.726
-0.111	-7.601					38.498	12.051		5.408	5.345		1.635	9.031		0.186	-3.274		0.2	-4.386
0.104	-7.229					66.914	35.063		3	8.089		-0.1	-2.102		0.114	-1.88		0.067	0.628
-0.325	-7.745					31.081	12.104		7.432	7.225		6.834	20.436		0.068	-2.043		0.115	-4.392
-0.063	-7.202					33.064	11.326		13.747	12.241		0.401	0.415		0.289	-2.299		0.118	-4.384
-0.067	-7.291					53.375	12.071		6.969	7.974		0.169	11.635		0.556	-3.496		-0.128	-4.347
									3.822	6.279		0.421	2.979		0.123	-1.294		-0.008	-3.597
									24.995	2.545		0.604	5.95		0.254	-2.88		0.269	-3.261
									25.443	10.015		0.575	3.197		0.211	-3.021		0.014	-4.584
									5.092	16.71		0.859	5.624		0.115	-1.623		0.666	-3.316
									2.556	9.219		0.773	2.051		0.395	-0.366		0.72	-4.126
									12.651	7.895		-0.214	-2.156		0.331	-0.716		-0.029	-3.505
									6.382	7.814		-0.219	1.513		0.461	-0.535		0.155	-3.446
									3.029	-2.136		0.29	0.068		0.326	-1.087		-0.124	-3.335
									14.262	10.585		1.107	4.873		0.43	-1.22		0.058	-2.52
									4.472	-2.757		0.706	2.473		0.424	0.069		0.525	-2.162
									5.709	10.342		0.659	2.428		0.443	-0.539		0.396	0.483
									17.346	17.274		0.751	5.65		0.252	-0.706		0.254	-3.51
									11.354	8.809		0.969	6.857		0.366	-0.504		0.089	-3.141
									5.768	4.854		1.701	11.077		0.728	1.873		0.488	-3.196
									15.101	8.459		12.421	18.344		0.224	-0.918		0.475	-4.511
									7.888	8.11		0.679	6.954		-0.125	-3.192		0.027	-4.289
									2.87	3.92		0.63	3.057		-0.267	-3.09		-0.195	-3.193
									16.706	11.013		3.927	13.415		-0.182	-2.883		-0.079	-1.398
									19.066	8.838		0.84	1.903		0.302	-1.15		0.413	-1.609
									13.179	6.694		0.857	4.21		0.152	-2.069		0.299	-2.082
									5.236	5.653		0.023	-1.769		0.016	-2.669		0.223	-1.695
									15.263	11.062		1.287	8.609		-0.061	-3.55		0.009	-2.894
									9.902	9.26		0.696	7.157		0.287	-1.766		0.209	-3.519
									13.427	10.49		10.143	16.386		0.175	-1.273		0.369	-1.808
									1.675	3.503		0.962	5.795		-0.102	-2.698		0.03	-4.409
									5.199	9.035		0.548	0.522		0.379	-1.045		0.245	-3.429
									2.189	2.112		2.748	16.275		0.375	-1.046		0.182	-1.866
									6.425	9.648		0.83	4.902		-0.12	-3.043		0.31	-3.709
									2.723	4.412		-0.206	-2.398		0.205	-1.866		0.664	-2.105
									3.404	2.93		0.199	1.509		-0.139	-3.326		0.655	-2.671
									16.962	9.438		-0.34	-3.284		-0.232	-2.883		0.268	-3.076
									9.419	9.832		0.123	2.138		0.106	-3.003		0.28	-3.025
									10.557	0.69		7.11	20.726		0.648	-1.691		0.323	-3.28
									4.117	6.168		2.655	16.234		0.187	-1.674		0.097	-2.032
									12.25	8.076		0.132	-0.861		0.09	-2.964		0.348	-1.828
									4.884	9.32		-0.029	-0.91		0.19	-1.87		0.353	-2.268
									2.523	5.55		0.362	0.913		-0.019	-3.66		0.297	-3.054
									7.893	6.04		0.678	2.699		0.39	-2.032		0.012	2.125
									8.451	7.358		2.253	3.889		-0.177	-2.966		0.023	-3.627
									9.499	8.64		-0.045	-1.9		0.264	-1.698		0.137	-2.746
									4.581	6.032		0.964	8.14		0.306	-1.421		0.287	-2.431
									5.241	8.088		0.283	0.087		0.131	-0.821		0.38	-3.5
									6.457	1.388		0.658	3.626		0.291	-0.708		0.149	-3.08
									1.713	-1.201		0.346	1.889		0.362	-1.718		0.486	4.529
									0.872	2.443		1.475	6.99		0.161	-1.759		-0.046	0.267
									2.721	9.081		1.517	8.588		0.502	-1.069		0.028	-3.543
									2.066	5.176		2.581	15.91		0.152	-1.034		0.677	-3.376
									9.16	5.231		0.373	1.987		0.184	-2.574		0.199	0.71
									9.994	8.792		0.192	-0.902		-0.101	-3.319		0.358	-1.882
									3.42	4.963		0.352	3.2		1.046	0.655		0.201	-1.631
									6.144	6.461		1.514	8.177		0.077	-2.523		0.123	-3.359
									13.599	12.156		3.313	13.767		0.373	0.205		0.515	-2.842
									6.487	10.364		3.794	12.256		0.216	-2.859		0.309	-1.384
									7.769	6.389		0.407	3.712		0.316	-1.102		0.445	-2.472
									1.675	1.579		0.318	0.252		-0.272	-3.374		0.151	-2.413
									2.375	5.302		0.352	3.468		0.305	-0.509		0.309	-1.097
									11.429	7.742		2.614	8.404		-0.072	-3.221		0.209	-1.585
									16.181	8.854		1.242	4.449		0.596	-0.431		0.363	-0.58
									2.258	4.828		0.501	2.072		0.349	-0.456		0.262	-3.403
									6.357	6.95		0.084	0.151		0.189	-1.016		0.277	-1.076
									11.41	9.898		0.447	3.628		0.318	-1.154		0.278	-2.365
									7.495	9.416		0.108	-2.053		0.283	-2.623		0.172	-4.099
									1.487	5.171		0.467	2.312		0.412	-1.58		0.12	-2.554
									7.986	8.42		0.155	-0.268		-0.292	-3.653		-0.191	-3.256
									2.901	4.082		0.091	0.438		0.209	0.144		0.358	-3.157
									5.717	12.633		0.768	3.334		0.35	-2.602		0.092	-1.645
									5.541	10.842		-0.084	1.393		0.223	-2.522		-0.238	-4.351
									15.048	8.756		0.532	2.152		0.279	-2.552		-0.247	-2.844
									14.854	10.434		0.371	0.394		0.341	-1.997		0.033	-3.697
									4.801	5.845		0.075	0.088		-0.047	-2.064		-0.281	-2.894
									9.995	7.198		1.853	7.86		-0.054	-3.083		-0.085	-2.097
									3.214	9.618		0.468	3.842		0.342	-2.139		0.192	-2.788
									5.077	7.644		-0.429	2.042		0.16	-2.188		0.331	-2.144
									8.575	10.98		-0.093	-2.116		0.162	-2.167		0.338	-2.537
									1.197	1.637		0.523	6.027		0.152	-1.703		0.207	-3.827
									5.77	6.112		0.154	0.967		0.302	-0.776		0.839	0.425
									3.069	5.132		0.235	-1.082		0.118	-2.716		0.031	-4.016
									1.962	-1.019		0.405	-0.2		0.197	-2.15		-0.114	-4.263
									3.162	8.734		1.358	9.846		0.271	-1.463		-0.077	-4.423
									2.283	7.812		0.045	-0.331		-0.237	-1.483		0.402	-0.354
									9.35	8.849		0.384	5.046		-0.152	-2.754		0.243	-3.229
									12.335	10.891		0.066	-0.909		0.197	-1.278		0.015	-0.815
									13.862	11.487		0.141	0.749		0.309	-0.498		0.139	-0.606
									0.796	1.386		0.681	0.474		0.206	-2.144		-0.079	-4.45
									6.309	1.527		0.599	1.63		-0.267	-2.881		0.293	-1.871
									4.715	10.564		0.387	-0.066		-0.333	-4.124		0.888	-1.503
									6.493	-1.81		-0.118	5.27		0.376	-1.182		0.188	-3.447
									6.92	7.493		0.399	0.019		0.143	-2.631		0.339	-2.794
									7.142	10.35		3.152	10.977		0.066	-1.736		0.502	-2.394
									2.756	3.879		2.72	10.558		-0.408	-2.902		0.342	-2.83
									7.737	8.987		0.601	2.451		0.053	-1.935		0.796	0.177
									4.716	4.948		0.25	1.571		0.242	-1.94		0.018	-3.511
									3.448	7.222		0.573	2.355		0.27	-0.954		-0.164	-3.997
									5.003	0.611		-0.02	3.362		0.243	-1.419		0.198	-3.226
									1.86	0.659		0.36	-0.037		0.271	-2.54		-0.233	-0.81
									16.497	7.956		1.282	6.303		0.187	-2.688		0.328	-1.512
									8.484	7.153		0.707	2.57		-0.271	-3.407		0.413	-0.727
									14.401	6.901		0.099	-1.179		0.19	-2.344		0.257	-1.482
									7.658	9.596		0.237	1.721		0.147	-2.559		0.14	-3.905
									19.813	11.466		-0.152	-0.654		-0.004	-3.253		0.3	0.266
									3.753	-2.048		0.051	1.004		0.19	-2.39		0.189	-3.204
									3.656	-1.22		0	9.426		-0.377	-3.901		0.017	-3.821
									4.955	4.657		0.342	-0.389		0.195	-2.703		0.326	-1.161
									13.792	13.385		0.045	-1.23		0.216	-2.197		0.615	-2.673
									5.308	6.205		-0.186	0.743		0.254	-0.792		0.264	-0.39
									2.856	4.401		0.206	2.166		0.363	-0.319		0.431	-2.495
									9.313	7.113		-0.04	-1.33		0.418	-2.147		-0.031	-3.519
									3.3	6.662		-0.107	-1.371		0.362	-0.329		0.113	-1.844
									7.954	7.434		0.772	4.461		0.201	-1.968		0.067	-2.413
									2.548	4.061		0.137	0.586		-0.075	-2.557		-0.101	-3.18
									3.119	4.304		0.294	2.854		0.315	-2.797		-0.33	-4.149
									3.197	3.418		0.314	0.591		0.307	-1.512		-0.179	-3.804
									2.832	5.644		0.469	3.479		-0.537	-4.075		-0.133	0.097
									10.02	7.869		0.571	3.996		0.158	-2.858		0.165	-2.338
									5.468	5.392		-0.204	-0.411		0	-2.722		0.258	-2.05
									6.271	6.199		-0.002	-1.416		0.046	-3.469		-0.323	-3.423
									1.617	4.304		-0.017	-1.585		0.045	-2.548		-0.247	-4.459
									4.474	1.46		0.535	1.991		-0.389	-3.983		-0.056	-3.283
									6.844	7.404		0.443	2.104		0.298	-1.857		0.188	-3.319
									2.533	3.557		0.778	3.554		-0.509	-4.46		0.418	-3.613
									4.876	7.737		0.21	-0.294		-0.029	-3.051		0.354	-1.945
									5.202	6.46		-0.227	-2.016		0.081	-2.027		0.774	-2.294
									4.482	6.726		0.379	4.838		0.448	-1.831		-0.223	-2.034
									3.373	11.399		0.338	1.818		-0.518	-1.544		-0.19	-4.197
									10.428	5.674		-0.017	-1.45		0.155	-1.905		-0.036	-3.375
									3.155	0.327		0.12	2.132		0.015	-2.296		0.241	-2.232
									2.339	7.466		0.788	2.032		0.393	-1.547		0.041	-2.962
									6.461	4.556		0.431	5.197		0.218	-1.565		-0.233	-3.468
									8.691	6.009		0.031	-1.416		-0.348	-3.871		0.123	-4.008
									4.681	9.712		0.184	0.981		0.061	-2.91		-0.083	-2.749
									8.629	11.911		0.167	-0.37		-0.078	-3.831		0.136	0.864
									5.336	6.295		0.278	2.21		0.162	-2.113		0.338	-2.383
									2.115	5.079		0.204	3.819		0.434	-1.304		0.343	1.898
									6.775	6.272		0.441	1.596		-0.055	-2.837		0.263	-1.922
									4.513	-2.34		0.074	-0.45		0.052	-2.168		-0.111	-4.314
									1.969	6.228		1.499	6.574		-0.055	-2.544		-0.117	-0.889
									5.276	5.004		0.553	5.128		-0.126	-2.903		0.184	0.456
									1.03	-3.009		0.775	-2.212		-0.15	-3.53		-0.128	-0.272
									4.354	5.402		-0.611	-1.439		0.049	-2.152		-0.108	-3.849
									11.415	11.574		-0.287	-0.865		-0.116	-3.242		-0.027	-2.257
									3.04	5.27		-0.213	-1.923		0.204	-1.46		0.47	0.019
									4.926	4.609		0.364	4.492		0.219	-1.858		-0.51	-3.801
									2.911	6.557		3.181	14.093		0.03	-2.857		0.147	-2.01
									3.685	10.178		0.6	4.143		-0.32	-3.547		-0.182	-3.696
									1.068	2.764		0.311	0.285		0.292	-1.959		0.019	-3.896
									4.055	6.14		6.027	29.411		0.02	-2.752		-0.018	-3.888
									5.953	6.753		0.621	1.719		0.134	-2.767		0.199	-0.702
									5.459	10.808		0.138	-0.874		0.168	-2.238		0.359	-3.078
									12.14	7.785		0.318	1.227		-0.168	-3.363		0.09	-2.534
									4.43	6.873		-0.027	-1.508		0.029	-2.657		0.047	0.447
									3.448	-1.775		-0.002	1.076		0.451	-2.593		-0.252	-3.72
									2.665	1.912		0.01	-1.7		-0.271	-3.699		0.19	1.029
									17.906	10.396		0.172	-0.38		-0.015	-2.86		0.202	-0.693
									8.12	4.703		0.474	0.223		-0.353	-0.433		0.002	-2.999
									4.051	3.102		-0.026	-0.586		-0.194	-3.311		0.256	-3.559
									4.368	4.339		0.269	0.452		-0.203	-4.315		-0.121	-1.157
									4.901	3.075		1.488	8.45		0.061	-1.93		-0.287	-4.256
									3.745	6.022		0.021	0.222		-0.196	-2.871		0.282	-1.268
									4.457	1.074		0.256	-0.321		0.353	-1.401		0.259	-1.462
									11.287	10.651		0.183	-0.433		-0.14	-3.881		0.089	-4.167
									3.306	6.613		0.311	2.9		-0.002	-3.632		-0.251	-1.704
									3.998	-1.973		0.26	-0.156		0.046	-3.054		0.296	-2.821
									5.333	4.268		2.111	16.972		0.033	-3.231		0.161	-2.799
									7.309	8.931		0.095	0.209		-0.476	-3.865		0.118	-1.495
									5.057	7.919		0.417	1.502		0.374	-0.202		0.228	-2.807
									3.996	8.012		0.325	-0.44		0.298	-0.74		0.523	-2.59
									4.515	2.222		-0.337	-2.173		0.376	-2.022		-0.253	-3.756
									12.341	5.87		0.234	0.099		0.14	-2.922		-0.132	-1.492
									3.856	6.653		0.115	-1.723		0.332	-1.072
									10.888	10.085		0.499	2.758		0.09	-3.033
									4.681	2.73		0.113	-0.141		0.114	-2.256
									4.65	6.301		0.148	1.415		0.337	-2.509
									9.436	8.334		0.272	5.457		0.05	-3.458
									6.962	4.841		-0.399	-2.368		-0.542	-4.48
									4.549	6.518		0.259	0.265		0.134	-1.801
									14.544	12.596		-0.191	-1.728		0.29	-1.742
									4.454	10.907		0.157	-0.312		0.374	-1.64
									6.307	3.525		0.731	2.654		0.491	-2.422
									8.336	4.689		-0.11	3.961		-0.304	-3.855
									10.844	5.512		0.092	-0.853		-0.146	-2.014
									4.632	6.165		0.043	-1.361		-0.415	-3.558
									2.635	3.958		0.172	0.14		-0.452	-4.226
									4.124	5.661		0.364	1.341		-0.293	-2.919
									12.822	5.167		-0.271	-0.824		0.333	-3.184
									7.189	4.188		0.459	5.297		-0.176	-4.107
									12.935	8.779		-0.204	-0.289		-0.222	-3.315
												-0.127	-1.466		-0.327	-3.768
												0.269	7.926		0.319	-0.347
												0.027	-1.5		-0.332	-4.229
												0.433	0.677		-0.158	-2.799
												-0.041	0.338		0.024	-2.903
												-0.248	-2.194		0.179	-2.556
												-0.21	-1.307		-0.541	-2.599
												0.187	0.361		-0.221	-3.718
												0.394	0.491		0.023	-2.042
												0.281	0.695		0.18	-1.662
												0.262	0.001		0.135	-2.129
												-0.177	-0.417		0.031	-1.448
												-0.2	1.266		-0.054	-1.281
												-0.04	-0.511		0.198	-2.078
												0.134	-1.114		-0.103	-0.438
												0.063	-0.941		0.001	-3.126
												0.154	5.983		-0.078	-2.78
												0.548	0.414		0.027	-3.122
												-0.15	3.107		-0.062	-3.294
												0.251	-1.805		-0.083	-0.06
												0.256	-0.462		0.016	-3.324
												-0.203	-1.097		-0.062	-2.392
												0.112	1.433		-0.194	-4.301
												1.609	16.485		0.132	-2.739
												0.105	-1.812		0.063	-1.678
												1.247	9.741		-0.226	-2.903
												0.578	3.731		-0.277	-0.586
												0.084	0.434		0.117	-2.342
												0.184	-0.816		-0.09	-1.025
												-0.077	-1.836		0.079	-2.007
												-0.216	-1.919		0.037	-2.601
												-0.311	-0.208		0.255	-1.307
												-0.422	-1.244		0.38	-1.323
												2.31	7.363		0.138	-2.333
												0.102	0.447		-0.309	-1.85
												0.229	-0.344		0.056	-2.586
												-0.08	2.76		-0.316	-3.117
												1.58	10.229		0.253	-1.231
												0.13	2.995		-0.073	-1.444
												0.327	1.517		-0.079	-2.797
												0.04	-1.844		-0.298	-3.775
												-0.303	-1.813		0.146	-3.488
												-0.259	2.135		-0.069	-2.641
												-0.084	-1.261		-0.15	-2.08
												0.042	-1.816		0.132	-2.498
												1.048	3.313		0.059	-2.654
												-0.121	3.165		-0.104	-3.314
												-0.385	0.347		-0.217	-3.375
												-0.302	5.773		-0.022	-0.746
												0.186	1.552		0.118	-2.634
												1.015	2.686		-0.129	-2.336
												0.239	-0.425		0.273	-1.687
												-0.005	-2.454		0.202	-1.793
												-0.137	-1.246		0.143	-2.558
												0.114	-0.989		-0.354	-2.37
												-0.035	-0.054		0.112	-3.15
												0.271	-1.419		0.046	-1.905
												0.365	3.021		-0.151	-3.2
												0.152	2.288		-0.347	-1.821
												-0.055	-2.869		-0.085	0.025
												0.251	0.675		-0.252	-1.94
												0.114	-1.314		0.354	-0.238
												-0.039	-0.871		-0.172	-2.445
												0.329	2.42		0.024	-2.749
												0.088	0.817		0.029	-0.973
												0.116	-0.804		0.155	-1.676
												0.135	-1.82		0.088	-1.753
												-0.236	-0.495		-0.114	-3.355
												0.125	4.645		-0.28	-0.637
												-0.369	1.999		0.103	-2.85
												0.293	1.828		0.109	-2.771
												0.084	-0.786		-0.002	-1.685
												0.182	-1.368		0.119	-3.474
												0.18	0.118		0.116	-3.186
												-0.12	-1.5		-0.34	-4.318
												-0.087	-2.14		0.169	0.282
												0.51	0.757		-0.099	-1.365
												-0.108	2.805
												0.232	4.405
												0.3	0.569
												0.211	-0.254
												-0.156	-1.441
												-0.57	3.516
												-0.104	2.363
												-0.085	-0.277
												0.549	0.44
												1.766	10.042
												0.2	-1.355
												0.004	-2.24
												0.024	-0.142
												-0.355	1.971
												-0.105	0.085
												-0.25	0.017
												0.202	2.769
												-0.117	-1.485
												0.377	-1.08
												0.26	1.28
												-0.026	0.538
												-0.082	8.472
												0.081	-0.333
												-0.033	-2.557
												-0.348	4.698
												0.092	3.442
												-0.083	-0.956
												0.678	7.415
												0.208	1.278
												0.197	-0.672
												-0.114	-0.947
												2.257	13.532
												0.271	6.664
												0.525	-0.815
												0.235	4.186
												0.071	4.196
												-0.171	-0.554
												0.118	-1.342
												-0.373	1.652
												0.313	2.423
												0.103	4.608
												-0.16	-1.12
												-0.278	2.725
												0.064	-2.018
												0.127	-0.714
												0.09	-0.633
												-0.149	0.77
												-0.076	-0.791
												0.619	0.575
												0.179	0.67
												0.192	0.292
												0.564	3.709
												-0.213	-0.059
												0.478	1.115
												-0.041	2.193
												-0.185	-0.75
												-0.279	3.266
												-0.158	1.03
												0.194	-0.651
												-0.053	0.047
												-0.066	-0.586
												-0.095	0.783
												-0.187	0.451
												-0.128	-1.675
												-0.447	0.763
												-0.136	-1.08
												-0.545	-1.215
												0.565	2.562
												0.082	0.414
												-0.048	0.807
												0.133	1.952
												0.236	0.43
												-0.051	-0.41
												-0.375	-1.948
												-0.172	-1.245
												0.313	-0.253
												0.065	-0.543
												0.412	2.02
												-0.23	-0.419
												-0.512	-1.863
												-0.29	2.171
												0.087	1.41
												-0.076	-1.658
												0.341	0.247
												-0.543	-2.71
												-0.014	0.986
												0.488	2.028
												-0.101	2.027
												0.396	2.789
												0.253	1.131
												-0.307	-2.127
												-0.617	4.077
												-0.156	-2.03
												0.033	3.11
												-0.518	1.553
												0.102	-1.279
												0.417	5.635
												0.038	3.075
												0.144	0.115
												0.217	1.513
												0.083	1.908
												-0.262	0.561
												-0.468	-1.937
												0.194	-0.014
												0.154	2.07
												0.06	1.379
												0.304	-0.349
												-0.261	-0.864
												0.158	0.119
												0.023	-1.211
												-0.05	0.917
												0.748	3.558
												-0.318	-2.159
												0.031	-0.481
												0.612	-0.218
												0.01	0.201
												0.257	1.631
												0.049	1.107
												0.037	2.241
												-0.085	1.832
												0.263	0.052
												-0.03	-0.058
												-0.162	1.843
												-0.214	1.984
												0.01	5.319
												-0.027	0.739
												-0.074	-1.272
												-0.408	-1.061
												-0.427	1.917
												-0.65	-2.79
												-0.279	2.036
												-0.579	-1.134
												-0.384	6.809
												-0.176	-0.251
												-0.32	1.25
												0.316	1.486
												0.365	6.575
												0.124	1.196
												-0.538	1.117
												-0.244	-0.415
												0.331	0.463
												-0.508	-1.656
												-0.129	-0.1
												0.056	0.004
												-0.452	0.26
												-0.19	-0.03
												-0.128	2.661
												0.029	0.261
												-0.598	5.132
												-0.212	-1.755
												-0.154	0.064
												0.111	-0.364
												-0.431	-0.648
												-0.42	-0.072
												-0.372	-0.779
												-0.058	-0.82
												0.513	5.568
												-0.444	-1.23
												-0.217	0.284
												-0.336	-1.362
												-0.576	2.509
												0.267	-0.094
												-0.013	-1.002
												0.082	1.238
												-0.254	0.165
