# Supplementary material for: EphA7 promotes myogenic differentiation via cell-cell contact
Source: eLife. 2020 Apr 21;9:e53689. doi: 10.7554/eLife.53689 (PMC7173967; doi:10.7554/eLife.53689)
Supplement: Figure 2—source data 1. [file elife-53689-fig2-data1.xlsx]

## Sheet: Sheet1
2A					2B					2C
						Average A7+	Average A7+	Average A7+			Average A7 coexpression with
0	Sample	Average % A7+			Sample	0	48	96		Sample	PAX7	MyoD	Myogenin
	1	0			1	0	12.1	25.6		1	0	26.32	100
	2	0			2	0	1.9	69.6		2	0	11.63	100
	3	0			3	0	7.8	62		3	0	58.54	100
	4	0			4	0	0	80.6		4	0	75.86	100
					5	0	0	54.5		5	0	52.27	100
	mean	0			6	0	18.5	74.5		6	0	45.45	100
	sem	0			7	0	10	74.1		7	0	52.38	100
					8	0	17.6	73.2		8	0	41.18	100
48	Sample	Average A7+			9	0	25.7	74.4		9	0	41.18	100
	1	2.8			10	0	36.7	68.8		10	0	30.77	100
	2	1			11	0	28.2	55.8
	3	20			12	0	17.9	61.2			0	43.558	100
	4	6.1			13	0	6.3	74			0	6.00059	0
					14	0	17.6	69
	mean	7.475			15	0	31	67.1
	sem	4.97268
					One-way ANOVA					One-way ANOVA
96	Sample	Average A7+			Dunn's multiple comparisons test			P Value		Dunn's multiple comparisons test			P Value
	1	51.6			0 vs. 48	Yes	*	0.0134		PAX7 vs. MyoD	Yes	*	0.0249
	2	63.6			0 vs. 96	Yes	****	<0.0001		PAX7 vs. Myogenin	Yes	****	<0.0001
	3	75.8			48 vs. 96	Yes	**	0.0027		MyoD vs. Myogenin	Yes	*	0.0249
	4	63.6667
						0h	48h	96h			PAX7	MyoD	Myogenin
One-way ANOVA					Mean	0	15.42	65.63		Mean	0	43.56	100
Dunn's multiple comparisons test	P Value				Std. Error of Mean	0	2.952	3.432		Std. Error of Mean	0	5.693	0
0 vs. 48	No	ns	0.3824
0 vs. 96	Yes	****	<0.0001
48 vs. 96	Yes	****	<0.0001
	0h	48h	96h
Mean	0	7.475	63.67
Std. Error of Mean	0	4.306	4.94
