# Supplementary material for: EphA7 promotes myogenic differentiation via cell-cell contact
Source: eLife. 2020 Apr 21;9:e53689. doi: 10.7554/eLife.53689 (PMC7173967; doi:10.7554/eLife.53689)
Supplement: Figure 4—source data 1. [file elife-53689-fig4-data1.xlsx]

## Sheet: P1 weight
		WT	EphA7-/-		t-Test: Two-Sample Assuming Unequal Variances
	animal
	1	2.25	1.14			Variable 1	Variable 2
	2	2.24	1.18		Mean	1.2925	1.62222
	3	1.56	1.15		Variance	0.0231659	0.132194
	4	1.58	1.09		Observations	12	9
	5	1.33	1.21		Hypothesized Mean Difference	0
	6	1.42	1.46		df	10
	7	1.49	1.29		t Stat	-2.5577
	8	1.37	1.49		P(T<=t) one-tail	0.0142428
	9	1.36	1.43		t Critical one-tail	1.81246
	10		1.17		P(T<=t) two-tail	0.0284855
	11		1.44		t Critical two-tail	2.22814
	12		1.46
	mean	1.62222	1.27111
	std	0.342792	0.143716
	sem	0.114264	0.0414873

## Sheet: Adult TA weight
Animal	WT	EphA7 -/-				t-Test: Two-Sample Assuming Unequal Variances
1	0.04755	0.0329				WT vs A7 Female
2	0.06195	0.0498					Variable 1	Variable 2
3	0.0579	0.0754				Mean	0.0557375	0.0414667
4	0.05555	0.07235				Variance	3.67806e-05	3.90583e-06
						Observations	4	3
mean	0.0557375	0.04135				Hypothesized Mean Difference	0
std	0.00525219	0.0173589				df	4
sem	0.00234885	0.00776316				t Stat	4.40468
						P(T<=t) one-tail	0.00582433
						t Critical one-tail	2.13185
						P(T<=t) two-tail	0.0116487
						t Critical two-tail	2.77645

## Sheet: Adult TA myofiber count
Animal	WT	EphA7 -/-
1	2235	1158
2	2677	1934
3	2016	1231
4	3100
mean	2507	1441
std	312.541	428.508
sem	156.271	303.001
F-Test Two-Sample for Variances			t-Test: Two-Sample Assuming Unequal Variances
				Adult myofiber One star sig
		Variable 1	Variable 2		Variable 1	Variable 2
	Mean	2507	1441	Mean	2507	1441
	Variance	231871	183619	Variance	231871	183619
	Observations	4	3	Observations	4	3
	df	3	2	Hypothesized Mean Difference	0
	F	1.26279		df	5
	P(F<=f) one-tail	0.470528		t Stat	3.08792
F Critical one-tail	19.1643		P(T<=t) one-tail	0.0136118
			t Critical one-tail	2.01505
			P(T<=t) two-tail	0.0272236
			t Critical two-tail	2.57058

## Sheet: Adult TA CSA
Sample mean	3838.21	2957.43	2825.37		2499.59	1615.61	1803.11
Sample SEM	65.8975	91.0565	48.4432		123.079	48.3001	49.3249
Total mean	3148.95				1931.18
Total SEM	72.8854				56.4054
	WT 0 #1	WT 0 #2	WT 0 #3	n	A7- 0 #1	A7- 0 #2	A7- 0 #3	n
	459	248	446	465	600.837	328.613	578.851	324
	608	351	489		610.663	417.254	611.826
	628	387	524		628.07	461.788	615.041
	718	481	669		683.925	543.915	683.835
	1123	627	674		770.644	552.886	735.615
	1150	729	676		785.595	605.323	763.061
	1373	748	687		891.11	606.07	773.1
	1396	799	715		958.52	616.857	785.84
	1503	801	731		1058.89	620.061	792.323
	1561	827	742		1100.32	664.808	793.819
	1651	851	755		1103.64	673.673	803.304
	1746	856	799		1131.61	695.566	819.557
	1748	868	827		1141.98	708.809	864.014
	1774	882	830		1211.29	715.323	864.198
	1811	922	834		1252.93	762.207	864.219
	1847	929	865		1267.67	765.912	866.171
	1984	949	955		1367.05	772.246	873.062
	1996	954	963		1392.84	774.595	885.984
	2027	955	982		1420.18	796.01	909.479
	2078	1060	990		1427.02	811.654	913.858
	2079	1063	1060		1531.04	848.819	928.011
	2082	1117	1113		1639.27	872.634	934.482
	2110	1161	1209		1676.81	873.168	937.033
	2334	1225	1211		1697.72	877.779	985.839
	2405	1258	1257		1731.01	879.469	986.693
	2405	1269	1258		1740.25	902.965	1000.04
	2413	1271	1273		1746.12	918.984	1002.93
	2434	1275	1302		1768.87	927.635	1003.35
	2476	1301	1309		1774.77	959.855	1022.58
	2576	1316	1325		1822.38	963.625	1039.02
	2628	1321	1332		1824.48	977.402	1043.37
	2695	1391	1338		1875.13	977.829	1050.13
	2749	1394	1344		1931.31	987.014	1052.05
	2773	1397	1349		1955.87	1004.74	1066.04
	2792	1422	1350		2022.73	1019.23	1100
	2957	1466	1363		2031.7	1030.8	1123.29
	2965	1497	1370		2039.08	1082.92	1136.53
	3058	1498	1372		2101.11	1090.83	1138.45
	3073	1534	1375		2114.14	1107.88	1139.09
	3113	1569	1413		2183.13	1133	1141.98
	3134	1589	1430		2232.9	1138.6	1151.37
	3239	1651	1448		2235.07	1163.76	1189.71
	3239	1683	1494		2257.04	1167.36	1199.86
	3281	1711	1538		2315.67	1173.73	1223.46
	3305	1718	1539		2392.04	1187.08	1242.68
	3347	1737	1571		2425.67	1194.95	1276.35
	3411	1753	1574		2434.96	1231.47	1288.68
	3471	1786	1608		2494.13	1250.36	1296.94
	3503	1824	1617		2545.3	1256.57	1334.53
	3556	1858	1661		2554.03	1273.12	1334.85
	3584	1942	1664		2576.79	1309.01	1374.04
	3628	1954	1665		2578.07	1327.59	1396.23
	3655	1964	1706		2649.88	1329.83	1449.55
	3726	1969	1733		2657.52	1366.57	1456.49
	3739	2004	1736		2679.95	1371.37	1497.07
	3741	2083	1807		2730.68	1394.07	1506.9
	3809	2193	1820		2751.4	1408.43	1571.27
	3855	2216	1840		2790.06	1417.4	1599.81
	3874	2239	1871		2816.97	1431.29	1603.55
	3916	2277	1877		2973.64	1433.53	1650.86
	3966	2343	1878		3000.45	1440.15	1668.55
	4034	2422	1946		3141.62	1502.73	1686.96
	4049	2521	1954		3142.64	1505.3	1720.39
	4067	2542	1960		3151.03	1585.61	1736.76
	4074	2555	1960		3171	1622.45	1747.19
	4086	2560	1990		3198.24	1656.63	1759.69
	4123	2579	2010		3284.4	1666.91	1798.99
	4130	2612	2083		3326.93	1673.29	1802.91
	4177	2639	2084		3390.68	1676.97	1874.17
	4211	2660	2090		3478.9	1691.55	1915.08
	4213	2688	2125		3510.83	1718.14	1917.21
	4237	2722	2138		3510.83	1725.56	1947.11
	4267	2805	2150		3627.98	1755.09	2046.22
	4268	2850	2151		3634.93	1761.5	2070.57
	4273	2854	2186		3685.33	1808.92	2109.87
	4296	2866	2223		3719.51	1867.44	2154.19
	4314	2937	2231		3747.17	1893.61	2197.77
	4327	2979	2247		3904.37	1910.16	2197.77
	4339	3002	2330		4043.96	1950.85	2208.13
	4362	3011	2365		4051.14	1960.78	2234.4
	4367	3109	2380		4085.65	1972.85	2253.73
	4421	3179	2412		4135.8	2025.29	2267.64
	4452	3195	2497		4226.15	2103.46	2280.75
	4458	3214	2524		4426.18	2174.7	2286.23
	4461	3242	2533		4579.04	2209.5	2333.93
	4468	3253	2606		4656.08	2260.86	2383.16
	4481	3337	2609		4772.63	2277.97	2383.7
	4613	3373	2650		4827.74	2278.61	2397.05
	4631	3377	2675		5040.48	2324.64	2401.18
	4637	3400	2776		5388.3	2344.93	2422.04
	4654	3435	2787			2350.91	2439.45
	4751	3437	2794			2412.58	2454.83
	4815	3471	2797			2431.12	2469.78
	4861	3506	2805			2472.02	2501.39
	4864	3508	2852			2520.93	2530.12
	4869	3510	2867			2536.31	2556.17
	4918	3567	2877			2713.05	2560.34
	4947	3569	2885			2720.86	2561.3
	4952	3574	2906			2747.34	2649.73
	4980	3684	2906			2790.17	2675.25
	4983	3711	2944			2830.64	2689.35
	5017	3730	2954			2859.58	2723.63
	5036	3754	2974			2874.43	2771.16
	5086	3757	2995			2902.84	2808.58
	5117	3790	3004			2955.7	2812.59
	5181	3834	3041			3073.6	2822.74
	5242	3845	3072			3081.72	2823.49
	5260	3884	3127			3091.76	2932.95
	5282	3902	3136			3306.69	3112.05
	5328	3925	3142			3346.14	3141.53
	5412	3952	3164			3542.23	3154.88
	5507	3958	3193			4227.97	3177.73
	5547	4018	3219			4272.61	3216.18
	5712	4020	3229				3235.08
	5730	4023	3251				3246.29
	5744	4112	3272				3332.68
	5760	4132	3333				3355.76
	5786	4198	3338				3363.5
	5847	4201	3366				3407.88
	5889	4202	3376				3584.52
	6187	4290	3382				4590.01
	6197	4381	3405
	6206	4486	3482
	6291	4486	3493
	6296	4599	3526
	6414	4665	3533
	6432	4669	3545
	6449	4744	3554
	6467	4755	3622
		4761	3638
		4796	3658
		4828	3671
		5272	3731
		5394	3752
		5402	3768
		5549	3774
		5699	3777
		5857	3836
		5864	3891
		5944	3916
		5992	3929
		6100	3939
		6119	3995
		6153	3999
		6174	4007
		6199	4041
		6214	4049
		6323	4067
		6351	4150
		6393	4171
			4198
			4219
			4233
			4237
			4267
			4270
			4276
			4284
			4287
			4311
			4381
			4435
			4486
			4505
			4549
			4564
			4608
			4698
			4837
			4858
			4893
			5049
			5103
			5110
			5271
			5308
			5380
			5521
			5573
			5647
			5864
			6037
			6120
			6348
			6390
			6457

## Sheet: Fiber myonuclei
Sample	WT	EphA7-/-																		EDL myonuclei
1	275	226																		t-Test: Two-Sample Assuming Unequal Variances
2	275	231																		Adult avg myonuclei 2 star sig
3	280	214																			Variable 1	Variable 2
avg	276.667	223.667																		Mean	276.667	223.667
std	2.35702	7.13364																		Variance	8.33333	76.3333
sem	1.36083	4.11861																		Observations	3	3
																				Hypothesized Mean Difference	0
WT 1			WT 2			WT 3					A7 1			A72			A7 3			df	2
1	174		1	213		1	285				1	194		1	261		1	213		t Stat	9.97655
2	393		2	340		2	175				2	179		2	234		2	252		P(T<=t) one-tail	0.00494907
3	242		3	311		3	175				3	125		3	275		3	121		t Critical one-tail	2.91999
4	255		4	303		4	123				4	124		4	258		4	277		P(T<=t) two-tail	0.00989815
5	267		5	302		5	243				5	124		5	233		5	224		t Critical two-tail	4.30265
6	215		6	312		6	247				6	182		6	88		6	248
7	256		7	314		7	446				7	190		7	283		7	252
8	238		8	173		8	381				8	195		8	221		8	279
9	350		9	287		9	286				9	334		9	211		9	131
10	361		10	151		10	219				10	294		10	210		10	250			WT	EphA7 -/-
11	367		11	322		11	303				11	326		11	213		11	188			276.667	223.667
12	257		12	295		12	254				12	134		12	253		12	175			1.36083	4.11861
13	172		13	247		13	342				13	247		13	243		13	225
14	381		14	309		14	210				14	283		14	251		14	215
15	316		15	175		15	292				15	307		15	223		15	225
16	249		16	185		16	559				16	271		16	275		16	146
17	270		17	212		17	361				17	329		17	237		17	125
18	212		18	317		18	222				18	268		18	235		18	233
19	319		19	319		19	207				19	280		19	218		19	205
20	215		20	366		20	448				20	266		20	186		20	311
avg	275.45		21	235		21	163				21	90		21	246		21	201
			22	339		22	297				22	90		22	236		22	213
			23	301		23	211				23	321		23	257		23	227
			24	284		avg	280.391				24	170		24	214		avg	214.609
			avg	275.5							25	332		avg	231.708
											avg	226.2

## Sheet: MPC
WT	AVG myonuclei	avg MP			Epha7 Null	AVG myonuclei	avg MP
1	236	5.42			1	174	2.12
2	235	7.2			2	153	3.04
3	259	11.35			3	144	3.91
4	282	5.88			4	130	3.07
avg	253	7.4625			avg	150.25	3.035
std	19.3003	2.33761			std	15.9746	0.633265
WT		# of fibers counted	Total Myonuclei	total muscle progenitor
1		21	4962	114
2		20	4710	144
3		20	5194	227
4		27	7627	159
		avg	5623.25						t-Test: Two-Sample Assuming Unequal Variances			t-Test: Two-Sample Assuming Unequal Variances
		std							Pax7 pos cells at P28 per mm 2 Star sig			Myonuclei per mm 2 star sig
		sem								Variable 1	Variable 2		Variable 1	Variable 2
									Mean	1.35614	2.69079	Mean	65.1999	94.9297
									Variance	0.216717	0.254881	Variance	19.594	258.84
									Observations	4	4	Observations	4	4
									Hypothesized Mean Difference	0		Hypothesized Mean Difference	0
									df	6		df	3
EphA7		# of fibers counted	Total Myonuclei	total muscle progenitor					t Stat	-3.88699		t Stat	-3.56337
1		25	4353	53					P(T<=t) one-tail	0.00405247		P(T<=t) one-tail	0.0188648
2		25	3839	76					t Critical one-tail	1.94318		t Critical one-tail	2.35336
3		23	3332	90					P(T<=t) two-tail	0.00810493		P(T<=t) two-tail	0.0377296
4		27	3399	80					t Critical two-tail	2.44691		t Critical two-tail	3.18245
		avg
		std
		sem
									t-Test: Two-Sample Assuming Unequal Variances
									WT vs A7 null
WT		6.9		0.21						Variable 1	Variable 2
EphA7 -/-		0.2		0.23					Mean	1.49167	4.214
									Variance	0.643025	0.419
									Observations	6	5
									Hypothesized Mean Difference	0
									df	3
									t Stat	-3.85593
									P(T<=t) one-tail	0.0154085
0hr fibers Satellite cell count with pax7 and CD34									t Critical one-tail	2.35336
slide #	EphA7 -/- Avg SC #			slide #	WT Avg SC #				P(T<=t) two-tail	0.030817
1	0.82			1	4.1				t Critical two-tail	3.18245
2	1.3			2	4.6
3	0.83			3	3.75
4	2.2			4	4.8
5	1.3			5	3.82
6	2.5
avg	1.49167	ttest	5.91995e-05	avg	4.214
std	0.643025	ttest	6.7522e-05	std	0.41855
#1			#2			#4			#5
Fiber #	Total		Fiber #	Total		Fiber #	Total		Fiber #	Total
1	1		1	0		1	1		1	1
2	1		2	2		2	1		2	0
3	0		3	0		3	0		3	2				avg	4.214
4	1		4	1		4	0		4	2				avg	1.49167
5	0		5	0		5	1		5	0
6	1		6	1		6	0		6	0				std	0.643025
7	0		7	4		7	1		7	1				std	0.41855
8	2		8	1		8	2		8	1
9	1		9	0		9	5		9	2
10	1		10	4		10	4		10	4
11	1		11	2		11	1		11	3
avg	0.818182		12	2		12	2		12	0
			13	0		13	5		13	2
#3			14	1		14	2		14	1
Fiber #	Total		15	2		15	2		15	2
1	1		16	0		16	0		16	1
2	2		17	0		17	1		17	2
3	1		18	2		18	3		18	0
4	1		19	2		19	2		19	0
5	0		20	1		20	1		20	3
6	0		21	2		21	4		21	2
7	2		22	2		22	4		22	1
8	1		avg	1.31818		23	2		23	1
9	0					24	4		24	0
10	1					25	5		avg	1.29167
11	1					26	4
12	0					27	4
avg	0.833333					avg	2.25926
