# Supplementary material for: EphA7 promotes myogenic differentiation via cell-cell contact
Source: eLife. 2020 Apr 21;9:e53689. doi: 10.7554/eLife.53689 (PMC7173967; doi:10.7554/eLife.53689)
Supplement: Figure 5—source data 1. [file elife-53689-fig5-data1.xlsx]

## Sheet: WT 0
FileName	TA 1	TA 2	TA 3
Number of fibers	3587	2344	3141
	Average fiber size (um)	Average fiber size (um)	Average fiber size (um)
mean	2765.23	3067.15	2623.89
std dev	1289.86	2250.35	1266.9
SEM	21.5366	46.4806	22.6052							count	1	2	3		1	2	3	mean	SEM
1	859.26	3936.73	4798.63			637.174	319.909	637.174		<500	0	147	0		0	6.70009	0	2.23336	2.23336
2	5335.34	957.083	3830.98			637.174	319.909	639.818		500-1000	219	195	180		6.39043	8.88788	5.78406	7.02079	0.949812
3	3735.8	703.271	3738.44			642.462	322.553	642.462		1000-1500	514	210	442		14.9985	9.57156	14.2031	12.9244	1.69207
4	856.616	2895.04	832.821			650.393	322.553	647.75		1500-2000	478	273	501		13.9481	12.443	16.099	14.1634	1.06086
5	2659.74	5129.12	2924.13			650.393	322.553	650.393		2000-2500	468	239	473		13.6563	10.8933	15.1992	13.2496	1.25952
6	4907.03	5909.06	6202.53			653.037	322.553	650.393		2500-3000	408	204	428		11.9055	9.29809	13.7532	11.6523	1.2923
7	3585.1	333.128	5530.99			658.325	325.197	653.037		3000-3500	406	201	381		11.8471	9.16135	12.2429	11.0838	0.96799
8	4576.55	1668.29	2051.65			658.325	325.197	655.681		3500-4000	359	215	329		10.4756	9.79945	10.572	10.2824	0.243048
9	2186.49	2836.88	3476.7			660.969	325.197	655.681		4000-4500	366	206	191		10.6799	9.38924	6.13753	8.73556	1.35139
10	3238.75	17328	5980.45			660.969	325.197	663.613		4500-5000	208	249	109		6.06945	11.3491	3.50257	6.97372	2.30979
11	4169.39	417.732	3251.97			660.969	327.841	668.901		5000-5500	106	55	53		3.09308	2.50684	1.70308	2.43434	0.402892
12	2979.65	8925.73	711.203			666.257	327.841	674.188		5500-6000	32	50	25		0.933761	2.27894	0.803342	1.33868	0.471635
13	3281.05	8566.16	846.04			668.901	330.484	676.832		>6000	22	40	23		0.641961	1.82315	0.739075	1.06806	0.378585
14	4698.17	5681.69	1972.33			668.901	330.484	676.832
15	1121	949.151	1972.33			671.545	330.484	679.476
16	4417.92	5123.83	3936.73			671.545	330.484	682.12
17	1586.33	3138.28	3233.46			674.188	330.484	682.12								mean
18	5102.68	2019.92	6202.53			674.188	333.128	682.12							<500	2.23336
19	3830.98	30005.3	2974.36			676.832	333.128	684.764							500-1000	7.02079
20	3265.19	25748.7	4259.28			676.832	333.128	687.408							1000-1500	12.9244
21	3799.25	3159.43	848.684			682.12	333.128	690.052							1500-2000	14.1634
22	2506.39	4782.77	2612.15			687.408	333.128	690.052							2000-2500	13.2496
23	2170.62	1707.94	5686.98			692.696	333.128	695.339							2500-3000	11.6523
24	2601.57	4248.71	6284.49			692.696	333.128	700.627							3000-3500	11.0838
25	3452.9	4658.51	5462.25			692.696	335.772	703.271							3500-4000	10.2824
26	2728.48	5483.4	6091.49			692.696	341.06	703.271							4000-4500	8.73556
27	3455.55	3180.58	6035.97			697.983	343.704	708.559							4500-5000	6.97372
28	1940.6	1208.25	4222.27			697.983	343.704	708.559							5000-5500	2.43434
29	4288.37	1242.62	5454.32			700.627	343.704	711.203							5500-6000	1.33868
30	3460.83	2757.56	3778.1			703.271	343.704	711.203							>6000	1.06806
31	4769.55	4727.25	3035.17			708.559	346.348	713.847
32	3315.42	7849.67	4640			711.203	346.348	713.847
33	4674.37	4647.93	8137.85			711.203	346.348	716.49
34	5520.41	4912.32	2992.87			713.847	348.992	716.49
35	2252.58	2942.63	4502.52			713.847	354.279	716.49
36	4111.23	4312.16	2823.66			713.847	356.923	719.134
37	4259.28	1760.82	7114.67			719.134	356.923	721.778
38	3738.44	3661.77	6025.39			727.066	359.567	724.422
39	5089.46	5073.6	3262.54			729.71	359.567	727.066
40	3130.35	3331.28	1102.5			732.354	362.211	729.71
41	1893.02	8550.29	2064.87			732.354	362.211	732.354
42	2442.94	5237.52	4534.25			734.998	364.855	732.354
43	2987.58	1385.39	4497.23			734.998	364.855	734.998
44	2408.57	7791.5	2781.36			737.641	364.855	737.641
45	4010.76	7450.44	4462.86			737.641	364.855	742.929
46	4777.48	5483.4	1853.36			740.285	364.855	742.929
47	3024.59	3587.74	3032.53			740.285	364.855	742.929
48	4185.26	3693.49	732.354			742.929	367.499	748.217
49	5200.5	5488.69	708.559			745.573	367.499	750.861
50	1044.33	2403.28	5176.71			750.861	367.499	750.861
51	4499.88	3452.9	3685.56			750.861	370.143	750.861
52	3759.59	4510.45	3545.44			750.861	370.143	753.505
53	2107.17	2969.07	1364.24			756.149	370.143	756.149
54	5055.09	2440.3	4349.18			756.149	372.787	758.792
55	5118.54	912.137	1657.71			756.149	375.43	758.792
56	3640.62	4917.61	3447.61			758.792	375.43	758.792
57	4185.26	4695.52	4338.6			761.436	375.43	766.724
58	3072.18	5390.86	3077.47			766.724	378.074	766.724
59	1850.71	3902.36	4957.27			769.368	378.074	766.724
60	2773.43	5364.42	1890.37			772.012	378.074	772.012
61	3281.05	1409.19	5089.46			774.656	380.718	772.012
62	3405.31	5589.15	5137.05			774.656	383.362	772.012
63	838.109	4454.93	1573.11			777.3	386.006	774.656
64	1663	1266.42	3587.74			779.943	386.006	774.656
65	3873.28	2247.29	5821.81			782.587	386.006	777.3
66	5261.31	1935.32	772.012			782.587	386.006	782.587
67	3318.06	3860.06	2530.19			785.231	388.65	785.231
68	3484.63	1308.72	898.918			790.519	388.65	785.231
69	5002.21	1446.2	4536.89			795.807	388.65	787.875
70	4203.76	3349.79	2939.99			795.807	388.65	790.519
71	4510.45	3857.42	4550.11			798.451	388.65	793.163
72	2292.24	3756.95	2226.14			801.094	388.65	793.163
73	3939.38	2519.61	3413.24			803.738	388.65	801.094
74	5293.04	441.527	3905			803.738	391.294	801.094
75	3011.37	3526.93	5208.44			803.738	391.294	803.738
76	1520.23	3854.77	639.818			806.382	391.294	803.738
77	2017.28	1715.88	2839.52			811.67	393.938	806.382
78	3125.06	3801.89	3143.57			814.314	396.581	809.026
79	668.901	4216.98	1676.22			814.314	396.581	809.026
80	740.285	571.077	4433.78			814.314	396.581	819.602
81	2286.95	4023.98	3905			816.958	396.581	819.602
82	2458.8	3405.31	2228.79			816.958	396.581	819.602
83	2736.41	4875.31	4883.24			819.602	396.581	822.245
84	1261.13	2588.35	1549.31			824.889	399.225	822.245
85	3749.02	3828.33	1033.76			827.533	401.869	824.889
86	2591	2318.68	898.918			835.465	401.869	824.889
87	1919.45	1760.82	3905			835.465	404.513	827.533
88	2913.55	2984.94	2760.21			838.109	404.513	832.821
89	4386.19	586.94	793.163			838.109	404.513	832.821
90	1718.52	4214.34	5811.24			838.109	404.513	835.465
91	1390.68	2355.69	3479.34			838.109	407.157	835.465
92	1086.63	22623.6	1282.28			843.396	407.157	840.753
93	2585.71	2212.92	5094.75			843.396	407.157	840.753
94	2257.87	3550.73	3209.67			846.04	409.801	846.04
95	2625.37	3997.54	3352.43			846.04	409.801	846.04
96	4793.35	1147.44	4748.4			848.684	409.801	846.04
97	5303.62	518.2	1903.59			851.328	409.801	848.684
98	1636.56	523.487	4478.73			851.328	412.445	848.684
99	2826.3	3854.77	5033.94			851.328	412.445	848.684
100	888.342	3944.66	1948.54			851.328	415.089	848.684
101	4214.34	5287.75	3632.69			851.328	415.089	848.684
102	1382.75	2123.03	3415.89			851.328	417.732	851.328
103	2926.77	3495.2	3460.83			851.328	417.732	853.972
104	3608.89	13058.1	3043.1			853.972	417.732	861.904
105	2739.06	475.898	1705.3			856.616	420.376	867.191
106	5909.06	972.946	3072.18			859.26	420.376	867.191
107	3756.95	3487.27	4581.84			859.26	425.664	869.835
108	3474.05	2226.14	5716.06			859.26	425.664	875.123
109	3846.84	928	3143.57			864.547	425.664	880.411
110	4267.22	4957.27	2202.35			864.547	428.308	880.411
111	3569.23	1308.72	4587.12			864.547	430.952	880.411
112	5441.1	3865.35	4655.87			869.835	433.596	880.411
113	4581.84	3640.62	4383.55			869.835	438.883	883.055
114	2852.74	2006.7	904.206			869.835	441.527	885.698
115	3183.23	2249.94	4616.21			869.835	441.527	888.342
116	3963.17	2337.19	4904.39			872.479	441.527	888.342
117	1752.89	412.445	4222.27			872.479	441.527	890.986
118	4135.02	4978.42	2527.55			872.479	444.171	890.986
119	4774.84	3130.35	2308.1			872.479	446.815	893.63
120	2498.46	1930.03	1890.37			872.479	446.815	896.274
121	1567.82	3997.54	2908.26			875.123	446.815	896.274
122	1134.22	2717.9	4232.85			875.123	449.459	898.918
123	3006.09	2538.12	3029.88			875.123	449.459	898.918
124	5028.65	2096.59	4867.38			877.767	454.747	898.918
125	4105.94	1427.69	2212.92			877.767	457.391	901.562
126	4306.87	4082.14	4343.89			880.411	460.034	901.562
127	2535.48	412.445	5776.87			880.411	462.678	904.206
128	3526.93	3751.66	3799.25			880.411	470.61	904.206
129	1541.38	341.06	4703.46			880.411	473.254	912.137
130	2773.43	1723.81	3614.18			883.055	473.254	912.137
131	4129.73	1877.15	1557.24			883.055	475.898	912.137
132	4216.98	4235.49	4724.61			885.698	475.898	914.781
133	3132.99	8603.17	2424.43			885.698	475.898	917.425
134	3220.24	3444.97	2329.25			888.342	478.542	920.069
135	4037.2	5837.68	3949.95			888.342	478.542	920.069
136	1023.18	2429.72	4544.82			890.986	481.185	922.713
137	2199.7	3421.18	3341.86			893.63	481.185	922.713
138	3645.91	3719.93	3455.55			896.274	486.473	925.357
139	4732.54	4090.08	3413.24			898.918	489.117	925.357
140	1168.59	4037.2	5430.52			898.918	489.117	925.357
141	4957.27	2477.31	4417.92			898.918	489.117	925.357
142	3883.85	4365.04	3616.82			898.918	491.761	928
143	1295.5	3762.24	5404.08			898.918	491.761	930.644
144	1017.89	3180.58	2273.73			898.918	491.761	930.644
145	1639.2	5419.95	1922.1			901.562	494.405	930.644
146	3635.33	2514.33	3712			901.562	494.405	933.288
147	1636.56	2551.34	4669.09			904.206	494.405	933.288
148	4328.03	11696.5	2963.78			904.206	494.405	941.22
149	2149.47	1467.35	2030.5			906.849	504.98	943.864
150	798.451	4121.8	2707.33			906.849	512.912	943.864
151	5147.63	4293.65	1771.4			906.849	515.556	943.864
152	4309.52	2347.76	1549.31			906.849	515.556	943.864
153	3452.9	4079.5	970.302			909.493	515.556	946.508
154	4571.26	6466.92	1826.92			909.493	515.556	946.508
155	3151.5	2027.85	3320.71			909.493	515.556	949.151
156	1292.86	6889.94	4288.37			912.137	518.2	949.151
157	2736.41	2101.88	4703.46			912.137	518.2	949.151
158	3772.81	2506.39	5295.68			914.781	518.2	951.795
159	2974.36	3590.38	4306.87			914.781	523.487	959.727
160	3265.19	3603.6	3503.14			914.781	523.487	965.015
161	5010.15	1570.46	4753.69			914.781	523.487	967.659
162	2863.32	2112.46	2030.5			920.069	526.131	967.659
163	1202.96	1279.64	2725.84			922.713	526.131	970.302
164	2702.04	2784	3841.55			922.713	526.131	970.302
165	3225.53	2083.37	4190.54			925.357	526.131	975.59
166	1644.49	1721.16	1057.55			930.644	528.775	975.59
167	4211.69	3212.31	4922.9			930.644	539.351	978.234
168	2432.37	407.157	4045.13			933.288	539.351	980.878
169	3661.77	2178.55	2123.03			933.288	541.995	983.522
170	3077.47	1266.42	3513.71			935.932	549.926	986.166
171	3204.38	3508.42	5316.83			935.932	552.57	988.81
172	3228.17	1988.19	655.681			938.576	552.57	991.453
173	3159.43	2522.26	4357.11			941.22	552.57	991.453
174	1335.16	12317.8	1647.13			941.22	555.214	994.097
175	4148.24	3767.52	1805.77			943.864	555.214	994.097
176	2905.62	1610.12	3458.19			943.864	555.214	996.741
177	4193.19	1306.07	3630.04			946.508	565.789	996.741
178	2117.74	883.055	2657.1			946.508	568.433	996.741
179	4571.26	1639.2	4142.95			946.508	568.433	999.385
180	1623.34	4116.51	2342.47			949.151	571.077	999.385
181	1485.86	3804.54	3574.52			949.151	571.077	999.385
182	2487.89	3825.69	1837.49			949.151	571.077	1002.03
183	4957.27	2686.18	1856			951.795	573.721	1002.03
184	3180.58	4441.71	4602.99			951.795	576.365	1007.32
185	4261.93	3960.53	3955.24			951.795	579.009	1009.96
186	3907.65	4156.17	4716.67			954.439	579.009	1009.96
187	4423.2	1832.21	4409.99			954.439	581.653	1009.96
188	3598.32	4248.71	2905.62			954.439	581.653	1009.96
189	3304.84	2358.34	2421.79			957.083	586.94	1009.96
190	1660.35	925.357	1020.54			959.727	586.94	1012.6
191	5092.11	460.034	3373.59			959.727	586.94	1012.6
192	4375.61	5203.15	2479.96			959.727	586.94	1012.6
193	3738.44	4357.11	2564.56			962.371	592.228	1012.6
194	3897.07	4449.64	2699.4			962.371	594.872	1012.6
195	1557.24	1573.11	4333.31			962.371	597.516	1015.25
196	1226.76	4835.65	4388.83			962.371	602.804	1015.25
197	1578.39	3770.17	2638.59			965.015	602.804	1015.25
198	2691.47	2257.87	3801.89			967.659	602.804	1015.25
199	2987.58	404.513	2207.64			967.659	602.804	1015.25
200	3429.11	2464.09	2337.19			967.659	605.448	1015.25
201	2810.44	5298.33	5287.75			967.659	605.448	1017.89
202	2791.93	15189.1	1446.2			972.946	613.379	1017.89
203	5084.17	634.53	822.245			972.946	613.379	1020.54
204	1353.66	16032.5	4365.04			975.59	616.023	1020.54
205	2797.22	3521.64	2477.31			975.59	618.667	1020.54
206	3468.77	2117.74	4116.51			978.234	618.667	1020.54
207	3172.65	4084.79	2913.55			978.234	621.311	1023.18
208	4465.51	1218.83	5139.69			980.878	623.955	1023.18
209	4854.16	4817.14	4121.8			980.878	626.599	1028.47
210	4243.42	1805.77	3801.89			980.878	626.599	1033.76
211	1327.23	1337.8	4076.86			980.878	629.242	1033.76
212	1152.73	1118.36	2199.7			980.878	629.242	1033.76
213	4100.65	8441.9	2363.63			991.453	629.242	1033.76
214	3085.4	3489.92	3310.13			991.453	634.53	1036.4
215	1126.29	1824.27	3667.06			991.453	634.53	1039.04
216	2374.2	4547.47	1919.45			994.097	634.53	1041.69
217	4465.51	12434.1	5002.21			994.097	639.818	1044.33
218	2197.06	2942.63	1588.97			994.097	645.106	1044.33
219	5364.42	9330.24	3622.11			996.741	645.106	1044.33
220	2080.73	4211.69	1869.22			999.385	647.75	1046.97
221	2585.71	3830.98	4425.85			1002.03	650.393	1046.97
222	713.847	4550.11	2183.84			1004.67	653.037	1046.97
223	4399.41	2702.04	4788.06			1004.67	653.037	1049.62
224	4016.05	967.659	1718.52			1009.96	653.037	1052.26
225	2939.99	1612.76	1499.08			1012.6	655.681	1052.26
226	1456.78	2746.99	2736.41			1015.25	655.681	1052.26
227	4822.43	3132.99	1644.49			1015.25	655.681	1054.91
228	2416.5	1200.32	3222.88			1015.25	658.325	1054.91
229	1425.05	396.581	3566.59			1017.89	660.969	1054.91
230	1652.42	3934.09	2080.73			1017.89	660.969	1054.91
231	1337.8	2744.34	2461.45			1020.54	660.969	1054.91
232	4037.2	1234.69	4166.75			1023.18	666.257	1057.55
233	4060.99	5057.73	4470.79			1023.18	666.257	1057.55
234	4431.14	1269.06	4343.89			1023.18	666.257	1057.55
235	4404.7	3912.94	2408.57			1023.18	668.901	1057.55
236	650.393	4616.21	2033.14			1025.82	674.188	1057.55
237	1480.57	3590.38	1393.32			1025.82	679.476	1060.19
238	4166.75	3645.91	3143.57			1025.82	684.764	1062.84
239	3727.87	1673.57	3815.11			1028.47	690.052	1062.84
240	1657.71	3587.74	4367.68			1031.11	695.339	1068.13
241	4737.83	4002.83	2807.8			1033.76	697.983	1068.13
242	4121.8	3989.61	1485.86			1033.76	697.983	1068.13
243	4121.8	2620.08	4060.99			1033.76	700.627	1073.41
244	5052.45	330.484	4132.38			1036.4	703.271	1073.41
245	3146.21	10644.2	2984.94			1036.4	703.271	1073.41
246	4610.92	3844.2	3021.95			1039.04	713.847	1076.06
247	3360.37	1356.31	3756.95			1039.04	716.49	1076.06
248	3878.57	3400.02	2154.76			1041.69	721.778	1078.7
249	3928.8	713.847	3780.74			1041.69	724.422	1078.7
250	4489.3	4074.21	1993.48			1041.69	724.422	1078.7
251	2659.74	5086.82	1530.8			1041.69	727.066	1081.35
252	1266.42	3381.52	2342.47			1041.69	732.354	1083.99
253	3146.21	2001.41	2910.91			1041.69	734.998	1083.99
254	3029.88	1578.39	3426.46			1044.33	734.998	1086.63
255	2337.19	2080.73	2059.58			1044.33	734.998	1089.28
256	2493.18	2273.73	3809.83			1044.33	737.641	1091.92
257	3460.83	3690.85	2326.61			1046.97	740.285	1097.21
258	4745.76	2236.72	2501.11			1046.97	742.929	1097.21
259	4859.44	4246.06	642.462			1046.97	745.573	1097.21
260	1192.39	2696.75	4238.13			1049.62	756.149	1097.21
261	5107.97	2535.48	3548.08			1049.62	766.724	1099.85
262	4399.41	3637.97	4195.83			1052.26	769.368	1099.85
263	4825.07	4060.99	2844.81			1052.26	772.012	1099.85
264	1216.18	6577.96	2688.82			1052.26	774.656	1102.5
265	2688.82	2130.96	2543.41			1054.91	782.587	1102.5
266	5232.23	6374.39	1044.33			1054.91	782.587	1102.5
267	3690.85	3563.94	1826.92			1054.91	782.587	1102.5
268	1237.33	396.581	3077.47			1060.19	785.231	1105.14
269	4330.67	2220.86	3849.48			1060.19	790.519	1105.14
270	3487.27	4465.51	1142.15			1062.84	790.519	1107.78
271	4074.21	1837.49	3299.56			1062.84	798.451	1107.78
272	4774.84	2271.09	4172.04			1062.84	803.738	1107.78
273	1491.15	1353.66	3048.39			1065.48	803.738	1110.43
274	2810.44	3132.99	2847.45			1065.48	806.382	1110.43
275	2789.29	2794.58	3881.21			1070.77	809.026	1110.43
276	4465.51	3148.86	2691.47			1070.77	809.026	1113.07
277	4674.37	832.821	1155.37			1073.41	814.314	1115.72
278	1723.81	4624.14	2445.59			1076.06	824.889	1115.72
279	2498.46	1477.93	3775.45			1076.06	827.533	1115.72
280	5031.3	4505.16	1652.42			1078.7	830.177	1115.72
281	1226.76	4917.61	3616.82			1078.7	832.821	1118.36
282	5324.77	1628.63	3563.94			1081.35	832.821	1118.36
283	4021.34	5470.18	3907.65			1081.35	838.109	1118.36
284	1813.7	2458.8	2598.93			1081.35	840.753	1118.36
285	2445.59	515.556	2226.14			1081.35	851.328	1126.29
286	4870.02	10290	4457.57			1086.63	853.972	1126.29
287	2281.66	1454.13	2123.03			1086.63	853.972	1126.29
288	4320.09	827.533	1644.49			1086.63	856.616	1128.94
289	1525.52	1530.8	1099.85			1086.63	861.904	1128.94
290	4301.59	1401.25	3484.63			1089.28	861.904	1128.94
291	4349.18	3489.92	4172.04			1089.28	864.547	1131.58
292	3090.69	3796.61	1189.74			1089.28	864.547	1131.58
293	2675.6	1776.68	3635.33			1089.28	864.547	1134.22
294	4158.82	6522.44	4507.81			1091.92	864.547	1134.22
295	1625.98	1308.72	1351.02			1094.56	869.835	1136.87
296	1551.96	4201.12	3122.42			1094.56	869.835	1136.87
297	2884.47	1681.51	2437.65			1097.21	877.767	1139.51
298	3928.8	4055.71	3883.85			1099.85	880.411	1139.51
299	4766.91	1327.23	2945.28			1099.85	880.411	1142.15
300	5538.92	2715.26	3622.11			1099.85	883.055	1142.15
301	4100.65	4280.44	1102.5			1099.85	890.986	1147.44
302	1541.38	3407.96	2231.43			1099.85	896.274	1147.44
303	4407.34	2083.37	2479.96			1099.85	898.918	1150.09
304	4708.74	2757.56	3881.21			1099.85	898.918	1150.09
305	954.439	1131.58	3770.17			1102.5	901.562	1150.09
306	3844.2	348.992	3487.27			1102.5	904.206	1152.73
307	1202.96	3341.86	3627.4			1105.14	906.849	1155.37
308	999.385	5993.67	4161.46			1105.14	909.493	1155.37
309	1840.14	8151.07	4809.21			1107.78	912.137	1155.37
310	5885.27	1538.74	1834.85			1107.78	912.137	1158.02
311	2762.85	5086.82	7492.74			1107.78	912.137	1160.66
312	1882.44	9280	3090.69			1107.78	917.425	1160.66
313	1837.49	1559.89	2181.2			1110.43	920.069	1160.66
314	2667.67	2926.77	4470.79			1110.43	925.357	1160.66
315	3188.51	5345.92	4378.26			1110.43	928	1160.66
316	1184.46	5441.1	3135.64			1110.43	928	1160.66
317	3455.55	2984.94	1893.02			1113.07	930.644	1163.31
318	3751.66	2204.99	2963.78			1113.07	941.22	1163.31
319	4753.69	3674.99	1953.82			1113.07	946.508	1163.31
320	5203.15	7942.2	1686.79			1113.07	946.508	1163.31
321	4788.06	565.789	2284.31			1113.07	949.151	1163.31
322	750.861	3413.24	3833.62			1113.07	949.151	1165.95
323	3394.74	1150.09	3873.28			1115.72	949.151	1165.95
324	2913.55	1015.25	3489.92			1115.72	949.151	1168.59
325	1768.75	1771.4	4219.63			1115.72	949.151	1168.59
326	4386.19	3984.32	3246.68			1115.72	949.151	1171.24
327	2585.71	3529.57	2387.42			1118.36	949.151	1173.88
328	660.969	4896.46	1604.83			1121	954.439	1173.88
329	3286.34	2263.16	3926.16			1121	957.083	1176.52
330	3162.08	3558.66	3214.95			1121	957.083	1179.17
331	2421.79	3373.59	3101.27			1123.65	959.727	1179.17
332	5012.79	3603.6	3156.79			1123.65	959.727	1179.17
333	4933.47	3000.8	1562.53			1126.29	962.371	1179.17
334	1158.02	1784.62	3138.28			1126.29	965.015	1179.17
335	3886.5	4248.71	1808.41			1126.29	965.015	1181.81
336	4616.21	864.547	3651.19			1126.29	967.659	1181.81
337	4534.25	454.747	2781.36			1126.29	967.659	1184.46
338	4071.57	333.128	2770.78			1126.29	970.302	1184.46
339	5084.17	2271.09	758.792			1126.29	972.946	1187.1
340	5277.18	4066.28	4298.94			1128.94	972.946	1187.1
341	3130.35	5036.58	1948.54			1128.94	975.59	1187.1
342	2699.4	4439.07	3415.89			1131.58	978.234	1189.74
343	5094.75	3151.5	3585.1			1131.58	991.453	1189.74
344	4507.81	3304.84	2924.13			1134.22	1004.67	1192.39
345	2847.45	2165.33	3357.72			1134.22	1004.67	1192.39
346	4306.87	2678.25	3976.39			1134.22	1012.6	1195.03
347	1570.46	2773.43	925.357			1136.87	1015.25	1195.03
348	1012.6	4769.55	5187.28			1139.51	1017.89	1195.03
349	2855.39	2955.85	3500.49			1139.51	1020.54	1195.03
350	1681.51	3812.47	4132.38			1139.51	1020.54	1197.68
351	4272.5	3032.53	994.097			1139.51	1023.18	1197.68
352	4243.42	2712.62	2054.29			1139.51	1028.47	1197.68
353	1343.09	7550.91	4092.72			1142.15	1028.47	1200.32
354	3363.01	1049.62	3656.48			1142.15	1028.47	1202.96
355	4023.98	9570.83	3199.09			1142.15	1033.76	1202.96
356	4991.64	5372.36	3619.47			1144.8	1044.33	1205.61
357	1475.28	3056.32	2120.39			1147.44	1046.97	1205.61
358	1210.9	954.439	1985.55			1147.44	1049.62	1205.61
359	3627.4	1903.59	2635.94			1147.44	1054.91	1205.61
360	4833.01	1908.88	1229.4			1150.09	1054.91	1205.61
361	4698.17	2987.58	3386.81			1150.09	1054.91	1210.9
362	3132.99	949.151	2649.16			1152.73	1062.84	1213.54
363	1462.06	3820.4	1803.12			1152.73	1068.13	1213.54
364	4679.66	3228.17	1012.6			1152.73	1068.13	1216.18
365	1763.47	1105.14	1591.61			1155.37	1070.77	1218.83
366	1514.94	3466.12	2479.96			1158.02	1076.06	1218.83
367	1890.37	8053.25	1229.4			1158.02	1078.7	1221.47
368	1065.48	2033.14	2112.46			1158.02	1091.92	1221.47
369	3664.41	1507.01	2086.02			1158.02	1091.92	1221.47
370	2926.77	838.109	3156.79			1160.66	1102.5	1221.47
371	1015.25	2244.65	1530.8			1160.66	1105.14	1221.47
372	4365.04	4428.49	2347.76			1160.66	1107.78	1221.47
373	1681.51	489.117	1982.91			1160.66	1118.36	1224.11
374	1993.48	3772.81	3889.14			1163.31	1121	1226.76
375	2905.62	478.542	848.684			1165.95	1123.65	1226.76
376	2382.13	5092.11	1446.2			1165.95	1123.65	1226.76
377	4698.17	809.026	3347.15			1165.95	1128.94	1229.4
378	5139.69	2516.97	4494.59			1165.95	1128.94	1229.4
379	3302.2	3045.75	2485.24			1165.95	1131.58	1229.4
380	4240.78	1721.16	3439.68			1165.95	1134.22	1229.4
381	2712.62	3616.82	2699.4			1165.95	1139.51	1229.4
382	2953.21	6120.57	3635.33			1168.59	1147.44	1229.4
383	843.396	1951.18	3809.83			1168.59	1150.09	1232.05
384	2210.28	4119.16	2323.97			1171.24	1155.37	1232.05
385	1242.62	4166.75	1924.74			1171.24	1158.02	1232.05
386	3587.74	2828.95	2593.64			1171.24	1160.66	1234.69
387	3326	1012.6	1591.61			1176.52	1163.31	1237.33
388	4996.93	2358.34	2844.81			1176.52	1168.59	1239.98
389	5219.01	2577.78	2236.72			1179.17	1176.52	1245.27
390	4671.73	3645.91	2218.21			1179.17	1176.52	1245.27
391	2982.29	4010.76	1483.21			1179.17	1179.17	1245.27
392	2456.16	3394.74	1631.27			1181.81	1179.17	1247.91
393	3019.31	4330.67	4111.23			1181.81	1179.17	1247.91
394	4198.48	1247.91	2704.69			1184.46	1181.81	1247.91
395	2733.77	2691.47	727.066			1184.46	1181.81	1247.91
396	4526.32	1409.19	4444.36			1184.46	1192.39	1250.55
397	1139.51	1795.19	3434.39			1184.46	1195.03	1250.55
398	2398	2474.67	1792.55			1184.46	1200.32	1253.2
399	2643.88	1726.45	4349.18			1184.46	1202.96	1253.2
400	4790.7	1694.72	1768.75			1187.1	1205.61	1253.2
401	5293.04	3783.39	3111.84			1189.74	1205.61	1255.84
402	3167.36	2011.99	1612.76			1189.74	1208.25	1255.84
403	1644.49	4595.06	3307.49			1189.74	1208.25	1258.48
404	1491.15	2995.51	1618.05			1189.74	1210.9	1258.48
405	2744.34	1842.78	1850.71			1189.74	1210.9	1266.42
406	2009.35	1237.33	2643.88			1189.74	1213.54	1266.42
407	1216.18	2300.17	1811.06			1192.39	1216.18	1269.06
408	4256.64	5084.17	1168.59			1192.39	1216.18	1269.06
409	5073.6	4063.64	2913.55			1192.39	1218.83	1271.7
410	2210.28	1454.13	2635.94			1192.39	1218.83	1271.7
411	5039.23	4211.69	3064.25			1192.39	1221.47	1271.7
412	1340.45	2982.29	2628.01			1195.03	1221.47	1271.7
413	1321.94	721.778	2725.84			1195.03	1221.47	1274.35
414	3249.32	3251.97	2657.1			1197.68	1224.11	1274.35
415	3058.96	4111.23	2078.09			1197.68	1229.4	1276.99
416	4222.27	4650.58	4394.12			1200.32	1229.4	1279.64
417	2006.7	3384.16	2191.77			1200.32	1232.05	1279.64
418	3574.52	3521.64	3349.79			1200.32	1232.05	1279.64
419	4232.85	2234.08	4357.11			1200.32	1232.05	1279.64
420	3156.79	1179.17	1697.37			1202.96	1234.69	1282.28
421	6189.31	1054.91	2279.02			1202.96	1234.69	1282.28
422	4843.58	3566.59	1781.97			1202.96	1234.69	1282.28
423	1485.86	4957.27	3741.08			1202.96	1237.33	1282.28
424	2025.21	3312.78	5615.59			1205.61	1237.33	1287.57
425	3891.79	1935.32	2228.79			1205.61	1242.62	1287.57
426	4105.94	1417.12	2807.8			1205.61	1242.62	1290.21
427	2749.63	1028.47	3146.21			1205.61	1242.62	1290.21
428	5039.23	2144.18	3571.88			1208.25	1245.27	1290.21
429	5269.24	10163.1	1483.21			1208.25	1247.91	1292.86
430	2823.66	3791.32	3434.39			1208.25	1247.91	1295.5
431	2004.06	2876.54	1747.6			1208.25	1250.55	1295.5
432	3370.94	1586.33	1062.84			1210.9	1250.55	1295.5
433	4050.42	9763.83	2247.29			1210.9	1255.84	1298.14
434	4568.62	6591.18	2659.74			1213.54	1255.84	1298.14
435	3577.16	1636.56	1509.65			1213.54	1261.13	1298.14
436	2625.37	1224.11	3378.87			1216.18	1261.13	1300.79
437	4671.73	11091.1	3117.13			1216.18	1263.77	1303.43
438	2263.16	906.849	1538.74			1216.18	1266.42	1303.43
439	2503.75	3706.71	2596.29			1216.18	1266.42	1303.43
440	2456.16	20902.5	750.861			1221.47	1269.06	1303.43
441	1528.16	2413.86	4053.06			1221.47	1269.06	1306.07
442	4325.38	2323.97	2136.25			1224.11	1276.99	1306.07
443	2995.51	4251.35	3410.6			1224.11	1279.64	1306.07
444	2178.55	1308.72	1644.49			1226.76	1279.64	1306.07
445	5755.72	1398.61	1591.61			1226.76	1282.28	1306.07
446	3725.22	1525.52	2411.21			1226.76	1287.57	1308.72
447	4951.98	2932.06	2408.57			1226.76	1287.57	1308.72
448	4357.11	3051.03	2323.97			1226.76	1287.57	1308.72
449	3000.8	4859.44	832.821			1229.4	1290.21	1308.72
450	1427.69	2120.39	3196.45			1229.4	1292.86	1311.36
451	3730.51	526.131	3963.17			1229.4	1295.5	1314.01
452	1131.58	7228.36	750.861			1229.4	1295.5	1319.29
453	4491.95	5115.9	1633.92			1229.4	1298.14	1319.29
454	2115.1	2884.47	3246.68			1229.4	1298.14	1319.29
455	3846.84	2154.76	1581.04			1232.05	1298.14	1321.94
456	2339.83	1858.64	3106.55			1232.05	1298.14	1321.94
457	3833.62	6961.33	3616.82			1234.69	1298.14	1321.94
458	3656.48	1948.54	2424.43			1234.69	1300.79	1324.58
459	2416.5	5980.45	2746.99			1234.69	1303.43	1324.58
460	851.328	1900.95	1483.21			1237.33	1303.43	1327.23
461	1700.01	3905	4346.53			1237.33	1306.07	1329.87
462	2049	3508.42	3341.86			1237.33	1306.07	1329.87
463	4587.12	6458.99	3386.81			1239.98	1306.07	1329.87
464	2842.17	2392.71	1414.47			1239.98	1308.72	1329.87
465	1755.53	4322.74	1200.32			1239.98	1308.72	1329.87
466	4425.85	4037.2	1210.9			1242.62	1308.72	1332.51
467	2115.1	1604.83	3674.99			1245.27	1308.72	1332.51
468	4166.75	1361.6	1922.1			1245.27	1308.72	1332.51
469	2405.93	2826.3	2202.35			1247.91	1311.36	1335.16
470	3008.73	5118.54	2704.69			1247.91	1314.01	1335.16
471	3053.68	3976.39	2707.33			1247.91	1314.01	1335.16
472	2273.73	4008.12	2805.15			1247.91	1316.65	1337.8
473	795.807	1567.82	3384.16			1250.55	1327.23	1337.8
474	3820.4	4023.98	1443.56			1250.55	1327.23	1337.8
475	2477.31	4105.94	3386.81			1253.2	1332.51	1340.45
476	4909.68	2680.89	3217.6			1255.84	1332.51	1340.45
477	5589.15	3214.95	1015.25			1258.48	1335.16	1340.45
478	4624.14	4343.89	2945.28			1258.48	1337.8	1340.45
479	2009.35	2154.76	3923.51			1261.13	1340.45	1343.09
480	1467.35	504.98	1380.1			1261.13	1345.73	1343.09
481	4343.89	2395.35	4150.89			1261.13	1348.38	1343.09
482	3891.79	2019.92	1840.14			1263.77	1353.66	1343.09
483	1491.15	3080.12	2279.02			1263.77	1356.31	1345.73
484	4296.3	1557.24	3228.17			1266.42	1361.6	1348.38
485	4216.98	4169.39	1636.56			1269.06	1361.6	1348.38
486	3754.3	4243.42	3738.44			1269.06	1361.6	1348.38
487	4690.24	3368.3	3862.7			1269.06	1366.88	1351.02
488	3749.02	1306.07	1887.73			1271.7	1377.46	1351.02
489	3632.69	1988.19	2223.5			1271.7	1382.75	1351.02
490	1623.34	16370.9	2905.62			1274.35	1382.75	1353.66
491	3066.9	5377.64	2646.52			1274.35	1385.39	1356.31
492	1517.58	3302.2	3883.85			1274.35	1385.39	1356.31
493	1216.18	1419.76	3212.31			1276.99	1388.03	1358.95
494	4256.64	2067.51	2107.17			1276.99	1390.68	1358.95
495	2215.57	1250.55	3207.02			1276.99	1395.97	1358.95
496	4187.9	3368.3	2009.35			1276.99	1398.61	1361.6
497	3074.83	4724.61	1911.52			1276.99	1398.61	1364.24
498	2054.29	2815.73	3600.96			1276.99	1398.61	1364.24
499	3156.79	4224.91	4259.28			1279.64	1401.25	1364.24
500	4605.63	660.969	3183.23			1282.28	1401.25	1369.53
501	4251.35	4536.89	2043.72			1282.28	1401.25	1369.53
502	4473.44	3593.03	3852.13			1282.28	1403.9	1372.17
503	1234.69	2371.56	2916.2			1284.92	1406.54	1372.17
504	1073.41	1620.7	2083.37			1284.92	1409.19	1372.17
505	803.738	549.926	1774.04			1284.92	1409.19	1372.17
506	3566.59	364.855	1710.59			1284.92	1409.19	1372.17
507	1549.31	4877.95	3622.11			1284.92	1409.19	1372.17
508	3185.87	4465.51	819.602			1287.57	1417.12	1372.17
509	660.969	2575.14	3045.75			1287.57	1417.12	1374.82
510	3109.2	2881.82	2760.21			1287.57	1417.12	1374.82
511	4795.99	2937.35	3378.87			1290.21	1419.76	1374.82
512	3963.17	2360.98	3421.18			1290.21	1419.76	1377.46
513	1610.12	3489.92	1602.19			1290.21	1419.76	1377.46
514	2971.72	4230.2	1012.6			1292.86	1425.05	1377.46
515	1316.65	4243.42	3043.1			1292.86	1425.05	1380.1
516	5475.47	2556.63	2694.11			1292.86	1427.69	1380.1
517	4714.03	3709.36	3080.12			1295.5	1427.69	1380.1
518	4423.2	3138.28	1430.34			1295.5	1427.69	1380.1
519	3500.49	3661.77	3770.17			1295.5	1432.98	1382.75
520	3680.28	1158.02	3029.88			1295.5	1432.98	1382.75
521	3532.22	2839.52	922.713			1295.5	1438.27	1382.75
522	3926.16	3103.91	1766.11			1295.5	1440.91	1382.75
523	660.969	2977	2694.11			1298.14	1440.91	1385.39
524	851.328	851.328	1581.04			1303.43	1446.2	1388.03
525	2546.05	880.411	2281.66			1303.43	1446.2	1390.68
526	2302.82	5044.52	1877.15			1306.07	1446.2	1390.68
527	880.411	4761.62	2464.09			1306.07	1448.84	1390.68
528	1160.66	3730.51	3027.24			1308.72	1448.84	1390.68
529	1570.46	375.43	1430.34			1308.72	1448.84	1393.32
530	2945.28	1737.03	3442.33			1308.72	1454.13	1393.32
531	1443.56	1789.9	1826.92			1308.72	1454.13	1398.61
532	3103.91	4589.77	3397.38			1311.36	1454.13	1398.61
533	4428.49	3138.28	1089.28			1314.01	1454.13	1398.61
534	2598.93	2654.45	3233.46			1316.65	1456.78	1401.25
535	838.109	2776.07	3783.39			1316.65	1462.06	1401.25
536	1155.37	4246.06	4029.27			1316.65	1462.06	1401.25
537	1850.71	2905.62	3780.74			1316.65	1467.35	1403.9
538	3519	2347.76	2011.99			1316.65	1467.35	1403.9
539	922.713	3619.47	4230.2			1319.29	1467.35	1406.54
540	4090.08	1850.71	3926.16			1321.94	1470	1406.54
541	4415.27	523.487	3106.55			1321.94	1470	1406.54
542	2831.59	1586.33	3452.9			1321.94	1470	1406.54
543	1625.98	1475.28	2913.55			1324.58	1472.64	1406.54
544	2606.86	2625.37	1686.79			1327.23	1472.64	1409.19
545	4127.09	5660.54	3714.65			1327.23	1475.28	1409.19
546	3942.02	1628.63	4235.49			1327.23	1477.93	1409.19
547	3791.32	4552.75	3910.29			1329.87	1483.21	1411.83
548	4195.83	3756.95	3484.63			1329.87	1488.5	1411.83
549	1314.01	4338.6	682.12			1329.87	1488.5	1414.47
550	1869.22	2220.86	3373.59			1332.51	1491.15	1414.47
551	3246.68	1512.3	1514.94			1332.51	1491.15	1417.12
552	2162.69	1438.27	1665.64			1335.16	1493.79	1419.76
553	1631.27	3207.02	2360.98			1335.16	1499.08	1422.41
554	3556.01	571.077	3188.51			1337.8	1507.01	1422.41
555	5285.11	941.22	4145.6			1337.8	1509.65	1422.41
556	2818.37	388.65	3474.05			1337.8	1512.3	1422.41
557	3979.03	2218.21	3931.44			1340.45	1512.3	1425.05
558	4748.4	1924.74	2929.41			1340.45	1512.3	1425.05
559	1308.72	3585.1	1176.52			1343.09	1514.94	1427.69
560	4026.62	655.681	2768.14			1343.09	1514.94	1427.69
561	2194.42	2353.05	2440.3			1345.73	1514.94	1427.69
562	4510.45	330.484	846.04			1345.73	1517.58	1430.34
563	2955.85	1863.93	1826.92			1345.73	1517.58	1430.34
564	4764.26	3447.61	3138.28			1345.73	1517.58	1430.34
565	994.097	4394.12	3511.07			1345.73	1522.87	1432.98
566	814.314	2778.71	1276.99			1348.38	1525.52	1435.62
567	3437.04	4021.34	3363.01			1348.38	1525.52	1435.62
568	3942.02	1538.74	1216.18			1348.38	1525.52	1435.62
569	1258.48	3199.09	920.069			1351.02	1525.52	1438.27
570	5308.9	3556.01	3045.75			1351.02	1528.16	1438.27
571	2136.25	1255.84	1533.45			1353.66	1530.8	1438.27
572	2741.7	2916.2	3749.02			1353.66	1538.74	1443.56
573	2482.6	2355.69	3040.46			1356.31	1538.74	1443.56
574	1758.18	2252.58	1279.64			1358.95	1538.74	1446.2
575	4412.63	396.581	1152.73			1358.95	1541.38	1446.2
576	2035.78	2183.84	2091.31			1358.95	1544.02	1446.2
577	3484.63	3569.23	1776.68			1361.6	1544.02	1446.2
578	782.587	3236.1	4288.37			1361.6	1551.96	1446.2
579	2765.49	1332.51	3682.92			1364.24	1554.6	1446.2
580	3947.31	2144.18	1282.28			1364.24	1554.6	1448.84
581	2342.47	2011.99	1755.53			1366.88	1554.6	1448.84
582	1668.29	2987.58	2641.23			1366.88	1557.24	1451.49
583	1982.91	4291.01	4224.91			1366.88	1557.24	1454.13
584	3170.01	1692.08	1205.61			1369.53	1559.89	1454.13
585	965.015	1789.9	835.465			1372.17	1559.89	1454.13
586	4288.37	618.667	2112.46			1372.17	1562.53	1456.78
587	875.123	3548.08	3029.88			1372.17	1562.53	1459.42
588	2464.09	4145.6	3214.95			1372.17	1562.53	1459.42
589	2744.34	319.909	3132.99			1372.17	1565.17	1459.42
590	1274.35	6252.77	2181.2			1372.17	1567.82	1462.06
591	2802.51	3733.15	1935.32			1374.82	1567.82	1462.06
592	2175.91	378.074	1895.66			1374.82	1570.46	1464.71
593	1760.82	4026.62	1737.03			1377.46	1570.46	1464.71
594	3450.26	1427.69	2635.94			1377.46	1570.46	1464.71
595	1491.15	4494.59	2376.84			1377.46	1573.11	1467.35
596	3072.18	4563.33	4880.6			1377.46	1573.11	1467.35
597	1287.57	2191.77	880.411			1380.1	1573.11	1467.35
598	1451.49	2387.42	1533.45			1380.1	1575.75	1467.35
599	1639.2	409.801	2641.23			1380.1	1578.39	1470
600	3836.26	5570.65	3389.45			1382.75	1578.39	1472.64
601	1107.78	5602.37	2961.14			1382.75	1578.39	1475.28
602	2178.55	1234.69	1541.38			1382.75	1578.39	1475.28
603	1316.65	391.294	1787.26			1385.39	1581.04	1475.28
604	3373.59	457.391	1768.75			1388.03	1581.04	1477.93
605	2353.05	19924.2	1348.38			1388.03	1581.04	1477.93
606	4092.72	7392.28	4185.26			1390.68	1581.04	1477.93
607	1863.93	3082.76	2789.29			1390.68	1586.33	1477.93
608	1271.7	11051.4	3587.74			1390.68	1586.33	1477.93
609	2977	2876.54	1044.33			1390.68	1586.33	1477.93
610	2543.41	415.089	2939.99			1393.32	1586.33	1480.57
611	2509.04	4973.13	2236.72			1393.32	1588.97	1480.57
612	2167.98	3119.77	2992.87			1393.32	1596.9	1480.57
613	3016.66	2881.82	2601.57			1393.32	1599.54	1483.21
614	4111.23	333.128	1475.28			1395.97	1604.83	1483.21
615	4970.49	930.644	3188.51			1395.97	1604.83	1483.21
616	4885.88	2918.84	2728.48			1395.97	1607.48	1485.86
617	4142.95	4243.42	1184.46			1395.97	1607.48	1485.86
618	2744.34	1826.92	2070.15			1401.25	1607.48	1485.86
619	3183.23	4288.37	1020.54			1401.25	1610.12	1485.86
620	1734.38	4328.03	2799.86			1401.25	1610.12	1488.5
621	3870.63	2503.75	2945.28			1406.54	1612.76	1491.15
622	4338.6	1314.01	4177.32			1406.54	1612.76	1499.08
623	1430.34	1557.24	3249.32			1406.54	1615.41	1499.08
624	4335.96	1948.54	2210.28			1406.54	1620.7	1504.37
625	1721.16	1192.39	1245.27			1409.19	1620.7	1504.37
626	6263.34	3228.17	946.508			1409.19	1625.98	1504.37
627	4153.53	2376.84	2366.27			1411.83	1625.98	1507.01
628	2818.37	5039.23	1012.6			1411.83	1625.98	1509.65
629	1731.74	3986.97	2992.87			1411.83	1628.63	1509.65
630	2493.18	5983.09	2683.53			1411.83	1628.63	1509.65
631	1663	809.026	2897.69			1417.12	1631.27	1509.65
632	2178.55	3487.27	674.188			1417.12	1631.27	1509.65
633	1160.66	1263.77	4000.18			1417.12	1633.92	1509.65
634	3891.79	1697.37	3801.89			1419.76	1636.56	1509.65
635	3815.11	700.627	2149.47			1419.76	1636.56	1509.65
636	2043.72	2234.08	1618.05			1419.76	1636.56	1512.3
637	1792.55	2844.81	4560.69			1422.41	1636.56	1514.94
638	2879.18	5105.32	1649.78			1422.41	1639.2	1514.94
639	1295.5	494.405	3852.13			1422.41	1639.2	1514.94
640	2353.05	3283.69	4058.35			1422.41	1639.2	1517.58
641	1842.78	491.761	2916.2			1422.41	1639.2	1517.58
642	1919.45	6517.15	2932.06			1422.41	1647.13	1517.58
643	3722.58	1863.93	1861.29			1425.05	1649.78	1517.58
644	1200.32	2633.3	2276.38			1425.05	1649.78	1520.23
645	1578.39	1961.76	3066.9			1425.05	1649.78	1520.23
646	3947.31	2429.72	1893.02			1425.05	1655.07	1520.23
647	3487.27	1046.97	3534.86			1427.69	1657.71	1520.23
648	1760.82	4277.79	2371.56			1427.69	1663	1522.87
649	914.781	3704.07	1319.29			1427.69	1668.29	1522.87
650	3513.71	388.65	4098.01			1427.69	1668.29	1522.87
651	4555.4	4431.14	3593.03			1427.69	1668.29	1525.52
652	3154.14	1210.9	1636.56			1430.34	1670.93	1528.16
653	3072.18	10171	4068.93			1432.98	1670.93	1528.16
654	2924.13	3177.94	4132.38			1435.62	1670.93	1528.16
655	975.59	3077.47	2059.58			1435.62	1673.57	1530.8
656	4962.56	3875.92	1459.42			1435.62	1673.57	1530.8
657	2146.83	3762.24	1665.64			1435.62	1673.57	1530.8
658	2821.02	6184.03	801.094			1438.27	1681.51	1533.45
659	1422.41	1432.98	3418.53			1438.27	1681.51	1533.45
660	4589.77	4153.53	1390.68			1438.27	1681.51	1533.45
661	3637.97	3249.32	3844.2			1438.27	1684.15	1538.74
662	2744.34	1517.58	1427.69			1440.91	1684.15	1541.38
663	3934.09	946.508	3458.19			1440.91	1684.15	1541.38
664	3883.85	8854.34	3410.6			1443.56	1689.44	1541.38
665	1668.29	2704.69	2027.85			1443.56	1692.08	1541.38
666	2609.51	1919.45	3844.2			1443.56	1692.08	1544.02
667	2712.62	1684.15	1467.35			1446.2	1694.72	1544.02
668	1438.27	1068.13	3384.16			1446.2	1694.72	1546.67
669	1816.34	1625.98	1480.57			1446.2	1694.72	1549.31
670	3429.11	967.659	1803.12			1446.2	1694.72	1549.31
671	1692.08	425.664	2464.09			1448.84	1697.37	1549.31
672	3019.31	2556.63	1181.81			1448.84	1697.37	1549.31
673	1390.68	1216.18	1898.3			1451.49	1700.01	1549.31
674	4698.17	515.556	1879.8			1451.49	1702.66	1551.96
675	2265.8	407.157	2313.39			1451.49	1702.66	1551.96
676	2516.97	2532.83	1544.02			1454.13	1705.3	1551.96
677	1427.69	1232.05	1343.09			1456.78	1705.3	1551.96
678	3669.7	890.986	2749.63			1456.78	1705.3	1551.96
679	3770.17	333.128	867.191			1456.78	1707.94	1551.96
680	4999.57	4827.72	1314.01			1456.78	1707.94	1554.6
681	4029.27	1842.78	1853.36			1456.78	1707.94	1554.6
682	658.325	2588.35	3336.57			1456.78	1715.88	1557.24
683	3103.91	449.459	3175.3			1456.78	1718.52	1557.24
684	2059.58	1448.84	2678.25			1459.42	1718.52	1557.24
685	4243.42	3476.7	1882.44			1459.42	1721.16	1557.24
686	3791.32	3645.91	1266.42			1462.06	1721.16	1557.24
687	2374.2	2043.72	3852.13			1462.06	1721.16	1557.24
688	2614.79	3241.39	3579.81			1462.06	1723.81	1557.24
689	4803.92	4425.85	3352.43			1464.71	1726.45	1557.24
690	2604.22	449.459	1551.96			1467.35	1726.45	1559.89
691	3645.91	1467.35	682.12			1467.35	1726.45	1562.53
692	1358.95	4449.64	3051.03			1467.35	1726.45	1562.53
693	1094.56	4142.95	1676.22			1467.35	1729.09	1565.17
694	3545.44	10736.8	1179.17			1470	1729.09	1565.17
695	4172.04	1409.19	1049.62			1472.64	1731.74	1567.82
696	4788.06	679.476	2939.99			1475.28	1731.74	1567.82
697	2244.65	3082.76	3844.2			1475.28	1734.38	1567.82
698	2427.08	2199.7	2577.78			1475.28	1737.03	1567.82
699	978.234	2125.68	2099.24			1475.28	1739.67	1567.82
700	1871.86	2421.79	2643.88			1477.93	1747.6	1573.11
701	4539.54	734.998	835.465			1477.93	1750.25	1575.75
702	3698.78	949.151	2524.9			1480.57	1752.89	1578.39
703	1639.2	4822.43	3016.66			1480.57	1752.89	1578.39
704	2342.47	1937.96	1319.29			1480.57	1755.53	1581.04
705	3185.87	2022.57	3566.59			1483.21	1758.18	1581.04
706	2001.41	2744.34	1015.25			1483.21	1758.18	1581.04
707	3637.97	3590.38	1467.35			1483.21	1758.18	1581.04
708	4412.63	2350.41	2136.25			1483.21	1760.82	1583.68
709	1874.51	666.257	1044.33			1483.21	1760.82	1583.68
710	4039.84	1456.78	2416.5			1485.86	1771.4	1583.68
711	3630.04	645.106	2435.01			1485.86	1774.04	1583.68
712	2329.25	2506.39	2464.09			1485.86	1776.68	1586.33
713	946.508	4780.13	3870.63			1485.86	1779.33	1586.33
714	2897.69	2281.66	4462.86			1488.5	1779.33	1586.33
715	1573.11	3214.95	930.644			1488.5	1779.33	1586.33
716	3799.25	370.143	2281.66			1488.5	1779.33	1586.33
717	1787.26	4063.64	1438.27			1491.15	1781.97	1588.97
718	4626.78	5544.21	2292.24			1491.15	1784.62	1588.97
719	3791.32	2844.81	1620.7			1491.15	1784.62	1591.61
720	1089.28	5002.21	890.986			1491.15	1784.62	1591.61
721	890.986	832.821	3545.44			1491.15	1787.26	1591.61
722	1401.25	4870.02	2717.9			1491.15	1789.9	1591.61
723	3051.03	4042.49	690.052			1493.79	1789.9	1591.61
724	2895.04	4420.56	793.163			1493.79	1789.9	1591.61
725	6128.5	2049	1567.82			1493.79	1789.9	1591.61
726	2181.2	1789.9	4954.62			1496.43	1795.19	1594.26
727	1871.86	3394.74	782.587			1496.43	1803.12	1594.26
728	3460.83	2056.94	1615.41			1496.43	1805.77	1594.26
729	2546.05	1729.09	1977.62			1496.43	1811.06	1594.26
730	1279.64	4103.3	2672.96			1496.43	1811.06	1596.9
731	4851.51	2009.35	3447.61			1496.43	1816.34	1596.9
732	1980.26	2080.73	2612.15			1499.08	1816.34	1596.9
733	4877.95	3730.51	2506.39			1499.08	1818.99	1596.9
734	3939.38	1890.37	2871.25			1499.08	1824.27	1596.9
735	4941.4	3603.6	1327.23			1501.72	1824.27	1602.19
736	1385.39	2720.55	1718.52			1501.72	1824.27	1602.19
737	2784	4179.97	785.231			1504.37	1826.92	1602.19
738	1282.28	2350.41	3114.49			1504.37	1826.92	1604.83
739	2424.43	5110.61	5512.48			1504.37	1826.92	1604.83
740	1475.28	3368.3	1221.47			1507.01	1829.56	1607.48
741	1660.35	1287.57	2035.78			1507.01	1829.56	1607.48
742	3392.09	518.2	2249.94			1509.65	1832.21	1610.12
743	3384.16	7196.63	2591			1509.65	1837.49	1610.12
744	4764.26	6181.38	1414.47			1509.65	1837.49	1612.76
745	1811.06	2876.54	1678.86			1514.94	1840.14	1612.76
746	4706.1	5102.68	1337.8			1514.94	1840.14	1615.41
747	2395.35	375.43	3574.52			1514.94	1840.14	1615.41
748	2757.56	3788.67	4724.61			1517.58	1842.78	1618.05
749	3307.49	3431.75	3793.96			1517.58	1842.78	1618.05
750	3008.73	3693.49	2850.1			1517.58	1842.78	1618.05
751	4433.78	3915.58	1303.43			1520.23	1845.43	1618.05
752	1239.98	949.151	1578.39			1520.23	1845.43	1620.7
753	3984.32	2437.65	1499.08			1522.87	1848.07	1620.7
754	1234.69	1300.79	3563.94			1525.52	1850.71	1625.98
755	851.328	4211.69	1115.72			1525.52	1850.71	1625.98
756	2178.55	1818.99	1419.76			1525.52	1850.71	1625.98
757	1237.33	1247.91	3363.01			1525.52	1853.36	1628.63
758	2363.63	2707.33	1863.93			1528.16	1856	1631.27
759	1475.28	4238.13	2239.36			1528.16	1856	1631.27
760	3106.55	4597.7	1583.68			1528.16	1858.64	1631.27
761	3281.05	1840.14	1160.66			1528.16	1858.64	1633.92
762	2559.27	5750.43	1007.32			1530.8	1861.29	1633.92
763	1919.45	6170.81	2768.14			1530.8	1861.29	1633.92
764	1046.97	1202.96	2387.42			1533.45	1863.93	1636.56
765	3064.25	3447.61	1898.3			1536.09	1863.93	1636.56
766	4153.53	3117.13	3273.12			1541.38	1866.58	1636.56
767	3735.8	2400.64	3302.2			1541.38	1866.58	1636.56
768	3532.22	4531.6	1863.93			1541.38	1869.22	1641.85
769	1284.92	3032.53	1832.21			1541.38	1874.51	1641.85
770	4016.05	1028.47	3817.76			1546.67	1874.51	1641.85
771	3088.05	3423.82	1528.16			1549.31	1877.15	1644.49
772	3566.59	10760.6	1520.23			1549.31	1877.15	1644.49
773	745.573	639.818	1697.37			1549.31	1877.15	1644.49
774	4558.04	3682.92	1308.72			1549.31	1879.8	1644.49
775	4944.05	5443.74	3320.71			1551.96	1879.8	1644.49
776	1425.05	2680.89	2403.28			1551.96	1882.44	1647.13
777	914.781	5337.99	2654.45			1551.96	1890.37	1647.13
778	4343.89	2596.29	3032.53			1554.6	1890.37	1647.13
779	2950.57	5412.01	880.411			1557.24	1898.3	1649.78
780	5129.12	1567.82	679.476			1557.24	1900.95	1652.42
781	2540.76	1774.04	1115.72			1557.24	1903.59	1652.42
782	3320.71	2358.34	3045.75			1557.24	1903.59	1652.42
783	2984.94	3627.4	2665.03			1557.24	1906.23	1657.71
784	2289.6	2175.91	2519.61			1557.24	1906.23	1657.71
785	3550.73	5805.95	4148.24			1559.89	1908.88	1660.35
786	1356.31	1570.46	2466.74			1559.89	1908.88	1660.35
787	3920.87	2852.74	2657.1			1559.89	1908.88	1660.35
788	3947.31	5874.69	2704.69			1562.53	1911.52	1660.35
789	3632.69	2694.11	2128.32			1565.17	1914.17	1660.35
790	2762.85	417.732	4084.79			1565.17	1919.45	1663
791	2376.84	3600.96	2004.06			1567.82	1919.45	1663
792	3923.51	2516.97	2493.18			1567.82	1919.45	1663
793	4243.42	3101.27	3072.18			1567.82	1924.74	1663
794	3072.18	494.405	1528.16			1570.46	1927.39	1665.64
795	4031.91	4708.74	4600.34			1570.46	1927.39	1665.64
796	2646.52	4312.16	2440.3			1570.46	1930.03	1665.64
797	1557.24	4914.97	2030.5			1570.46	1930.03	1665.64
798	3286.34	3587.74	1054.91			1573.11	1932.67	1665.64
799	959.727	8426.03	3378.87			1573.11	1935.32	1668.29
800	3706.71	330.484	975.59			1573.11	1935.32	1670.93
801	3175.3	571.077	1967.04			1573.11	1935.32	1670.93
802	2559.27	1673.57	3540.15			1573.11	1937.96	1670.93
803	2072.8	2813.08	2807.8			1573.11	1940.6	1670.93
804	3912.94	4595.06	2921.48			1575.75	1943.25	1673.57
805	3643.26	1551.96	3254.61			1578.39	1948.54	1676.22
806	901.562	2297.53	3233.46			1578.39	1948.54	1676.22
807	2297.53	12481.7	774.656			1578.39	1951.18	1676.22
808	2064.87	2797.22	3032.53			1578.39	1953.82	1678.86
809	1147.44	4888.53	2527.55			1581.04	1956.47	1678.86
810	1990.84	3603.6	1205.61			1581.04	1956.47	1678.86
811	2688.82	581.653	3796.61			1583.68	1961.76	1678.86
812	4388.83	909.493	1139.51			1583.68	1961.76	1681.51
813	1805.77	1388.03	3357.72			1583.68	1961.76	1681.51
814	4127.09	3862.7	1969.69			1586.33	1964.4	1681.51
815	864.547	4441.71	1813.7			1586.33	1967.04	1681.51
816	1205.61	2033.14	1758.18			1586.33	1967.04	1684.15
817	4558.04	1287.57	1789.9			1586.33	1972.33	1684.15
818	1856	1292.86	2170.62			1588.97	1974.98	1684.15
819	2561.92	1586.33	4100.65			1588.97	1977.62	1684.15
820	1107.78	2754.92	1567.82			1591.61	1980.26	1684.15
821	1686.79	2305.46	2265.8			1591.61	1980.26	1686.79
822	3606.25	2453.52	2014.63			1594.26	1988.19	1686.79
823	4298.94	1758.18	2368.91			1594.26	1988.19	1686.79
824	2035.78	2551.34	1908.88			1594.26	1988.19	1692.08
825	1610.12	2461.45	946.508			1596.9	1993.48	1692.08
826	3349.79	1303.43	2049			1596.9	1996.13	1694.72
827	2453.52	4695.52	3281.05			1599.54	2001.41	1694.72
828	2437.65	3088.05	1054.91			1599.54	2004.06	1694.72
829	4222.27	1509.65	4280.44			1602.19	2006.7	1694.72
830	2109.81	1440.91	4087.43			1602.19	2009.35	1697.37
831	4008.12	3553.37	1033.76			1604.83	2011.99	1697.37
832	3680.28	3693.49	3709.36			1607.48	2011.99	1697.37
833	5316.83	864.547	1163.31			1607.48	2011.99	1697.37
834	1250.55	1853.36	1594.26			1607.48	2011.99	1697.37
835	1181.81	1570.46	1549.31			1607.48	2014.63	1700.01
836	1115.72	1255.84	2625.37			1610.12	2019.92	1700.01
837	2881.82	1488.5	1372.17			1610.12	2019.92	1700.01
838	3897.07	3714.65	901.562			1610.12	2022.57	1702.66
839	4018.69	1216.18	2342.47			1610.12	2022.57	1702.66
840	1099.85	2252.58	1744.96			1612.76	2022.57	1705.3
841	1023.18	3032.53	2186.49			1615.41	2025.21	1705.3
842	1797.84	1232.05	2321.32			1615.41	2025.21	1705.3
843	2181.2	1493.79	2355.69			1615.41	2027.85	1705.3
844	2019.92	3767.52	4317.45			1620.7	2027.85	1710.59
845	2709.97	4034.55	1652.42			1620.7	2033.14	1710.59
846	4066.28	2128.32	4068.93			1620.7	2033.14	1710.59
847	4100.65	2234.08	2321.32			1623.34	2033.14	1710.59
848	3138.28	1102.5	2791.93			1623.34	2043.72	1710.59
849	1959.11	3973.75	3132.99			1623.34	2046.36	1710.59
850	4988.99	2509.04	1446.2			1623.34	2046.36	1710.59
851	1953.82	5226.94	2665.03			1623.34	2049	1713.23
852	2736.41	1076.06	2276.38			1623.34	2051.65	1713.23
853	2072.8	1181.81	3257.26			1623.34	2051.65	1715.88
854	795.807	3270.47	3196.45			1625.98	2054.29	1715.88
855	2429.72	3132.99	2741.7			1625.98	2054.29	1715.88
856	888.342	7286.52	3585.1			1625.98	2056.94	1715.88
857	4372.97	4375.61	1110.43			1625.98	2059.58	1715.88
858	3365.65	4819.79	1927.39			1628.63	2059.58	1718.52
859	2220.86	4721.96	4198.48			1628.63	2064.87	1718.52
860	2350.41	4674.37	1557.24			1628.63	2067.51	1718.52
861	3093.33	4388.83	1239.98			1628.63	2067.51	1718.52
862	3421.18	3976.39	2839.52			1631.27	2072.8	1718.52
863	2620.08	2667.67	1361.6			1633.92	2072.8	1718.52
864	3365.65	4420.56	1068.13			1633.92	2080.73	1721.16
865	1493.79	4296.3	1882.44			1636.56	2080.73	1721.16
866	3109.2	3254.61	2419.15			1636.56	2083.37	1721.16
867	3949.95	2797.22	2955.85			1636.56	2083.37	1723.81
868	1697.37	3474.05	2347.76			1636.56	2083.37	1729.09
869	2075.44	861.904	790.519			1639.2	2086.02	1729.09
870	2197.06	4494.59	3146.21			1639.2	2086.02	1729.09
871	4423.2	1993.48	2858.03			1639.2	2088.66	1731.74
872	2813.08	684.764	1924.74			1639.2	2091.31	1734.38
873	898.918	2688.82	2786.65			1639.2	2091.31	1737.03
874	3405.31	1731.74	1377.46			1641.85	2091.31	1737.03
875	4111.23	1221.47	1020.54			1641.85	2096.59	1739.67
876	3817.76	946.508	2323.97			1641.85	2096.59	1739.67
877	2160.05	5983.09	1406.54			1641.85	2099.24	1739.67
878	3579.81	2072.8	1041.69			1644.49	2101.88	1742.31
879	4005.47	1134.22	1348.38			1644.49	2112.46	1742.31
880	3553.37	3688.21	1290.21			1644.49	2117.74	1744.96
881	4507.81	3384.16	2567.2			1644.49	2117.74	1744.96
882	1374.82	327.841	3791.32			1644.49	2117.74	1744.96
883	1507.01	4076.86	1425.05			1644.49	2120.39	1747.6
884	3704.07	4624.14	1565.17			1647.13	2120.39	1747.6
885	4544.82	3693.49	1126.29			1652.42	2123.03	1750.25
886	4484.01	391.294	2799.86			1652.42	2123.03	1750.25
887	4476.08	1269.06	2498.46			1655.07	2123.03	1750.25
888	2083.37	4079.5	1028.47			1657.71	2123.03	1750.25
889	2374.2	2815.73	1462.06			1660.35	2123.03	1750.25
890	1062.84	3957.88	1856			1660.35	2125.68	1752.89
891	2966.43	3931.44	3296.91			1660.35	2128.32	1755.53
892	2138.9	3775.45	2979.65			1660.35	2128.32	1755.53
893	1015.25	1242.62	3037.81			1660.35	2130.96	1755.53
894	1425.05	3537.51	2583.07			1660.35	2133.61	1758.18
895	2083.37	343.704	2784			1663	2133.61	1758.18
896	1742.31	1432.98	2146.83			1663	2138.9	1758.18
897	3593.03	4071.57	2966.43			1665.64	2138.9	1758.18
898	2384.78	3717.29	1337.8			1665.64	2138.9	1760.82
899	4412.63	325.197	3455.55			1665.64	2141.54	1760.82
900	1514.94	4156.17	1485.86			1668.29	2144.18	1760.82
901	2030.5	1514.94	1477.93			1668.29	2144.18	1760.82
902	1583.68	861.904	2577.78			1673.57	2144.18	1760.82
903	3786.03	3828.33	2432.37			1673.57	2144.18	1763.47
904	3394.74	4169.39	2828.95			1676.22	2149.47	1766.11
905	3936.73	4243.42	3251.97			1676.22	2154.76	1768.75
906	3220.24	3947.31	1853.36			1676.22	2154.76	1768.75
907	2651.81	6276.56	1287.57			1678.86	2160.05	1768.75
908	2062.22	5290.4	1792.55			1678.86	2160.05	1771.4
909	4433.78	2138.9	2588.35			1681.51	2162.69	1771.4
910	3603.6	1128.94	1179.17			1681.51	2165.33	1771.4
911	1784.62	4891.17	2921.48			1681.51	2165.33	1771.4
912	3011.37	3556.01	2984.94			1681.51	2165.33	1771.4
913	1284.92	5229.59	2043.72			1681.51	2170.62	1774.04
914	1411.83	4285.72	3883.85			1684.15	2170.62	1774.04
915	3312.78	3981.68	3984.32			1684.15	2175.91	1776.68
916	1779.33	4531.6	2635.94			1686.79	2178.55	1779.33
917	2686.18	1578.39	1456.78			1686.79	2181.2	1779.33
918	1456.78	2622.72	2265.8			1686.79	2183.84	1781.97
919	4174.68	5213.72	3111.84			1692.08	2186.49	1781.97
920	1829.56	3923.51	2149.47			1694.72	2191.77	1781.97
921	3072.18	1705.3	3368.3			1694.72	2199.7	1787.26
922	1377.46	1517.58	2913.55			1697.37	2199.7	1787.26
923	1959.11	2271.09	4060.99			1697.37	2204.99	1787.26
924	3532.22	438.883	2228.79			1697.37	2210.28	1787.26
925	1557.24	7342.04	2405.93			1697.37	2210.28	1789.9
926	3751.66	2490.53	1998.77			1700.01	2212.92	1789.9
927	1615.41	5361.78	1641.85			1700.01	2212.92	1789.9
928	2440.3	766.724	716.49			1700.01	2212.92	1792.55
929	2871.25	388.65	703.271			1702.66	2212.92	1792.55
930	703.271	3706.71	2686.18			1705.3	2215.57	1792.55
931	1935.32	3344.5	1287.57			1705.3	2218.21	1795.19
932	2614.79	2329.25	1821.63			1705.3	2218.21	1795.19
933	2339.83	4515.74	1789.9			1707.94	2220.86	1797.84
934	3994.9	1877.15	3844.2			1707.94	2220.86	1797.84
935	2699.4	1731.74	1351.02			1707.94	2220.86	1797.84
936	750.861	853.972	4301.59			1707.94	2223.5	1797.84
937	2046.36	4899.1	1163.31			1710.59	2226.14	1797.84
938	1205.61	949.151	3053.68			1710.59	2226.14	1803.12
939	2427.08	362.211	1874.51			1710.59	2234.08	1803.12
940	779.943	2149.47	2731.12			1710.59	2234.08	1803.12
941	1760.82	2072.8	4790.7			1713.23	2234.08	1803.12
942	4058.35	2099.24	1750.25			1713.23	2236.72	1803.12
943	1665.64	2799.86	3106.55			1715.88	2236.72	1803.12
944	4053.06	4267.22	912.137			1715.88	2239.36	1805.77
945	3333.93	3344.5	3902.36			1718.52	2242.01	1805.77
946	1853.36	2374.2	1372.17			1718.52	2244.65	1808.41
947	2263.16	375.43	2234.08			1718.52	2247.29	1811.06
948	2260.51	3786.03	1091.92			1718.52	2249.94	1811.06
949	5496.62	2916.2	2921.48			1721.16	2252.58	1813.7
950	912.137	3204.38	2966.43			1721.16	2252.58	1813.7
951	1853.36	1816.34	896.274			1723.81	2252.58	1813.7
952	1115.72	3151.5	2001.41			1723.81	2257.87	1813.7
953	1121	5438.45	3355.08			1726.45	2257.87	1816.34
954	4994.28	1213.54	1017.89			1726.45	2257.87	1816.34
955	2654.45	1670.93	2210.28			1729.09	2257.87	1818.99
956	1276.99	1070.77	2826.3			1731.74	2263.16	1818.99
957	1718.52	1858.64	2932.06			1731.74	2271.09	1821.63
958	1951.18	3751.66	3637.97			1734.38	2271.09	1821.63
959	1818.99	1781.97	933.288			1734.38	2271.09	1824.27
960	1105.14	1440.91	2273.73			1734.38	2273.73	1824.27
961	3976.39	1382.75	928			1737.03	2281.66	1824.27
962	2051.65	3775.45	2519.61			1737.03	2281.66	1824.27
963	4367.68	3489.92	949.151			1737.03	2281.66	1826.92
964	1853.36	4166.75	3841.55			1737.03	2286.95	1826.92
965	1467.35	4137.67	3793.96			1737.03	2297.53	1826.92
966	3622.11	1967.04	943.864			1737.03	2300.17	1826.92
967	4761.62	737.641	2649.16			1739.67	2300.17	1826.92
968	2305.46	856.616	1292.86			1739.67	2300.17	1832.21
969	951.795	1869.22	1202.96			1742.31	2302.82	1832.21
970	1292.86	2879.18	2495.82			1742.31	2305.46	1832.21
971	1052.26	4959.91	2043.72			1744.96	2318.68	1832.21
972	4023.98	3088.05	1060.19			1744.96	2321.32	1834.85
973	1737.03	3114.49	1684.15			1744.96	2323.97	1834.85
974	3495.2	4988.99	1107.78			1744.96	2326.61	1834.85
975	1345.73	2096.59	943.864			1744.96	2329.25	1837.49
976	3336.57	1842.78	1731.74			1747.6	2331.9	1837.49
977	1366.88	1335.16	1382.75			1750.25	2331.9	1840.14
978	1499.08	1195.03	1760.82			1752.89	2331.9	1840.14
979	2353.05	1972.33	3294.27			1752.89	2334.54	1840.14
980	3217.6	1898.3	2223.5			1752.89	2334.54	1842.78
981	1573.11	2855.39	4219.63			1755.53	2337.19	1842.78
982	3333.93	1694.72	2553.98			1758.18	2337.19	1845.43
983	666.257	3019.31	1715.88			1760.82	2339.83	1845.43
984	3373.59	2799.86	2194.42			1760.82	2339.83	1845.43
985	1737.03	3476.7	1951.18			1760.82	2342.47	1848.07
986	2971.72	1004.67	2115.1			1760.82	2342.47	1850.71
987	2400.64	1850.71	2688.82			1760.82	2345.12	1850.71
988	2086.02	5396.15	933.288			1763.47	2345.12	1850.71
989	1686.79	5475.47	729.71			1763.47	2345.12	1853.36
990	1575.75	1750.25	3328.64			1763.47	2347.76	1853.36
991	4050.42	4383.55	1663			1766.11	2347.76	1853.36
992	2009.35	4407.34	3019.31			1766.11	2350.41	1853.36
993	4409.99	2921.48	2530.19			1766.11	2350.41	1853.36
994	2183.84	5673.76	2612.15			1768.75	2350.41	1853.36
995	772.012	1123.65	996.741			1768.75	2353.05	1856
996	2345.12	3275.76	1329.87			1768.75	2355.69	1856
997	1594.26	444.171	2839.52			1768.75	2355.69	1856
998	4227.56	4803.92	1988.19			1771.4	2355.69	1856
999	930.644	4959.91	1485.86			1771.4	2355.69	1858.64
1000	2659.74	4843.58	2966.43			1771.4	2358.34	1861.29
1001	1126.29	3455.55	1763.47			1771.4	2358.34	1861.29
1002	4277.79	6847.64	4016.05			1774.04	2358.34	1863.93
1003	954.439	3984.32	1464.71			1774.04	2360.98	1863.93
1004	4227.56	5073.6	1549.31			1776.68	2363.63	1863.93
1005	3653.84	343.704	1017.89			1776.68	2366.27	1863.93
1006	1139.51	3439.68	3860.06			1776.68	2366.27	1866.58
1007	4179.97	605.448	1710.59			1779.33	2368.91	1869.22
1008	2220.86	4558.04	2725.84			1779.33	2371.56	1869.22
1009	1483.21	4121.8	3442.33			1781.97	2371.56	1871.86
1010	2776.07	5615.59	1919.45			1781.97	2371.56	1871.86
1011	1184.46	3199.09	3815.11			1781.97	2374.2	1871.86
1012	1633.92	1298.14	4222.27			1784.62	2376.84	1874.51
1013	2553.98	3587.74	1477.93			1784.62	2376.84	1877.15
1014	906.849	1237.33	1705.3			1787.26	2376.84	1877.15
1015	1107.78	4690.24	1229.4			1792.55	2382.13	1879.8
1016	1107.78	3817.76	1295.5			1792.55	2382.13	1879.8
1017	3444.97	3458.19	2218.21			1792.55	2387.42	1882.44
1018	4232.85	2472.02	1221.47			1792.55	2387.42	1882.44
1019	2427.08	2887.11	893.63			1795.19	2390.06	1882.44
1020	4597.7	3193.8	1993.48			1795.19	2392.71	1885.08
1021	1115.72	1448.84	3045.75			1795.19	2395.35	1887.73
1022	1229.4	1811.06	1303.43			1797.84	2395.35	1890.37
1023	5263.96	1670.93	949.151			1797.84	2398	1890.37
1024	991.453	1967.04	1076.06			1797.84	2400.64	1890.37
1025	1607.48	2355.69	1581.04			1797.84	2400.64	1890.37
1026	3931.44	1739.67	2865.96			1803.12	2400.64	1893.02
1027	1366.88	4230.2	2591			1803.12	2403.28	1893.02
1028	1062.84	2334.54	3910.29			1803.12	2403.28	1893.02
1029	5007.5	1179.17	2099.24			1803.12	2403.28	1893.02
1030	1850.71	1446.2	824.889			1805.77	2413.86	1895.66
1031	2279.02	3339.22	1118.36			1805.77	2413.86	1895.66
1032	3027.24	1705.3	2789.29			1805.77	2419.15	1898.3
1033	697.983	1020.54	2154.76			1811.06	2421.79	1898.3
1034	2302.82	322.553	3185.87			1811.06	2424.43	1898.3
1035	1641.85	5216.37	1136.87			1811.06	2429.72	1898.3
1036	2392.71	370.143	2683.53			1811.06	2429.72	1898.3
1037	4224.91	4674.37	1832.21			1813.7	2429.72	1898.3
1038	1491.15	1758.18	1660.35			1813.7	2432.37	1900.95
1039	5113.26	6144.37	3595.67			1816.34	2437.65	1903.59
1040	2194.42	3489.92	2165.33			1816.34	2437.65	1903.59
1041	2279.02	4060.99	1710.59			1818.99	2440.3	1903.59
1042	2770.78	4135.02	3093.33			1818.99	2440.3	1906.23
1043	2051.65	4108.58	3064.25			1818.99	2453.52	1908.88
1044	946.508	5972.52	3170.01			1821.63	2456.16	1908.88
1045	1049.62	8259.47	2628.01			1824.27	2458.8	1908.88
1046	2617.44	4409.99	1054.91			1824.27	2458.8	1911.52
1047	4521.03	3318.06	1567.82			1826.92	2461.45	1911.52
1048	2569.85	5372.36	1189.74			1829.56	2464.09	1911.52
1049	1781.97	1940.6	1953.82			1829.56	2464.09	1914.17
1050	2242.01	1697.37	1306.07			1832.21	2464.09	1916.81
1051	925.357	1655.07	1205.61			1832.21	2472.02	1916.81
1052	1919.45	2337.19	1475.28			1832.21	2472.02	1916.81
1053	4396.77	2456.16	1163.31			1834.85	2472.02	1919.45
1054	3122.42	2345.12	1102.5			1837.49	2474.67	1919.45
1055	1824.27	1631.27	1657.71			1837.49	2474.67	1919.45
1056	2670.31	782.587	925.357			1837.49	2477.31	1922.1
1057	980.878	3014.02	2194.42			1837.49	2479.96	1922.1
1058	3593.03	1559.89	1977.62			1840.14	2482.6	1922.1
1059	811.67	1377.46	1105.14			1840.14	2485.24	1922.1
1060	1202.96	1250.55	904.206			1842.78	2487.89	1922.1
1061	1504.37	6025.39	2210.28			1842.78	2490.53	1924.74
1062	1290.21	4079.5	1562.53			1842.78	2490.53	1924.74
1063	3008.73	5771.58	806.382			1845.43	2490.53	1927.39
1064	3035.17	491.761	1893.02			1845.43	2493.18	1927.39
1065	2363.63	1784.62	3653.84			1845.43	2498.46	1930.03
1066	2477.31	4568.62	2432.37			1845.43	2501.11	1932.67
1067	2212.92	2733.77	3156.79			1845.43	2503.75	1932.67
1068	1684.15	1707.94	1052.26			1845.43	2506.39	1932.67
1069	3209.67	4650.58	1337.8			1845.43	2506.39	1935.32
1070	2244.65	1586.33	2323.97			1848.07	2506.39	1935.32
1071	2450.87	2548.7	2479.96			1850.71	2509.04	1935.32
1072	4246.06	2220.86	1253.2			1850.71	2509.04	1940.6
1073	4634.71	367.499	2538.12			1850.71	2509.04	1945.89
1074	1908.88	2199.7	3294.27			1850.71	2514.33	1945.89
1075	2144.18	2170.62	3347.15			1850.71	2514.33	1948.54
1076	2136.25	2355.69	943.864			1853.36	2514.33	1948.54
1077	1509.65	1221.47	2197.06			1853.36	2516.97	1951.18
1078	1261.13	2123.03	2160.05			1853.36	2516.97	1953.82
1079	2043.72	2339.83	2398			1853.36	2519.61	1953.82
1080	4838.29	3011.37	1321.94			1856	2519.61	1953.82
1081	2746.99	3132.99	1451.49			1856	2522.26	1953.82
1082	2754.92	3392.09	2067.51			1856	2532.83	1953.82
1083	3286.34	1462.06	3786.03			1856	2535.48	1956.47
1084	2379.49	481.185	2051.65			1856	2538.12	1956.47
1085	3600.96	7564.13	3415.89			1856	2540.76	1959.11
1086	2183.84	4536.89	3344.5			1856	2546.05	1959.11
1087	3833.62	1004.67	1406.54			1858.64	2548.7	1964.4
1088	4922.9	3270.47	1641.85			1861.29	2551.34	1967.04
1089	3008.73	4930.83	1718.52			1863.93	2551.34	1967.04
1090	877.767	1927.39	848.684			1863.93	2551.34	1969.69
1091	3106.55	626.599	1670.93			1863.93	2553.98	1969.69
1092	1340.45	4293.65	1165.95			1863.93	2553.98	1969.69
1093	2458.8	2027.85	3146.21			1866.58	2556.63	1972.33
1094	1641.85	1062.84	2051.65			1869.22	2556.63	1972.33
1095	1734.38	1390.68	2353.05			1871.86	2556.63	1972.33
1096	1885.08	4317.45	3093.33			1871.86	2561.92	1972.33
1097	740.285	2887.11	2138.9			1874.51	2564.56	1974.98
1098	5287.75	2398	4618.85			1874.51	2575.14	1974.98
1099	1456.78	3355.08	1964.4			1874.51	2577.78	1977.62
1100	2670.31	1779.33	4232.85			1877.15	2580.42	1977.62
1101	2482.6	1398.61	4542.18			1877.15	2580.42	1977.62
1102	1525.52	4372.97	1797.84			1882.44	2585.71	1980.26
1103	1208.25	4883.24	2051.65			1882.44	2588.35	1980.26
1104	3244.04	1906.23	1306.07			1882.44	2588.35	1982.91
1105	1932.67	2762.85	1586.33			1882.44	2596.29	1982.91
1106	3926.16	346.348	3693.49			1882.44	2598.93	1982.91
1107	949.151	6517.15	1097.21			1885.08	2614.79	1985.55
1108	846.04	4002.83	1998.77			1887.73	2617.44	1985.55
1109	2516.97	3989.61	1797.84			1887.73	2620.08	1985.55
1110	853.972	1139.51	2649.16			1890.37	2622.72	1985.55
1111	1700.01	4457.57	2212.92			1890.37	2625.37	1985.55
1112	877.767	1649.78	2873.89			1893.02	2630.66	1988.19
1113	4653.22	2564.56	711.203			1898.3	2633.3	1990.84
1114	2585.71	5998.95	1380.1			1898.3	2646.52	1990.84
1115	1229.4	3936.73	2419.15			1900.95	2651.81	1990.84
1116	5163.49	2709.97	925.357			1903.59	2654.45	1993.48
1117	1850.71	3566.59	1871.86			1903.59	2659.74	1993.48
1118	4341.24	4536.89	2567.2			1903.59	2662.38	1998.77
1119	1633.92	5977.8	2969.07			1903.59	2665.03	1998.77
1120	3659.12	5763.65	2939.99			1903.59	2667.67	1998.77
1121	6049.19	2659.74	3304.84			1906.23	2670.31	1998.77
1122	4172.04	1168.59	2173.27			1906.23	2672.96	1998.77
1123	4748.4	3048.39	1274.35			1908.88	2678.25	1998.77
1124	4698.17	1684.15	3957.88			1908.88	2678.25	1998.77
1125	3217.6	4782.77	1295.5			1908.88	2680.89	2001.41
1126	4764.26	6043.9	1192.39			1908.88	2680.89	2004.06
1127	3074.83	4862.09	1229.4			1908.88	2683.53	2004.06
1128	2342.47	3955.24	737.641			1911.52	2686.18	2004.06
1129	1496.43	1218.83	684.764			1911.52	2688.82	2004.06
1130	1128.94	3571.88	3579.81			1911.52	2691.47	2004.06
1131	1025.82	4087.43	4370.33			1914.17	2691.47	2006.7
1132	2881.82	3172.65	1856			1914.17	2694.11	2006.7
1133	2046.36	5361.78	2366.27			1914.17	2696.75	2006.7
1134	4513.1	4380.9	3101.27			1914.17	2696.75	2009.35
1135	1914.17	4809.21	1232.05			1914.17	2699.4	2009.35
1136	1247.91	2553.98	1187.1			1916.81	2702.04	2009.35
1137	2493.18	1298.14	2961.14			1916.81	2702.04	2009.35
1138	2688.82	864.547	1197.68			1919.45	2704.69	2011.99
1139	4351.82	2509.04	2197.06			1919.45	2707.33	2011.99
1140	3823.04	2117.74	4330.67			1919.45	2709.97	2011.99
1141	3444.97	2033.14	3088.05			1919.45	2712.62	2011.99
1142	2416.5	1234.69	3833.62			1919.45	2715.26	2014.63
1143	1813.7	2051.65	3918.22			1919.45	2715.26	2014.63
1144	1395.97	2368.91	4788.06			1919.45	2717.9	2014.63
1145	2189.13	4018.69	2530.19			1922.1	2720.55	2017.28
1146	692.696	4124.45	1107.78			1927.39	2725.84	2017.28
1147	3392.09	1636.56	2093.95			1927.39	2733.77	2017.28
1148	1102.5	4380.9	1142.15			1927.39	2733.77	2019.92
1149	1528.16	2064.87	2781.36			1932.67	2744.34	2022.57
1150	4232.85	1554.6	3201.73			1935.32	2744.34	2022.57
1151	3992.25	1840.14	2223.5			1935.32	2746.99	2022.57
1152	4153.53	697.983	1475.28			1940.6	2746.99	2022.57
1153	1224.11	1908.88	809.026			1940.6	2749.63	2025.21
1154	1784.62	3688.21	1729.09			1940.6	2754.92	2027.85
1155	3238.75	1512.3	2760.21			1943.25	2754.92	2027.85
1156	2014.63	2413.86	1596.9			1943.25	2757.56	2027.85
1157	1046.97	4431.14	2006.7			1943.25	2757.56	2030.5
1158	1435.62	3830.98	1081.35			1945.89	2757.56	2030.5
1159	2842.17	1668.29	2892.4			1945.89	2762.85	2030.5
1160	1483.21	904.206	3429.11			1945.89	2762.85	2030.5
1161	1099.85	4788.06	2300.17			1945.89	2765.49	2030.5
1162	4431.14	2646.52	1953.82			1948.54	2770.78	2033.14
1163	668.901	2331.9	1158.02			1948.54	2773.43	2033.14
1164	1900.95	4100.65	1247.91			1951.18	2776.07	2035.78
1165	1681.51	4082.14	2268.45			1951.18	2778.71	2035.78
1166	2947.92	7178.12	1755.53			1953.82	2778.71	2035.78
1167	1184.46	1789.9	1686.79			1953.82	2784	2035.78
1168	4240.78	2218.21	4076.86			1953.82	2784	2043.72
1169	2445.59	1829.56	2173.27			1956.47	2789.29	2043.72
1170	2107.17	1607.48	1504.37			1956.47	2789.29	2043.72
1171	2194.42	965.015	4179.97			1956.47	2789.29	2043.72
1172	4082.14	2871.25	1750.25			1959.11	2789.29	2046.36
1173	734.998	3706.71	1583.68			1959.11	2794.58	2046.36
1174	1554.6	5102.68	1985.55			1959.11	2797.22	2049
1175	1308.72	7151.68	2363.63			1959.11	2797.22	2049
1176	1483.21	1607.48	1353.66			1961.76	2797.22	2051.65
1177	1546.67	2004.06	2559.27			1961.76	2799.86	2051.65
1178	3981.68	4460.22	4002.83			1961.76	2799.86	2051.65
1179	1372.17	473.254	1990.84			1964.4	2799.86	2051.65
1180	2316.04	1232.05	1700.01			1964.4	2807.8	2051.65
1181	1004.67	4981.06	2133.61			1964.4	2813.08	2054.29
1182	1903.59	2501.11	3820.4			1967.04	2815.73	2056.94
1183	4423.2	330.484	819.602			1967.04	2815.73	2056.94
1184	2966.43	782.587	4068.93			1967.04	2815.73	2056.94
1185	1276.99	2580.42	3653.84			1967.04	2815.73	2059.58
1186	4306.87	1964.4	1083.99			1969.69	2823.66	2059.58
1187	4201.12	3653.84	1390.68			1969.69	2826.3	2059.58
1188	4235.49	3199.09	1308.72			1972.33	2826.3	2059.58
1189	1536.09	6435.19	1097.21			1974.98	2828.95	2062.22
1190	1078.7	1903.59	2154.76			1980.26	2828.95	2062.22
1191	3259.9	2339.83	930.644			1980.26	2831.59	2062.22
1192	1710.59	898.918	1514.94			1980.26	2831.59	2064.87
1193	1036.4	586.94	750.861			1982.91	2836.88	2064.87
1194	2865.96	3421.18	1377.46			1982.91	2836.88	2064.87
1195	2598.93	3177.94	708.559			1985.55	2836.88	2064.87
1196	4584.48	3056.32	2400.64			1985.55	2839.52	2064.87
1197	1972.33	756.149	3746.37			1985.55	2839.52	2064.87
1198	972.946	790.519	2339.83			1985.55	2842.17	2067.51
1199	1496.43	2170.62	3035.17			1988.19	2842.17	2067.51
1200	2271.09	4851.51	867.191			1988.19	2844.81	2067.51
1201	1070.77	552.57	1665.64			1988.19	2844.81	2070.15
1202	5726.64	6969.26	2284.31			1990.84	2844.81	2070.15
1203	1660.35	790.519	1795.19			1990.84	2852.74	2072.8
1204	2294.88	3749.02	1358.95			1990.84	2852.74	2075.44
1205	967.659	399.225	3484.63			1990.84	2852.74	2078.09
1206	1874.51	772.012	3320.71			1993.48	2855.39	2080.73
1207	1858.64	4016.05	3056.32			1993.48	2858.03	2080.73
1208	2138.9	3415.89	1818.99			1996.13	2860.67	2080.73
1209	1189.74	5673.76	2411.21			1996.13	2860.67	2080.73
1210	3704.07	1914.17	2947.92			1998.77	2865.96	2080.73
1211	1459.42	1826.92	1321.94			1998.77	2865.96	2083.37
1212	2400.64	4304.23	1168.59			2001.41	2871.25	2083.37
1213	2990.22	3413.24	716.49			2001.41	2876.54	2086.02
1214	1964.4	2226.14	2413.86			2004.06	2876.54	2086.02
1215	3870.63	3857.42	2966.43			2004.06	2876.54	2086.02
1216	1559.89	4190.54	3891.79			2004.06	2879.18	2088.66
1217	2331.9	4441.71	1195.03			2006.7	2879.18	2088.66
1218	2670.31	4782.77	2598.93			2006.7	2881.82	2088.66
1219	2646.52	343.704	3278.41			2006.7	2881.82	2088.66
1220	1832.21	917.425	4021.34			2009.35	2881.82	2088.66
1221	4100.65	2889.76	2046.36			2009.35	2884.47	2088.66
1222	1945.89	3637.97	2781.36			2009.35	2884.47	2091.31
1223	2175.91	5036.58	4113.87			2009.35	2887.11	2091.31
1224	1967.04	6654.64	2107.17			2009.35	2887.11	2093.95
1225	1914.17	5253.38	1610.12			2011.99	2889.76	2096.59
1226	3466.12	2350.41	1340.45			2014.63	2892.4	2099.24
1227	2448.23	393.938	1480.57			2014.63	2895.04	2099.24
1228	1419.76	3220.24	1073.41			2017.28	2900.33	2099.24
1229	1628.63	1023.18	3185.87			2017.28	2900.33	2099.24
1230	2575.14	6017.46	1271.7			2019.92	2905.62	2104.53
1231	2363.63	4349.18	1443.56			2019.92	2908.26	2107.17
1232	2672.96	401.869	912.137			2022.57	2910.91	2107.17
1233	3056.32	2482.6	2506.39			2022.57	2913.55	2107.17
1234	1557.24	3222.88	2022.57			2022.57	2916.2	2107.17
1235	3984.32	957.083	2249.94			2025.21	2916.2	2107.17
1236	1427.69	2992.87	3558.66			2025.21	2916.2	2109.81
1237	1210.9	2059.58	1057.55			2025.21	2918.84	2112.46
1238	1967.04	1879.8	2580.42			2027.85	2921.48	2112.46
1239	2421.79	1673.57	637.174			2027.85	2924.13	2112.46
1240	4547.47	4951.98	1710.59			2027.85	2926.77	2112.46
1241	5327.41	734.998	4063.64			2030.5	2932.06	2115.1
1242	3122.42	5237.52	1290.21			2030.5	2934.7	2117.74
1243	827.533	2286.95	1329.87			2030.5	2937.35	2120.39
1244	1927.39	1160.66	3849.48			2030.5	2937.35	2120.39
1245	1641.85	959.727	1816.34			2033.14	2937.35	2123.03
1246	3627.4	1472.64	991.453			2033.14	2942.63	2123.03
1247	4060.99	359.567	1438.27			2033.14	2942.63	2123.03
1248	1078.7	1726.45	1554.6			2033.14	2942.63	2125.68
1249	962.371	1829.56	1374.82			2035.78	2945.28	2125.68
1250	3458.19	1581.04	3423.82			2035.78	2950.57	2128.32
1251	4542.18	539.351	3994.9			2038.43	2955.85	2128.32
1252	2501.11	528.775	1750.25			2038.43	2955.85	2128.32
1253	3302.2	2223.5	2183.84			2041.07	2955.85	2130.96
1254	4510.45	1562.53	2577.78			2043.72	2955.85	2133.61
1255	653.037	3976.39	2479.96			2043.72	2966.43	2133.61
1256	2651.81	4076.86	2815.73			2046.36	2969.07	2133.61
1257	4232.85	4335.96	2593.64			2046.36	2977	2136.25
1258	3045.75	4433.78	1155.37			2046.36	2979.65	2136.25
1259	2524.9	4677.02	3101.27			2049	2982.29	2136.25
1260	1189.74	4708.74	1840.14			2049	2984.94	2136.25
1261	6490.72	3807.18	1187.1			2051.65	2984.94	2138.9
1262	4365.04	4029.27	1195.03			2051.65	2987.58	2138.9
1263	674.188	2770.78	3415.89			2051.65	2987.58	2138.9
1264	1176.52	2120.39	3270.47			2051.65	2990.22	2141.54
1265	1771.4	3365.65	980.878			2051.65	2992.87	2141.54
1266	4008.12	343.704	1485.86			2054.29	2992.87	2144.18
1267	2247.29	3534.86	2659.74			2054.29	2995.51	2144.18
1268	2112.46	2051.65	978.234			2054.29	2998.16	2144.18
1269	742.929	2022.57	888.342			2054.29	2998.16	2144.18
1270	2363.63	380.718	1197.68			2056.94	3000.8	2144.18
1271	885.698	319.909	4103.3			2059.58	3008.73	2146.83
1272	3360.37	3373.59	824.889			2059.58	3011.37	2146.83
1273	1395.97	1980.26	1959.11			2062.22	3014.02	2146.83
1274	901.562	1091.92	2778.71			2062.22	3016.66	2149.47
1275	1623.34	2123.03	3167.36			2062.22	3019.31	2149.47
1276	851.328	1596.9	1625.98			2062.22	3029.88	2149.47
1277	880.411	1974.98	1303.43			2064.87	3032.53	2154.76
1278	1678.86	613.379	2405.93			2067.51	3032.53	2154.76
1279	4148.24	1734.38	2112.46			2067.51	3032.53	2154.76
1280	3381.52	4666.44	2858.03			2070.15	3035.17	2154.76
1281	4880.6	1028.47	1774.04			2070.15	3035.17	2154.76
1282	3852.13	1882.44	4536.89			2070.15	3040.46	2154.76
1283	2514.33	3960.53	999.385			2072.8	3043.1	2157.4
1284	869.835	3706.71	2252.58			2072.8	3045.75	2160.05
1285	935.932	3270.47	3357.72			2075.44	3045.75	2160.05
1286	1501.72	3762.24	4166.75			2075.44	3045.75	2162.69
1287	959.727	1417.12	4164.1			2075.44	3048.39	2162.69
1288	1996.13	634.53	1522.87			2078.09	3051.03	2165.33
1289	4312.16	4687.59	1163.31			2078.09	3053.68	2170.62
1290	906.849	367.499	1916.81			2080.73	3056.32	2170.62
1291	4317.45	5308.9	3957.88			2083.37	3056.32	2173.27
1292	2498.46	2091.31	827.533			2083.37	3056.32	2173.27
1293	1189.74	5784.8	3867.99			2083.37	3061.61	2178.55
1294	774.656	6728.66	1150.09			2083.37	3077.47	2178.55
1295	1549.31	3915.58	1298.14			2083.37	3077.47	2181.2
1296	1036.4	6065.05	1039.04			2083.37	3080.12	2181.2
1297	1282.28	2842.17	1128.94			2086.02	3082.76	2181.2
1298	2852.74	2321.32	1982.91			2086.02	3082.76	2181.2
1299	1329.87	2865.96	1345.73			2086.02	3082.76	2183.84
1300	1551.96	3537.51	2752.27			2088.66	3085.4	2183.84
1301	814.314	3278.41	1099.85			2088.66	3088.05	2183.84
1302	3460.83	3238.75	774.656			2091.31	3088.05	2183.84
1303	2509.04	515.556	2403.28			2091.31	3088.05	2183.84
1304	1274.35	494.405	1237.33			2091.31	3088.05	2186.49
1305	3008.73	552.57	2905.62			2091.31	3098.62	2186.49
1306	2191.77	3722.58	2358.34			2093.95	3101.27	2186.49
1307	2051.65	1470	758.792			2096.59	3103.91	2191.77
1308	4769.55	4597.7	1620.7			2096.59	3106.55	2191.77
1309	2490.53	7640.8	1115.72			2099.24	3106.55	2194.42
1310	1306.07	1528.16	3489.92			2099.24	3109.2	2194.42
1311	4528.96	4195.83	676.832			2101.88	3114.49	2194.42
1312	2450.87	5745.14	3212.31			2101.88	3117.13	2194.42
1313	2588.35	3936.73	3127.71			2104.53	3119.77	2197.06
1314	1866.58	428.308	1795.19			2107.17	3127.71	2197.06
1315	1255.84	2091.31	1890.37			2107.17	3127.71	2197.06
1316	5100.04	5211.08	1935.32			2107.17	3130.35	2197.06
1317	1054.91	4518.38	949.151			2107.17	3132.99	2199.7
1318	1054.91	2345.12	2876.54			2107.17	3132.99	2202.35
1319	4071.57	4219.63	772.012			2107.17	3132.99	2202.35
1320	2316.04	4132.38	1990.84			2109.81	3132.99	2204.99
1321	2527.55	3159.43	1430.34			2109.81	3135.64	2207.64
1322	2323.97	2990.22	2009.35			2112.46	3138.28	2210.28
1323	766.724	4111.23	2326.61			2112.46	3138.28	2210.28
1324	3812.47	912.137	1832.21			2112.46	3138.28	2210.28
1325	1890.37	3452.9	1427.69			2112.46	3148.86	2212.92
1326	1514.94	1906.23	3912.94			2112.46	3151.5	2212.92
1327	880.411	388.65	1792.55			2115.1	3151.5	2218.21
1328	1795.19	877.767	1002.03			2115.1	3151.5	2218.21
1329	3217.6	1491.15	2104.53			2115.1	3159.43	2218.21
1330	967.659	3135.64	898.918			2115.1	3159.43	2218.21
1331	2038.43	896.274	2855.39			2115.1	3159.43	2218.21
1332	4140.31	5626.17	1908.88			2117.74	3170.01	2218.21
1333	4449.64	2509.04	2067.51			2117.74	3172.65	2220.86
1334	2249.94	1517.58	3267.83			2117.74	3172.65	2223.5
1335	3405.31	1229.4	3669.7			2120.39	3177.94	2223.5
1336	2432.37	1919.45	753.505			2120.39	3177.94	2223.5
1337	909.493	2900.33	1541.38			2123.03	3180.58	2223.5
1338	1594.26	3532.22	2342.47			2125.68	3180.58	2223.5
1339	1908.88	6456.35	901.562			2128.32	3180.58	2226.14
1340	3444.97	4156.17	1663			2128.32	3183.23	2226.14
1341	1718.52	621.311	2144.18			2136.25	3188.51	2226.14
1342	2128.32	7030.07	2546.05			2136.25	3193.8	2226.14
1343	2635.94	2826.3	3685.56			2136.25	3196.45	2226.14
1344	1943.25	2400.64	2416.5			2136.25	3199.09	2228.79
1345	1919.45	581.653	3265.19			2138.9	3199.09	2228.79
1346	2892.4	5557.43	1779.33			2138.9	3199.09	2228.79
1347	4515.74	3878.57	1102.5			2138.9	3201.73	2228.79
1348	674.188	5007.5	2408.57			2138.9	3204.38	2231.43
1349	1419.76	4558.04	1046.97			2141.54	3207.02	2231.43
1350	2257.87	3600.96	4354.46			2144.18	3209.67	2234.08
1351	2411.21	441.527	2688.82			2144.18	3209.67	2234.08
1352	4922.9	2371.56	1856			2144.18	3212.31	2234.08
1353	1927.39	5425.23	1015.25			2144.18	3214.95	2236.72
1354	2234.08	4983.71	922.713			2146.83	3214.95	2236.72
1355	996.741	2088.66	732.354			2146.83	3217.6	2236.72
1356	4179.97	6458.99	1652.42			2146.83	3220.24	2236.72
1357	3135.64	5961.94	3664.41			2149.47	3222.88	2236.72
1358	3556.01	1935.32	676.832			2149.47	3222.88	2236.72
1359	2469.38	1562.53	2255.23			2152.12	3225.53	2236.72
1360	4251.35	3865.35	1557.24			2154.76	3225.53	2239.36
1361	3471.41	629.242	2004.06			2154.76	3228.17	2239.36
1362	1877.15	1448.84	2064.87			2154.76	3228.17	2242.01
1363	1372.17	4716.67	3645.91			2154.76	3228.17	2247.29
1364	2680.89	3043.1	1908.88			2154.76	3233.46	2247.29
1365	2950.57	4573.91	3249.32			2157.4	3236.1	2247.29
1366	729.71	2479.96	1266.42			2160.05	3236.1	2247.29
1367	1959.11	1816.34	2400.64			2160.05	3238.75	2247.29
1368	2263.16	4269.86	3532.22			2162.69	3241.39	2247.29
1369	1985.55	1729.09	1898.3			2162.69	3246.68	2247.29
1370	3653.84	1345.73	1139.51			2162.69	3249.32	2249.94
1371	1504.37	1636.56	1009.96			2162.69	3251.97	2249.94
1372	4328.03	586.94	1438.27			2165.33	3251.97	2249.94
1373	2450.87	2236.72	1348.38			2167.98	3254.61	2252.58
1374	3228.17	2382.13	690.052			2167.98	3270.47	2252.58
1375	734.998	2366.27	3833.62			2167.98	3270.47	2255.23
1376	1358.95	383.362	914.781			2170.62	3270.47	2255.23
1377	3883.85	409.801	1945.89			2170.62	3273.12	2255.23
1378	3881.21	346.348	1390.68			2170.62	3275.76	2255.23
1379	1496.43	2345.12	2017.28			2173.27	3278.41	2260.51
1380	1144.8	322.553	2218.21			2175.91	3283.69	2263.16
1381	2522.26	417.732	5118.54			2175.91	3286.34	2263.16
1382	2398	3944.66	2665.03			2175.91	3286.34	2265.8
1383	671.545	3159.43	3191.16			2178.55	3288.98	2265.8
1384	4428.49	5345.92	2678.25			2178.55	3291.63	2268.45
1385	3368.3	626.599	1911.52			2178.55	3302.2	2268.45
1386	1046.97	592.228	1969.69			2178.55	3302.2	2268.45
1387	3778.1	2683.53	1015.25			2178.55	3304.84	2268.45
1388	758.792	4743.11	1374.82			2181.2	3310.13	2271.09
1389	3249.32	1620.7	1742.31			2181.2	3312.78	2271.09
1390	2987.58	4632.07	1998.77			2181.2	3312.78	2273.73
1391	1380.1	3170.01	1411.83			2183.84	3312.78	2273.73
1392	2445.59	8896.64	4669.09			2183.84	3312.78	2276.38
1393	1417.12	1525.52	2583.07			2183.84	3318.06	2276.38
1394	1009.96	3460.83	766.724			2183.84	3323.35	2276.38
1395	1639.2	2490.53	885.698			2183.84	3331.28	2279.02
1396	859.26	3682.92	1509.65			2186.49	3336.57	2279.02
1397	1372.17	690.052	2376.84			2189.13	3339.22	2279.02
1398	2432.37	5433.17	3669.7			2189.13	3341.86	2279.02
1399	3434.39	5798.02	1427.69			2191.77	3341.86	2281.66
1400	883.055	703.271	1097.21			2191.77	3344.5	2281.66
1401	671.545	2403.28	2506.39			2191.77	3344.5	2281.66
1402	1982.91	4499.88	1298.14			2191.77	3347.15	2281.66
1403	3973.75	1647.13	1218.83			2194.42	3347.15	2284.31
1404	2173.27	5266.6	3920.87			2194.42	3349.79	2284.31
1405	949.151	2561.92	2868.61			2194.42	3355.08	2284.31
1406	2728.48	769.368	3558.66			2194.42	3355.08	2286.95
1407	1694.72	1210.9	2530.19			2197.06	3360.37	2289.6
1408	3585.1	433.596	4179.97			2197.06	3365.65	2289.6
1409	1710.59	2992.87	883.055			2197.06	3368.3	2292.24
1410	2683.53	824.889	1641.85			2197.06	3368.3	2292.24
1411	4082.14	3323.35	2501.11			2199.7	3368.3	2292.24
1412	1358.95	2762.85	2773.43			2199.7	3373.59	2294.88
1413	1237.33	3548.08	1673.57			2199.7	3373.59	2297.53
1414	1165.95	6252.77	1530.8			2199.7	3376.23	2297.53
1415	2538.12	3992.25	1012.6			2204.99	3381.52	2300.17
1416	1644.49	4491.95	2099.24			2204.99	3381.52	2300.17
1417	727.066	3783.39	819.602			2204.99	3384.16	2302.82
1418	5261.31	3217.6	1871.86			2207.64	3384.16	2305.46
1419	4185.26	1054.91	1097.21			2210.28	3384.16	2305.46
1420	4314.81	782.587	1591.61			2210.28	3392.09	2308.1
1421	1781.97	3225.53	2339.83			2210.28	3394.74	2308.1
1422	4068.93	1639.2	1253.2			2210.28	3394.74	2308.1
1423	4640	1856	1853.36			2210.28	3397.38	2310.75
1424	1742.31	2955.85	3296.91			2210.28	3400.02	2310.75
1425	774.656	6131.15	4306.87			2212.92	3405.31	2310.75
1426	2091.31	1491.15	3505.78			2212.92	3407.96	2313.39
1427	1406.54	4883.24	668.901			2212.92	3413.24	2313.39
1428	1139.51	1295.5	1467.35			2215.57	3413.24	2318.68
1429	2501.11	1541.38	2302.82			2215.57	3415.89	2321.32
1430	869.835	4695.52	1411.83			2215.57	3418.53	2321.32
1431	2146.83	2757.56	3434.39			2218.21	3421.18	2321.32
1432	2641.23	2924.13	3180.58			2218.21	3421.18	2321.32
1433	2974.36	3312.78	2033.14			2218.21	3423.82	2321.32
1434	5224.3	3889.14	2805.15			2218.21	3423.82	2323.97
1435	1393.32	2046.36	3481.98			2220.86	3431.75	2323.97
1436	1467.35	5131.76	1105.14			2220.86	3437.04	2323.97
1437	2516.97	1311.36	1036.4			2220.86	3439.68	2323.97
1438	2041.07	1943.25	2585.71			2220.86	3439.68	2323.97
1439	1911.52	3016.66	1078.7			2223.5	3439.68	2323.97
1440	2075.44	1684.15	2567.2			2223.5	3439.68	2323.97
1441	951.795	3233.46	2395.35			2223.5	3442.33	2326.61
1442	2345.12	4687.59	1507.01			2223.5	3444.97	2326.61
1443	1914.17	1824.27	2720.55			2223.5	3444.97	2326.61
1444	3466.12	2011.99	1665.64			2226.14	3447.61	2326.61
1445	1845.43	1639.2	2064.87			2228.79	3447.61	2326.61
1446	2717.9	898.918	2913.55			2228.79	3450.26	2326.61
1447	713.847	2437.65	1916.81			2231.43	3452.9	2326.61
1448	872.479	4098.01	2535.48			2231.43	3452.9	2329.25
1449	5205.79	2630.66	1525.52			2231.43	3455.55	2329.25
1450	2107.17	1581.04	1615.41			2231.43	3458.19	2331.9
1451	1126.29	4227.56	1678.86			2231.43	3460.83	2334.54
1452	1586.33	3397.38	2739.06			2231.43	3460.83	2337.19
1453	1681.51	959.727	3809.83			2234.08	3466.12	2337.19
1454	2004.06	4288.37	3204.38			2234.08	3466.12	2337.19
1455	3746.37	5562.72	1509.65			2236.72	3474.05	2337.19
1456	5398.79	5565.36	1869.22			2236.72	3476.7	2339.83
1457	2873.89	3088.05	1247.91			2239.36	3476.7	2339.83
1458	3455.55	4732.54	1813.7			2239.36	3476.7	2339.83
1459	2107.17	4563.33	3788.67			2242.01	3481.98	2339.83
1460	2887.11	4531.6	1903.59			2242.01	3487.27	2342.47
1461	4669.09	2998.16	1848.07			2244.65	3487.27	2342.47
1462	4912.32	3997.54	2813.08			2244.65	3487.27	2342.47
1463	2191.77	975.59	3418.53			2244.65	3487.27	2342.47
1464	1956.47	1956.47	2390.06			2247.29	3487.27	2345.12
1465	3378.87	4840.94	1155.37			2247.29	3489.92	2347.76
1466	1372.17	6421.97	1660.35			2249.94	3489.92	2347.76
1467	3278.41	2892.4	1195.03			2252.58	3489.92	2347.76
1468	1448.84	4098.01	1213.54			2257.87	3489.92	2347.76
1469	1406.54	6337.37	1927.39			2257.87	3489.92	2350.41
1470	1041.69	2598.93	2146.83			2257.87	3495.2	2350.41
1471	4404.7	4944.05	1739.67			2260.51	3500.49	2350.41
1472	2516.97	3188.51	1009.96			2260.51	3508.42	2350.41
1473	682.12	3712	1551.96			2260.51	3508.42	2353.05
1474	637.174	4224.91	3558.66			2263.16	3508.42	2355.69
1475	732.354	2400.64	2842.17			2263.16	3513.71	2355.69
1476	1914.17	1856	2551.34			2263.16	3521.64	2358.34
1477	1681.51	4325.38	975.59			2263.16	3521.64	2358.34
1478	1298.14	1702.66	3109.2			2263.16	3526.93	2358.34
1479	3947.31	1395.97	2070.15			2263.16	3529.57	2360.98
1480	2897.69	647.75	1472.64			2265.8	3532.22	2360.98
1481	1911.52	2186.49	721.778			2265.8	3534.86	2360.98
1482	3410.6	404.513	1922.1			2271.09	3537.51	2360.98
1483	2154.76	4632.07	2313.39			2273.73	3537.51	2363.63
1484	3085.4	798.451	2197.06			2273.73	3540.15	2363.63
1485	1739.67	3500.49	1115.72			2276.38	3548.08	2363.63
1486	2289.6	1980.26	2154.76			2279.02	3548.08	2363.63
1487	1332.51	5916.99	1647.13			2279.02	3550.73	2363.63
1488	3363.01	1512.3	3767.52			2279.02	3553.37	2366.27
1489	1123.65	1525.52	1271.7			2279.02	3556.01	2366.27
1490	1610.12	3807.18	1057.55			2281.66	3556.01	2366.27
1491	2717.9	1314.01	2532.83			2281.66	3558.66	2368.91
1492	914.781	3106.55	1369.53			2284.31	3558.66	2368.91
1493	3878.57	2252.58	2876.54			2284.31	3558.66	2371.56
1494	1713.23	7257.44	2130.96			2286.95	3563.94	2374.2
1495	4272.5	2302.82	2064.87			2286.95	3563.94	2376.84
1496	3032.53	5676.4	3489.92			2289.6	3566.59	2376.84
1497	3307.49	6971.9	1713.23			2289.6	3566.59	2376.84
1498	1678.86	1826.92	1850.71			2292.24	3569.23	2376.84
1499	1089.28	2725.84	3029.88			2292.24	3571.88	2379.49
1500	1961.76	5052.45	2765.49			2292.24	3574.52	2379.49
1501	3934.09	4714.03	1448.84			2294.88	3579.81	2382.13
1502	4473.44	5718.7	1343.09			2294.88	3585.1	2384.78
1503	692.696	1488.5	2649.16			2294.88	3587.74	2384.78
1504	2987.58	2900.33	2720.55			2297.53	3587.74	2387.42
1505	875.123	3040.46	3968.46			2300.17	3587.74	2387.42
1506	3072.18	4531.6	2538.12			2302.82	3587.74	2387.42
1507	3132.99	645.106	3936.73			2302.82	3587.74	2390.06
1508	1596.9	2955.85	3294.27			2302.82	3590.38	2392.71
1509	4515.74	1417.12	4698.17			2302.82	3590.38	2392.71
1510	962.371	2498.46	3053.68			2305.46	3590.38	2392.71
1511	1980.26	602.804	1517.58			2305.46	3590.38	2395.35
1512	3585.1	6213.11	1980.26			2305.46	3593.03	2395.35
1513	1329.87	2376.84	1861.29			2310.75	3600.96	2395.35
1514	2683.53	7289.17	3056.32			2316.04	3600.96	2398
1515	3505.78	6086.2	734.998			2316.04	3603.6	2398
1516	1863.93	576.365	2913.55			2318.68	3603.6	2400.64
1517	2575.14	2662.38	941.22			2318.68	3603.6	2400.64
1518	1094.56	3841.55	1618.05			2321.32	3603.6	2400.64
1519	4428.49	3558.66	1985.55			2321.32	3606.25	2403.28
1520	941.22	6614.98	2178.55			2321.32	3614.18	2403.28
1521	3936.73	386.006	1559.89			2321.32	3616.82	2403.28
1522	1041.69	3476.7	896.274			2323.97	3619.47	2405.93
1523	1660.35	2419.15	1282.28			2323.97	3619.47	2405.93
1524	1705.3	2514.33	1977.62			2323.97	3622.11	2408.57
1525	1673.57	364.855	3080.12			2329.25	3627.4	2408.57
1526	687.408	4092.72	1083.99			2329.25	3630.04	2408.57
1527	2881.82	2553.98	1068.13			2329.25	3632.69	2408.57
1528	1427.69	1514.94	713.847			2331.9	3635.33	2408.57
1529	1811.06	4293.65	2736.41			2331.9	3637.97	2411.21
1530	3021.95	2828.95	650.393			2334.54	3637.97	2411.21
1531	1943.25	928	748.217			2334.54	3637.97	2413.86
1532	3312.78	2046.36	3719.93			2337.19	3640.62	2416.5
1533	806.382	1205.61	1364.24			2337.19	3645.91	2416.5
1534	3532.22	3035.17	1422.41			2337.19	3645.91	2416.5
1535	2511.68	4769.55	3304.84			2339.83	3645.91	2419.15
1536	1882.44	3780.74	1663			2339.83	3653.84	2419.15
1537	1409.19	4444.36	1202.96			2342.47	3661.77	2419.15
1538	3363.01	2059.58	2942.63			2342.47	3661.77	2421.79
1539	1887.73	4206.41	1184.46			2342.47	3667.06	2424.43
1540	1721.16	573.721	2680.89			2345.12	3667.06	2424.43
1541	872.479	4211.69	4190.54			2345.12	3672.34	2424.43
1542	1165.95	2144.18	1380.1			2345.12	3674.99	2424.43
1543	1438.27	1890.37	7408.14			2347.76	3682.92	2424.43
1544	2583.07	4441.71	1509.65			2350.41	3682.92	2424.43
1545	2321.32	6080.91	2583.07			2350.41	3688.21	2427.08
1546	2183.84	10025.6	988.81			2353.05	3688.21	2429.72
1547	859.26	2281.66	4661.15			2353.05	3690.85	2432.37
1548	978.234	1406.54	1245.27			2353.05	3693.49	2432.37
1549	4848.87	3881.21	1300.79			2353.05	3693.49	2435.01
1550	1525.52	4565.97	1401.25			2358.34	3693.49	2435.01
1551	1099.85	2860.67	1020.54			2360.98	3693.49	2437.65
1552	2694.11	3775.45	999.385			2360.98	3696.14	2440.3
1553	1832.21	3196.45	1771.4			2363.63	3698.78	2440.3
1554	4531.6	2789.29	999.385			2363.63	3698.78	2440.3
1555	1425.05	2852.74	4098.01			2363.63	3698.78	2445.59
1556	4029.27	6482.78	2149.47			2363.63	3701.43	2445.59
1557	2088.66	3558.66	3201.73			2363.63	3701.43	2448.23
1558	3291.63	3360.37	3225.53			2363.63	3704.07	2450.87
1559	1586.33	470.61	2696.75			2366.27	3704.07	2453.52
1560	3751.66	1787.26	3246.68			2368.91	3706.71	2456.16
1561	4478.73	1755.53	2017.28			2374.2	3706.71	2458.8
1562	4092.72	1544.02	3312.78			2374.2	3706.71	2461.45
1563	1250.55	5898.49	3537.51			2374.2	3706.71	2461.45
1564	2651.81	3291.63	2543.41			2374.2	3706.71	2461.45
1565	1121	7006.27	1147.44			2374.2	3709.36	2461.45
1566	4346.53	2376.84	1340.45			2374.2	3709.36	2464.09
1567	1504.37	3778.1	2945.28			2376.84	3712	2464.09
1568	3767.52	1409.19	3376.23			2376.84	3712	2464.09
1569	909.493	6316.22	853.972			2376.84	3714.65	2464.09
1570	1192.39	6887.3	2445.59			2379.49	3717.29	2464.09
1571	4587.12	5755.72	3114.49			2382.13	3719.93	2466.74
1572	3318.06	3045.75	3862.7			2384.78	3722.58	2469.38
1573	1768.75	6707.51	2464.09			2384.78	3722.58	2469.38
1574	3585.1	4687.59	2271.09			2387.42	3722.58	2469.38
1575	2466.74	3696.14	1842.78			2387.42	3725.22	2469.38
1576	2154.76	2464.09	1382.75			2387.42	3730.51	2469.38
1577	1908.88	6054.48	1147.44			2392.71	3730.51	2474.67
1578	3138.28	7569.42	912.137			2392.71	3733.15	2474.67
1579	4304.23	3870.63	2643.88			2392.71	3733.15	2477.31
1580	922.713	2831.59	3011.37			2392.71	3749.02	2479.96
1581	1118.36	2778.71	4817.14			2392.71	3749.02	2479.96
1582	3074.83	364.855	1557.24			2395.35	3749.02	2479.96
1583	1803.12	1636.56	2186.49			2398	3751.66	2479.96
1584	1737.03	1419.76	2350.41			2398	3751.66	2479.96
1585	1239.98	5927.57	4092.72			2400.64	3754.3	2479.96
1586	3241.39	2160.05	1660.35			2400.64	3756.95	2479.96
1587	756.149	1752.89	3727.87			2400.64	3756.95	2485.24
1588	2363.63	4132.38	3622.11			2400.64	3762.24	2485.24
1589	4092.72	1221.47	1295.5			2405.93	3762.24	2485.24
1590	1070.77	5927.57	3775.45			2405.93	3762.24	2487.89
1591	938.576	3722.58	2194.42			2405.93	3767.52	2487.89
1592	3111.84	4047.77	2297.53			2405.93	3767.52	2493.18
1593	3349.79	4108.58	724.422			2405.93	3770.17	2493.18
1594	3854.77	2955.85	2360.98			2408.57	3772.81	2493.18
1595	2078.09	4380.9	2469.38			2408.57	3775.45	2495.82
1596	3749.02	4343.89	2138.9			2408.57	3775.45	2498.46
1597	1451.49	3151.5	2197.06			2411.21	3775.45	2498.46
1598	4830.36	4042.49	1369.53			2411.21	3778.1	2501.11
1599	1208.25	552.57	2781.36			2413.86	3780.74	2501.11
1600	1372.17	1163.31	1826.92			2413.86	3780.74	2503.75
1601	2260.51	1348.38	2157.4			2416.5	3783.39	2503.75
1602	3088.05	5158.2	2847.45			2416.5	3783.39	2506.39
1603	3487.27	1911.52	3696.14			2416.5	3783.39	2506.39
1604	2842.17	991.453	1221.47			2416.5	3786.03	2506.39
1605	2675.6	3180.58	1009.96			2419.15	3788.67	2506.39
1606	3944.66	6889.94	1697.37			2421.79	3791.32	2509.04
1607	3434.39	4928.18	2136.25			2421.79	3796.61	2509.04
1608	1816.34	3709.36	3873.28			2421.79	3796.61	2509.04
1609	3693.49	4047.77	3955.24			2421.79	3801.89	2514.33
1610	2458.8	2326.61	1885.08			2424.43	3804.54	2516.97
1611	737.641	3045.75	2728.48			2427.08	3807.18	2516.97
1612	1570.46	2540.76	2181.2			2427.08	3807.18	2519.61
1613	1882.44	2506.39	1594.26			2427.08	3809.83	2519.61
1614	692.696	4082.14	1393.32			2427.08	3809.83	2524.9
1615	3281.05	4962.56	1403.9			2429.72	3812.47	2524.9
1616	3846.84	4626.78	3965.81			2429.72	3817.76	2527.55
1617	1208.25	6503.93	1356.31			2429.72	3820.4	2527.55
1618	3006.09	4000.18	1409.19			2432.37	3825.69	2530.19
1619	4045.13	1908.88	713.847			2432.37	3828.33	2530.19
1620	4246.06	3883.85	3341.86			2432.37	3828.33	2530.19
1621	1911.52	2754.92	2773.43			2437.65	3828.33	2530.19
1622	1636.56	2257.87	2014.63			2437.65	3830.98	2532.83
1623	700.627	3286.34	785.231			2440.3	3830.98	2535.48
1624	2881.82	6152.3	1692.08			2442.94	3833.62	2538.12
1625	2136.25	1295.5	2358.34			2442.94	3841.55	2538.12
1626	3093.33	325.197	4016.05			2442.94	3844.2	2538.12
1627	1639.2	962.371	2741.7			2445.59	3854.77	2540.76
1628	2501.11	3635.33	1898.3			2445.59	3854.77	2540.76
1629	4320.09	732.354	2538.12			2445.59	3857.42	2543.41
1630	1480.57	1631.27	3119.77			2448.23	3857.42	2543.41
1631	1647.13	3053.68	1491.15			2448.23	3860.06	2543.41
1632	1089.28	5232.23	890.986			2450.87	3860.06	2546.05
1633	3127.71	5583.87	4864.73			2450.87	3862.7	2548.7
1634	3072.18	4936.12	3667.06			2450.87	3865.35	2548.7
1635	2429.72	5269.24	4029.27			2453.52	3865.35	2551.34
1636	1276.99	2464.09	3286.34			2453.52	3870.63	2551.34
1637	1364.24	2133.61	3154.14			2453.52	3875.92	2551.34
1638	2223.5	1282.28	2551.34			2456.16	3878.57	2551.34
1639	2400.64	3579.81	756.149			2456.16	3881.21	2553.98
1640	2707.33	9187.47	2120.39			2456.16	3883.85	2553.98
1641	1768.75	4560.69	3437.04			2456.16	3883.85	2556.63
1642	1906.23	4045.13	3244.04			2458.8	3886.5	2556.63
1643	3238.75	3183.23	1358.95			2458.8	3889.14	2556.63
1644	1295.5	333.128	1729.09			2458.8	3894.43	2559.27
1645	1287.57	5618.24	1898.3			2458.8	3902.36	2559.27
1646	2033.14	2490.53	1128.94			2458.8	3905	2559.27
1647	4457.57	4743.11	2268.45			2461.45	3907.65	2559.27
1648	2879.18	6472.21	1522.87			2461.45	3912.94	2559.27
1649	4626.78	2022.57	3251.97			2464.09	3915.58	2561.92
1650	4312.16	3201.73	1953.82			2466.74	3915.58	2564.56
1651	1591.61	391.294	2498.46			2466.74	3915.58	2564.56
1652	5137.05	4449.64	1906.23			2466.74	3923.51	2567.2
1653	2115.1	3915.58	1477.93			2469.38	3931.44	2567.2
1654	980.878	3907.65	1758.18			2469.38	3931.44	2567.2
1655	1845.43	3077.47	1269.06			2472.02	3934.09	2567.2
1656	2879.18	388.65	4164.1			2474.67	3936.73	2569.85
1657	2413.86	3098.62	1406.54			2477.31	3936.73	2569.85
1658	1856	2934.7	2992.87			2477.31	3936.73	2569.85
1659	2049	3637.97	1303.43			2477.31	3944.66	2569.85
1660	4140.31	1961.76	3598.32			2479.96	3944.66	2569.85
1661	4185.26	1633.92	2630.66			2479.96	3947.31	2572.49
1662	2215.57	4510.45	2715.26			2479.96	3952.59	2572.49
1663	4150.89	4872.66	3875.92			2482.6	3955.24	2572.49
1664	1533.45	1657.71	4222.27			2482.6	3955.24	2575.14
1665	711.203	2815.73	1163.31			2485.24	3957.88	2577.78
1666	1686.79	1514.94	1271.7			2485.24	3960.53	2577.78
1667	1446.2	4053.06	687.408			2487.89	3960.53	2577.78
1668	875.123	4417.92	840.753			2490.53	3971.1	2577.78
1669	1446.2	4880.6	3598.32			2490.53	3973.75	2580.42
1670	2762.85	4436.42	2662.38			2490.53	3976.39	2580.42
1671	2506.39	2765.49	1684.15			2493.18	3976.39	2580.42
1672	3056.32	1581.04	1179.17			2493.18	3976.39	2583.07
1673	1033.76	4687.59	2326.61			2493.18	3981.68	2583.07
1674	1411.83	3971.1	983.522			2493.18	3984.32	2583.07
1675	1472.64	1930.03	1329.87			2495.82	3984.32	2583.07
1676	803.738	3437.04	1930.03			2498.46	3986.97	2583.07
1677	4531.6	4322.74	1118.36			2498.46	3989.61	2585.71
1678	3468.77	6125.86	1694.72			2498.46	3989.61	2588.35
1679	914.781	4867.38	3209.67			2498.46	3992.25	2591
1680	4806.57	1454.13	930.644			2498.46	3992.25	2591
1681	3979.03	2908.26	1557.24			2501.11	3992.25	2591
1682	1136.87	5890.56	3865.35			2501.11	3994.9	2593.64
1683	1877.15	1803.12	1631.27			2501.11	3997.54	2593.64
1684	1002.03	1663	4415.27			2501.11	3997.54	2593.64
1685	2220.86	1290.21	1351.02			2503.75	3997.54	2596.29
1686	1023.18	4534.25	970.302			2503.75	4000.18	2596.29
1687	2741.7	5282.46	1335.16			2506.39	4002.83	2598.93
1688	676.832	3725.22	2939.99			2506.39	4002.83	2598.93
1689	1953.82	3619.47	3185.87			2506.39	4008.12	2601.57
1690	3127.71	1179.17	994.097			2506.39	4010.76	2601.57
1691	2109.81	1361.6	2223.5			2506.39	4010.76	2606.86
1692	777.3	3209.67	2247.29			2506.39	4016.05	2609.51
1693	697.983	4552.75	2133.61			2509.04	4016.05	2612.15
1694	3000.8	1229.4	3238.75			2509.04	4018.69	2612.15
1695	2461.45	3701.43	2487.89			2511.68	4021.34	2612.15
1696	980.878	2916.2	2553.98			2514.33	4023.98	2622.72
1697	2672.96	2138.9	1739.67			2516.97	4023.98	2622.72
1698	4343.89	602.804	2006.7			2516.97	4023.98	2625.37
1699	3624.75	3590.38	2223.5			2516.97	4026.62	2628.01
1700	912.137	5261.31	1477.93			2516.97	4029.27	2628.01
1701	1345.73	2014.63	2791.93			2516.97	4034.55	2630.66
1702	1110.43	2556.63	2733.77			2516.97	4037.2	2630.66
1703	4462.86	6887.3	4536.89			2516.97	4037.2	2630.66
1704	1409.19	5528.34	3714.65			2519.61	4042.49	2630.66
1705	1916.81	2212.92	742.929			2519.61	4042.49	2633.3
1706	2260.51	3667.06	2088.66			2522.26	4042.49	2633.3
1707	708.559	2879.18	777.3			2522.26	4045.13	2635.94
1708	1641.85	1668.29	1528.16			2522.26	4045.13	2635.94
1709	1269.06	8024.16	2080.73			2522.26	4045.13	2635.94
1710	3577.16	2844.81	2004.06			2522.26	4047.77	2635.94
1711	1382.75	3698.78	2231.43			2522.26	4047.77	2635.94
1712	4544.82	3992.25	1546.67			2524.9	4047.77	2638.59
1713	2561.92	6998.34	1401.25			2524.9	4053.06	2638.59
1714	1290.21	4877.95	925.357			2527.55	4055.71	2638.59
1715	2630.66	1454.13	1633.92			2527.55	4060.99	2641.23
1716	2368.91	1700.01	1591.61			2530.19	4060.99	2641.23
1717	2540.76	359.567	2794.58			2530.19	4063.64	2643.88
1718	2818.37	2910.91	2154.76			2535.48	4063.64	2643.88
1719	2392.71	2331.9	1128.94			2535.48	4066.28	2643.88
1720	3458.19	666.257	3759.59			2538.12	4071.57	2643.88
1721	991.453	1615.41	3307.49			2540.76	4074.21	2643.88
1722	750.861	5568	2704.69			2540.76	4076.86	2646.52
1723	898.918	2696.75	2318.68			2540.76	4076.86	2646.52
1724	2643.88	1261.13	2559.27			2540.76	4076.86	2646.52
1725	4148.24	3381.52	3947.31			2543.41	4079.5	2646.52
1726	1054.91	1718.52	3971.1			2543.41	4079.5	2649.16
1727	2231.43	420.376	1118.36			2546.05	4079.5	2649.16
1728	2746.99	3481.98	1668.29			2546.05	4082.14	2649.16
1729	1171.24	2165.33	1160.66			2546.05	4082.14	2649.16
1730	1306.07	3347.15	3249.32			2546.05	4082.14	2649.16
1731	2059.58	4193.19	2088.66			2546.05	4084.79	2649.16
1732	1602.19	5290.4	3193.8			2551.34	4087.43	2649.16
1733	2926.77	6953.39	2569.85			2551.34	4087.43	2651.81
1734	3431.75	4206.41	1512.3			2553.98	4090.08	2654.45
1735	5139.69	1718.52	2749.63			2556.63	4092.72	2654.45
1736	959.727	4732.54	1398.61			2559.27	4095.36	2654.45
1737	1187.1	5134.41	1150.09			2559.27	4098.01	2657.1
1738	801.094	2334.54	2469.38			2559.27	4098.01	2657.1
1739	1525.52	4335.96	2387.42			2561.92	4098.01	2657.1
1740	3098.62	3563.94	4246.06			2561.92	4100.65	2657.1
1741	819.602	1694.72	1797.84			2561.92	4103.3	2659.74
1742	1488.5	6868.79	2022.57			2564.56	4103.3	2659.74
1743	2865.96	2831.59	1332.51			2567.2	4103.3	2662.38
1744	4507.81	475.898	3320.71			2569.85	4105.94	2665.03
1745	4124.45	1721.16	3109.2			2569.85	4108.58	2665.03
1746	2749.63	1625.98	1842.78			2569.85	4108.58	2665.03
1747	3619.47	3355.08	3844.2			2569.85	4111.23	2670.31
1748	3928.8	3222.88	2945.28			2575.14	4111.23	2672.96
1749	1943.25	2212.92	700.627			2575.14	4116.51	2672.96
1750	2363.63	4996.93	2112.46			2575.14	4119.16	2672.96
1751	4320.09	4283.08	758.792			2577.78	4121.8	2678.25
1752	1226.76	4098.01	2469.38			2577.78	4121.8	2678.25
1753	3645.91	2390.06	1229.4			2580.42	4124.45	2678.25
1754	3246.68	2580.42	3148.86			2580.42	4132.38	2678.25
1755	1147.44	3698.78	2937.35			2583.07	4132.38	2678.25
1756	920.069	2165.33	2609.51			2583.07	4135.02	2678.25
1757	1707.94	4719.32	2088.66			2585.71	4137.67	2678.25
1758	3360.37	425.664	1464.71			2585.71	4137.67	2678.25
1759	885.698	4016.05	2826.3			2585.71	4140.31	2680.89
1760	4103.3	2551.34	2844.81			2585.71	4142.95	2680.89
1761	4298.94	4751.05	2242.01			2585.71	4142.95	2683.53
1762	2281.66	5872.05	1700.01			2588.35	4145.6	2683.53
1763	1832.21	1866.58	851.328			2588.35	4153.53	2686.18
1764	4436.42	1705.3	3450.26			2588.35	4156.17	2686.18
1765	2720.55	1604.83	2308.1			2591	4156.17	2688.82
1766	4351.82	2665.03	1271.7			2598.93	4156.17	2688.82
1767	1271.7	2487.89	3693.49			2598.93	4156.17	2688.82
1768	769.368	4602.99	1110.43			2598.93	4166.75	2688.82
1769	3368.3	2128.32	1073.41			2598.93	4166.75	2688.82
1770	1274.35	3749.02	1541.38			2598.93	4169.39	2691.47
1771	1908.88	3423.82	3881.21			2601.57	4169.39	2694.11
1772	3838.91	3082.76	3788.67			2601.57	4177.32	2694.11
1773	3611.53	3704.07	1980.26			2604.22	4179.97	2694.11
1774	2580.42	5361.78	3230.82			2604.22	4182.61	2696.75
1775	1417.12	5390.86	1681.51			2606.86	4190.54	2699.4
1776	642.462	6017.46	3008.73			2606.86	4193.19	2699.4
1777	1041.69	4312.16	1742.31			2609.51	4195.83	2699.4
1778	3032.53	2749.63	2379.49			2612.15	4195.83	2699.4
1779	1345.73	4045.13	2321.32			2612.15	4201.12	2702.04
1780	1961.76	1861.29	801.094			2614.79	4206.41	2702.04
1781	4901.75	1575.75	3865.35			2614.79	4206.41	2704.69
1782	1623.34	4523.67	1578.39			2617.44	4211.69	2704.69
1783	1160.66	5367.07	4071.57			2617.44	4211.69	2704.69
1784	4597.7	1848.07	2778.71			2617.44	4211.69	2704.69
1785	2091.31	4706.1	2360.98			2620.08	4211.69	2707.33
1786	4922.9	489.117	3947.31			2620.08	4214.34	2707.33
1787	2569.85	4087.43	2276.38			2620.08	4214.34	2709.97
1788	1705.3	1670.93	3841.55			2625.37	4216.98	2709.97
1789	4396.77	623.955	1998.77			2625.37	4219.63	2709.97
1790	1269.06	3749.02	1858.64			2625.37	4224.91	2712.62
1791	4301.59	2091.31	2308.1			2625.37	4224.91	2712.62
1792	1528.16	1470	1052.26			2628.01	4227.56	2715.26
1793	3910.29	1610.12	4653.22			2630.66	4227.56	2715.26
1794	930.644	1927.39	2955.85			2630.66	4230.2	2715.26
1795	2009.35	3439.68	1520.23			2633.3	4230.2	2715.26
1796	835.465	1054.91	2350.41			2635.94	4235.49	2715.26
1797	3429.11	2842.17	1382.75			2641.23	4238.13	2717.9
1798	4269.86	4497.23	1665.64			2641.23	4243.42	2717.9
1799	3095.98	594.872	3027.24			2643.88	4243.42	2720.55
1800	1031.11	3632.69	3640.62			2643.88	4243.42	2720.55
1801	3125.06	2472.02	1226.76			2646.52	4243.42	2720.55
1802	2651.81	3672.34	2255.23			2646.52	4246.06	2720.55
1803	838.109	4462.86	1435.62			2649.16	4246.06	2720.55
1804	2477.31	6028.04	3043.1			2651.81	4248.71	2725.84
1805	2696.75	7093.52	2556.63			2651.81	4248.71	2725.84
1806	3310.13	1961.76	1625.98			2651.81	4248.71	2725.84
1807	1766.11	1581.04	2855.39			2651.81	4251.35	2725.84
1808	711.203	356.923	4370.33			2651.81	4267.22	2728.48
1809	2236.72	3622.11	5335.34			2651.81	4269.86	2728.48
1810	790.519	515.556	4185.26			2651.81	4272.5	2731.12
1811	1578.39	1588.97	2236.72			2651.81	4277.79	2733.77
1812	3027.24	1091.92	967.659			2654.45	4280.44	2736.41
1813	3674.99	518.2	2067.51			2654.45	4283.08	2736.41
1814	1628.63	7630.23	3458.19			2657.1	4283.08	2736.41
1815	1171.24	597.516	1607.48			2659.74	4285.72	2739.06
1816	4521.03	6874.08	3170.01			2659.74	4288.37	2739.06
1817	2630.66	1779.33	1522.87			2659.74	4288.37	2741.7
1818	2987.58	3886.5	1922.1			2659.74	4291.01	2741.7
1819	3254.61	1625.98	1551.96			2659.74	4291.01	2744.34
1820	2765.49	1879.8	682.12			2659.74	4293.65	2746.99
1821	2479.96	2789.29	3627.4			2659.74	4293.65	2746.99
1822	814.314	3312.78	1099.85			2662.38	4293.65	2746.99
1823	3460.83	3088.05	1171.24			2667.67	4293.65	2749.63
1824	1660.35	420.376	3571.88			2667.67	4296.3	2749.63
1825	835.465	803.738	3051.03			2670.31	4296.3	2749.63
1826	2659.74	3754.3	2051.65			2670.31	4304.23	2749.63
1827	1158.02	3955.24	2540.76			2670.31	4312.16	2752.27
1828	2025.21	4801.28	4238.13			2672.96	4312.16	2752.27
1829	5192.57	3286.34	4185.26			2672.96	4312.16	2752.27
1830	2815.73	6030.68	1824.27			2672.96	4317.45	2760.21
1831	1594.26	6689.01	1009.96			2672.96	4322.74	2760.21
1832	3241.39	6464.28	2323.97			2675.6	4322.74	2760.21
1833	4216.98	3701.43	2416.5			2675.6	4325.38	2762.85
1834	2691.47	4045.13	1033.76			2675.6	4328.03	2762.85
1835	4116.51	4291.01	1932.67			2678.25	4330.67	2762.85
1836	2617.44	1382.75	1464.71			2680.89	4330.67	2762.85
1837	1596.9	1332.51	3429.11			2680.89	4335.96	2765.49
1838	1131.58	6054.48	1308.72			2683.53	4335.96	2768.14
1839	1863.93	409.801	2191.77			2683.53	4338.6	2768.14
1840	1208.25	4666.44	2162.69			2686.18	4343.89	2768.14
1841	1967.04	3574.52	2424.43			2686.18	4343.89	2768.14
1842	1224.11	1554.6	2049			2686.18	4343.89	2768.14
1843	1200.32	1017.89	2670.31			2688.82	4349.18	2770.78
1844	4941.4	774.656	3172.65			2688.82	4349.18	2770.78
1845	3326	5470.18	1247.91			2688.82	4357.11	2773.43
1846	4838.29	1462.06	3125.06			2691.47	4359.75	2773.43
1847	4478.73	3513.71	2493.18			2691.47	4359.75	2776.07
1848	2144.18	2025.21	1324.58			2694.11	4365.04	2778.71
1849	1239.98	1276.99	2099.24			2694.11	4372.97	2778.71
1850	2479.96	1446.2	1335.16			2694.11	4375.61	2781.36
1851	4100.65	3667.06	1702.66			2696.75	4380.9	2781.36
1852	1625.98	6347.95	1509.65			2699.4	4380.9	2781.36
1853	1927.39	3127.71	3278.41			2699.4	4380.9	2781.36
1854	1308.72	634.53	2392.71			2702.04	4383.55	2781.36
1855	3180.58	4595.06	2323.97			2704.69	4388.83	2784
1856	1607.48	2366.27	1134.22			2704.69	4394.12	2784
1857	1811.06	356.923	1932.67			2707.33	4399.41	2786.65
1858	2051.65	1953.82	2736.41			2707.33	4407.34	2786.65
1859	4230.2	4140.31	2289.6			2707.33	4409.99	2789.29
1860	4616.21	4875.31	3553.37			2709.97	4417.92	2789.29
1861	2117.74	3606.25	4179.97			2709.97	4420.56	2789.29
1862	1197.68	727.066	1747.6			2712.62	4420.56	2791.93
1863	3928.8	5607.66	1454.13			2712.62	4425.85	2791.93
1864	2522.26	1287.57	2236.72			2712.62	4428.49	2794.58
1865	2842.17	1155.37	2895.04			2715.26	4428.49	2799.86
1866	2953.21	605.448	1046.97			2715.26	4431.14	2799.86
1867	1213.54	1068.13	2974.36			2717.9	4431.14	2799.86
1868	2022.57	1877.15	3873.28			2717.9	4433.78	2799.86
1869	1734.38	3251.97	2363.63			2717.9	4436.42	2805.15
1870	1795.19	4182.61	1900.95			2720.55	4439.07	2805.15
1871	637.174	1303.43	3191.16			2720.55	4441.71	2807.8
1872	2498.46	2733.77	2170.62			2720.55	4441.71	2807.8
1873	4209.05	325.197	1628.63			2723.19	4441.71	2807.8
1874	2612.15	5499.26	1721.16			2725.84	4441.71	2807.8
1875	1848.07	5351.21	3368.3			2728.48	4444.36	2807.8
1876	1462.06	364.855	2310.75			2728.48	4449.64	2807.8
1877	1052.26	346.348	3418.53			2728.48	4449.64	2807.8
1878	1115.72	972.946	1737.03			2731.12	4449.64	2810.44
1879	658.325	4296.3	1229.4			2731.12	4454.93	2813.08
1880	4407.34	6004.24	4293.65			2733.77	4457.57	2815.73
1881	3344.5	4103.3	4124.45			2736.41	4460.22	2818.37
1882	1142.15	7342.04	3029.88			2736.41	4462.86	2818.37
1883	1033.76	1261.13	1517.58			2736.41	4462.86	2818.37
1884	3029.88	4547.47	3976.39			2736.41	4465.51	2821.02
1885	2781.36	2242.01	1113.07			2739.06	4465.51	2823.66
1886	1501.72	2789.29	1422.41			2739.06	4481.37	2826.3
1887	1165.95	7336.76	2107.17			2739.06	4491.95	2826.3
1888	4428.49	4666.44	1324.58			2741.7	4494.59	2826.3
1889	2234.08	4803.92	1340.45			2741.7	4494.59	2828.95
1890	4431.14	2440.3	2953.21			2741.7	4497.23	2828.95
1891	4462.86	2998.16	2503.75			2744.34	4499.88	2828.95
1892	2707.33	978.234	2268.45			2744.34	4505.16	2839.52
1893	1427.69	6435.19	4452.29			2744.34	4510.45	2839.52
1894	1988.19	4047.77	1610.12			2744.34	4510.45	2839.52
1895	2913.55	7466.31	3167.36			2744.34	4513.1	2839.52
1896	3331.28	1779.33	1718.52			2744.34	4515.74	2839.52
1897	1448.84	5007.5	1789.9			2744.34	4518.38	2842.17
1898	737.641	697.983	2424.43			2746.99	4523.67	2844.81
1899	1189.74	1425.05	4330.67			2746.99	4531.6	2844.81
1900	1321.94	1726.45	1715.88			2746.99	4531.6	2844.81
1901	719.134	2746.99	1057.55			2746.99	4531.6	2844.81
1902	4550.11	2807.8	1557.24			2749.63	4531.6	2844.81
1903	1615.41	1483.21	3251.97			2749.63	4534.25	2847.45
1904	1792.55	5205.79	2218.21			2754.92	4536.89	2847.45
1905	3569.23	4724.61	2717.9			2757.56	4536.89	2850.1
1906	4407.34	4010.76	2011.99			2757.56	4536.89	2850.1
1907	872.479	415.089	3582.45			2757.56	4542.18	2855.39
1908	4782.77	1874.51	3191.16			2757.56	4544.82	2855.39
1909	3468.77	333.128	3418.53			2760.21	4547.47	2855.39
1910	1025.82	2702.04	2958.5			2762.85	4547.47	2855.39
1911	4187.9	6038.61	1247.91			2762.85	4550.11	2858.03
1912	1282.28	396.581	1221.47			2762.85	4552.75	2858.03
1913	4169.39	1181.81	4534.25			2765.49	4552.75	2865.96
1914	2694.11	2836.88	1710.59			2765.49	4558.04	2868.61
1915	4441.71	3733.15	3140.92			2770.78	4558.04	2868.61
1916	4140.31	3952.59	3548.08			2770.78	4560.69	2871.25
1917	2294.88	2672.96	1173.88			2770.78	4563.33	2871.25
1918	2223.5	4103.3	2768.14			2773.43	4563.33	2873.89
1919	1470	4587.12	2807.8			2773.43	4565.97	2873.89
1920	2300.17	5697.55	2725.84			2773.43	4568.62	2873.89
1921	880.411	4986.35	2646.52			2776.07	4573.91	2876.54
1922	3201.73	1689.44	1459.42			2778.71	4576.55	2876.54
1923	1945.89	1470	1245.27			2778.71	4581.84	2876.54
1924	1570.46	4359.75	4216.98			2781.36	4581.84	2879.18
1925	1086.63	5647.32	2255.23			2781.36	4587.12	2879.18
1926	3648.55	1525.52	2913.55			2784	4589.77	2887.11
1927	2678.25	2054.29	2310.75			2784	4595.06	2887.11
1928	816.958	7114.67	1509.65			2786.65	4595.06	2889.76
1929	803.738	579.009	2784			2786.65	4595.06	2892.4
1930	2720.55	7516.54	2360.98			2789.29	4597.7	2892.4
1931	3254.61	2257.87	4777.48			2789.29	4597.7	2895.04
1932	2953.21	5063.02	772.012			2789.29	4600.34	2895.04
1933	2863.32	3336.57	4481.37			2791.93	4602.99	2897.69
1934	3040.46	4637.36	1477.93			2791.93	4616.21	2897.69
1935	2419.15	1956.47	2744.34			2791.93	4621.5	2902.98
1936	1940.6	1467.35	1760.82			2791.93	4624.14	2905.62
1937	2154.76	378.074	1544.02			2797.22	4624.14	2905.62
1938	4539.54	2858.03	3021.95			2797.22	4626.78	2905.62
1939	2141.54	2797.22	2035.78			2799.86	4632.07	2905.62
1940	1620.7	2300.17	1385.39			2802.51	4632.07	2908.26
1941	2405.93	6522.44	2559.27			2802.51	4637.36	2908.26
1942	941.22	2942.63	3775.45			2802.51	4642.65	2908.26
1943	5245.45	386.006	3254.61			2807.8	4647.93	2910.91
1944	1324.58	4600.34	2752.27			2810.44	4650.58	2910.91
1945	1528.16	4655.87	1470			2810.44	4650.58	2910.91
1946	5525.7	2210.28	3680.28			2813.08	4655.87	2913.55
1947	732.354	4830.36	3363.01			2815.73	4658.51	2913.55
1948	2279.02	3931.44	1364.24			2815.73	4661.15	2913.55
1949	2850.1	4883.24	2226.14			2815.73	4666.44	2913.55
1950	2625.37	4023.98	4148.24			2818.37	4666.44	2913.55
1951	1676.22	2852.74	2902.98			2818.37	4666.44	2913.55
1952	3614.18	3109.2	2950.57			2818.37	4674.37	2913.55
1953	4478.73	2086.02	1565.17			2821.02	4674.37	2916.2
1954	4372.97	2799.86	2279.02			2821.02	4677.02	2916.2
1955	3378.87	2884.47	3571.88			2823.66	4677.02	2916.2
1956	2546.05	3466.12	1160.66			2826.3	4682.3	2916.2
1957	1665.64	2160.05	1607.48			2826.3	4687.59	2916.2
1958	5726.64	5808.6	650.393			2826.3	4687.59	2918.84
1959	1377.46	3302.2	1670.93			2826.3	4687.59	2921.48
1960	1126.29	3442.33	2030.5			2826.3	4687.59	2921.48
1961	2157.4	4661.15	2548.7			2831.59	4690.24	2921.48
1962	2212.92	2966.43	2294.88			2831.59	4695.52	2924.13
1963	2524.9	3994.9	869.835			2834.24	4695.52	2924.13
1964	4098.01	1327.23	861.904			2834.24	4695.52	2929.41
1965	4071.57	372.787	1821.63			2839.52	4706.1	2929.41
1966	3931.44	5142.34	3336.57			2842.17	4708.74	2929.41
1967	3037.81	5240.16	1591.61			2842.17	4708.74	2932.06
1968	3159.43	3712	3854.77			2842.17	4714.03	2932.06
1969	2294.88	2474.67	1721.16			2842.17	4716.67	2934.7
1970	1948.54	745.573	3373.59			2842.17	4719.32	2937.35
1971	1276.99	1845.43	3714.65			2844.81	4721.96	2937.35
1972	3735.8	3508.42	1232.05			2847.45	4724.61	2937.35
1973	1327.23	5441.1	1446.2			2847.45	4724.61	2939.99
1974	2226.14	3587.74	2300.17			2847.45	4727.25	2939.99
1975	3331.28	1298.14	2236.72			2850.1	4732.54	2939.99
1976	4002.83	803.738	3180.58			2850.1	4732.54	2939.99
1977	2651.81	1123.65	1422.41			2852.74	4743.11	2939.99
1978	3481.98	1208.25	1279.64			2852.74	4743.11	2942.63
1979	1644.49	1427.69	2075.44			2852.74	4751.05	2945.28
1980	1422.41	327.841	1388.03			2855.39	4761.62	2945.28
1981	2276.38	4076.86	1509.65			2858.03	4769.55	2945.28
1982	1351.02	4293.65	1319.29			2858.03	4769.55	2945.28
1983	2791.93	2025.21	2384.78			2860.67	4774.84	2945.28
1984	2913.55	6265.99	1308.72			2860.67	4780.13	2947.92
1985	2083.37	4621.5	2937.35			2863.32	4782.77	2950.57
1986	1113.07	7299.74	1877.15			2863.32	4782.77	2953.21
1987	4632.07	5182	2572.49			2863.32	4782.77	2953.21
1988	1351.02	5631.46	1150.09			2865.96	4788.06	2955.85
1989	2099.24	2123.03	2672.96			2865.96	4801.28	2955.85
1990	4053.06	3236.1	3318.06			2868.61	4803.92	2955.85
1991	1099.85	4095.36	3574.52			2868.61	4803.92	2955.85
1992	3907.65	5483.4	3299.56			2871.25	4809.21	2958.5
1993	3159.43	2133.61	6271.27			2873.89	4809.21	2958.5
1994	3875.92	3008.73	3397.38			2873.89	4814.5	2961.14
[truncated: 1,593 more rows]

## Sheet: A7- 0
L1	L2	L3	R1	R2	R3
							count	L1	L2	L3	R1	R2	R3				WT	A7
523.359	800.432	542.497	500.062	519.615	678.537		<500	0	0	0	0	0	0			<500	0	0
604.9	835.378	547.489	500.894	534.592	689.769		500-1000	30	4	42	52	60	25			500-1000	9.23	15.1
628.198	862.836	564.546	501.726	537.504	697.258		1000-1500	40	31	68	48	49	33			1000-1500	12.9244	19.8624
631.526	921.079	640.678	514.623	548.321	706.826		1500-2000	37	31	39	35	50	47			1500-2000	14.1634	17.825
666.056	1020.51	641.095	544.577	558.722	708.075		2000-2500	32	28	36	40	35	45			2000-2500	13.2496	16.1538
685.193	1020.93	672.712	547.073	572.866	732.204		2500-3000	36	31	22	39	35	48			2500-3000	11.6523	15.9386
703.082	1039.65	673.128	556.225	601.156	736.364		3000-3500	26	37	20	23	19	15			3000-3500	11.0838	10.9116
708.491	1044.64	682.697	579.939	615.301	740.941		3500-4000	3	9	4	3	6	1			3500-4000	10.2824	2.03551
737.612	1050.88	683.945	580.355	620.293	757.166		4000-4500	0	5	4	1	2	3			4000-4500	8.73556	1.17324
743.853	1079.17	685.193	582.851	623.205	779.215		4500-5000	0	1	1	0	1	1			4500-5000	6.97372	0.303976
757.998	1096.64	701.002	589.923	626.534	790.448		5000-5500	0	1	2	0	0	2			5000-5500	2.43434	0.384618
792.944	1103.71	702.25	613.221	628.198	802.928		5500-6000	3	0	1	0	0	0			5500-6000	1.33868	0.311281
817.489	1112.45	740.524	633.606	633.19	822.481		>6000	0	0	0	0	0	0			>6000	1.06806	0
831.218	1112.87	741.357	636.518	665.224	825.81
861.172	1124.52	742.605	648.583	666.888	851.603		total	207	178	239	241	257	220
861.588	1140.32	745.517	663.976	670.216	866.996												SEM	SEM
870.74	1141.16	751.341	673.961	674.793	914.007												0	0
883.221	1144.9	754.669	693.098	676.041	914.423												1.8	3.13895
885.717	1158.21	765.07	694.762	707.243	918.999		percent	L1	L2	L3	R1	R2	R3				1.69207	1.8649
901.11	1236.43	788.367	696.01	718.059	926.488		<500	0	0	0	0	0	0				1.06086	0.975108
909.015	1249.74	802.928	707.243	722.219	934.808		500-1000	14.4928	2.24719	17.5732	21.5768	23.3463	11.3636				1.25952	0.948203
926.488	1290.93	810.001	711.819	729.292	935.64		1000-1500	19.3237	17.4157	28.4519	19.917	19.0661	15				1.2923	1.72863
932.728	1290.93	828.722	713.067	733.036	953.113		1500-2000	17.8744	17.4157	16.318	14.5228	19.4553	21.3636				0.96799	2.1425
939.8	1310.48	840.37	733.036	742.189	968.506		2000-2500	15.4589	15.7303	15.0628	16.5975	13.6187	20.4545				0.243048	0.653534
939.8	1352.5	842.035	735.116	761.742	983.899		2500-3000	17.3913	17.4157	9.20502	16.1826	13.6187	21.8182				1.35139	0.411092
942.297	1379.95	847.859	735.116	770.894	1003.45		3000-3500	12.5604	20.7865	8.3682	9.54357	7.393	6.81818				2.30979	0.0990434
950.617	1382.04	848.691	754.253	773.807	1028.41		3500-4000	1.44928	5.05618	1.67364	1.24481	2.33463	0.454545				0.402892	0.178395
961.434	1388.69	888.629	755.917	774.223	1049.22		4000-4500	0	2.80899	1.67364	0.414938	0.77821	1.36364				0.471635	0.237634
973.499	1404.92	890.71	757.998	777.551	1100.39		4500-5000	0	0.561798	0.41841	0	0.389105	0.454545				0.378585	0
986.811	1407	893.622	765.486	778.383	1124.1		5000-5500	0	0.561798	0.83682	0	0	0.909091
995.548	1419.89	893.622	784.207	780.879	1133.25		5500-6000	1.44928	0	0.41841	0	0	0
1010.11	1436.53	897.782	791.696	791.28	1168.2		>6000	0	0	0	0	0	0
1026.33	1472.31	897.782	798.768	791.696	1211.05
1043.39	1472.31	906.518	801.264	794.608	1236.01
1048.38	1483.96	916.919	804.176	795.856	1236.43
1064.19	1484.38	926.904	804.592	796.272	1240.59
1073.76	1501.85	939.384	824.146	797.52	1248.08
1094.15	1519.32	943.129	849.107	802.928	1249.32
1102.88	1539.71	952.697	856.179	829.97	1277.61
1121.6	1565.92	956.025	874.485	840.371	1310.89
1130.76	1580.48	960.186	883.221	840.371	1319.22
1132.42	1599.62	967.674	884.885	849.939	1325.87
1133.67	1604.61	985.147	890.71	858.26	1331.28
1141.99	1679.08	1004.7	892.79	862.004	1335.86
1155.3	1681.57	1010.11	915.671	873.653	1340.43
1172.36	1685.73	1024.25	920.247	879.893	1365.39
1184.01	1698.21	1029.25	923.159	879.893	1374.55
1184.42	1717.35	1034.24	927.736	879.893	1379.12
1215.63	1721.93	1041.73	931.48	887.381	1385.36
1235.18	1723.18	1047.97	948.121	896.534	1397.01
1235.59	1736.9	1050.88	958.522	901.526	1399.09
1241	1757.29	1052.13	966.426	908.599	1421.14
1263.05	1766.44	1054.62	973.082	929.4	1425.3
1263.88	1795.15	1059.2	1004.7	936.888	1461.08
1288.43	1801.8	1063.78	1006.36	940.633	1465.66
1288.43	1823.44	1072.51	1019.26	953.529	1474.81
1292.17	1838.41	1077.5	1045.89	957.69	1474.81
1295.92	1840.91	1078.34	1046.3	966.01	1497.27
1308.4	1849.65	1080.83	1055.87	970.586	1517.24
1312.14	1863.79	1087.91	1070.85	978.491	1523.48
1326.7	1902.07	1090.82	1074.18	998.46	1530.97
1343.34	1918.29	1099.97	1088.74	1009.69	1534.3
1363.31	1935.35	1100.8	1097.89	1010.52	1537.21
1374.13	1949.91	1112.45	1113.7	1013.44	1552.61
1379.95	1950.74	1113.28	1116.61	1023.42	1556.77
1387.44	1959.48	1119.52	1129.51	1033.82	1571.74
1394.52	1994.84	1121.6	1131.59	1044.22	1575.07
1421.56	2036.03	1121.6	1135.75	1046.72	1580.06
1427.8	2048.92	1124.52	1139.91	1054.62	1583.81
1427.8	2050.17	1125.35	1168.61	1060.03	1588.38
1445.69	2051.42	1133.25	1172.36	1060.03	1593.79
1475.64	2066.81	1134.92	1177.35	1070.43	1595.87
1518.91	2071.39	1142.4	1179.85	1074.59	1622.08
1537.63	2073.05	1144.07	1185.67	1084.16	1625.41
1549.69	2085.95	1151.56	1195.66	1087.07	1626.66
1552.61	2120.9	1159.05	1201.9	1094.56	1636.64
1558.43	2142.11	1159.05	1203.14	1104.13	1637.47
1561.34	2159.59	1161.96	1203.98	1115.78	1643.3
1584.22	2194.95	1169.03	1211.05	1137	1669.92
1635.39	2204.1	1177.35	1214.79	1161.13	1673.67
1673.25	2226.57	1186.09	1216.87	1165.29	1674.5
1678.24	2255.69	1196.9	1245.16	1170.28	1676.16
1686.57	2264.01	1204.39	1245.99	1173.19	1678.24
1696.55	2271.08	1212.3	1274.28	1182.76	1678.66
1698.21	2279.82	1221.03	1275.53	1189	1726.09
1730.66	2288.55	1223.95	1275.95	1198.15	1743.56
1759.37	2293.55	1249.32	1308.81	1219.37	1748.14
1766.03	2295.63	1260.97	1313.39	1236.84	1765.61
1785.58	2322.25	1262.64	1351.67	1239.34	1778.92
1828.01	2334.32	1274.28	1352.08	1243.5	1788.08
1860.46	2442.48	1275.12	1353.33	1263.88	1793.9
1875.02	2443.31	1280.52	1396.6	1273.87	1794.73
1887.92	2474.52	1295.5	1402.42	1307.15	1805.55
1888.75	2480.34	1296.33	1409.91	1312.14	1809.71
1903.73	2496.15	1297.58	1432.37	1312.97	1818.86
1909.55	2496.57	1298.83	1444.02	1319.22	1821.77
1913.71	2515.7	1312.14	1451.93	1320.88	1837.58
1916.63	2518.62	1347.09	1461.5	1323.79	1841.33
1923.28	2526.1	1373.3	1466.49	1348.34	1864.62
1927.86	2543.58	1377.04	1477.72	1353.75	1893.75
1928.28	2548.15	1380.79	1484.38	1355.83	1898.32
1930.36	2553.15	1409.91	1495.19	1356.24	1964.89
1933.27	2554.39	1410.32	1512.67	1379.12	1989.85
1945.75	2577.69	1415.32	1513.08	1385.36	1994.42
1946.58	2586.01	1419.48	1517.24	1418.23	1999
1951.99	2605.15	1424.05	1528.89	1444.44	2013.98
1961.56	2630.94	1444.02	1541.37	1452.34	2021.88
1972.37	2653.82	1449.02	1542.62	1464.41	2037.69
1990.68	2673.79	1451.1	1544.7	1489.37	2038.11
2001.08	2676.29	1452.34	1545.53	1491.87	2070.56
2005.24	2682.95	1472.31	1555.52	1492.28	2075.55
2023.13	2692.1	1498.11	1558.01	1508.51	2080.54
2024.38	2696.67	1509.34	1575.49	1511.42	2085.12
2047.68	2719.56	1517.24	1579.23	1519.74	2108
2060.99	2730.79	1523.07	1591.3	1524.73	2133.38
2066.81	2734.53	1524.73	1605.02	1533.88	2140.03
2069.31	2734.53	1525.15	1615.43	1552.19	2142.11
2079.29	2747.85	1545.95	1656.61	1555.1	2143.78
2082.21	2761.16	1546.36	1657.86	1556.35	2144.61
2090.11	2781.13	1554.69	1665.76	1558.43	2148.77
2116.74	2849.36	1555.52	1704.87	1562.59	2149.19
2128.38	2858.09	1560.09	1715.69	1572.57	2196.61
2129.63	2884.72	1586.3	1716.52	1573.82	2198.28
2130.46	2916.75	1600.45	1737.32	1580.9	2232.39
2134.21	2916.75	1602.11	1741.9	1590.05	2239.05
2146.27	2937.14	1631.23	1743.14	1604.19	2254.02
2181.22	2960.85	1641.22	1771.85	1611.26	2261.1
2198.28	2987.48	1649.12	1776.84	1616.26	2261.93
2258.6	3007.44	1659.52	1778.92	1616.67	2297.29
2308.52	3009.94	1659.94	1785.16	1622.5	2311.85
2325.16	3018.68	1670.76	1820.11	1636.23	2323.5
2328.08	3037.4	1687.4	1831.34	1657.03	2338.48
2331.4	3044.05	1699.88	1857.55	1657.86	2345.55
2333.48	3068.6	1708.61	1912.88	1686.15	2365.1
2351.79	3074.01	1710.69	1922.87	1691.56	2367.6
2361.36	3092.73	1722.34	1923.7	1697.38	2368.43
2364.69	3103.96	1750.63	1931.6	1719.85	2383.41
2376.33	3124.35	1763.95	1999.42	1724.84	2390.9
2405.46	3141.82	1765.61	2000.66	1728.58	2400.05
2424.59	3143.07	1800.14	2016.06	1731.5	2403.38
2457.88	3157.21	1816.37	2076.38	1751.47	2418.77
2512.79	3162.62	1816.78	2091.36	1751.47	2420.85
2527.35	3165.95	1854.64	2093.02	1783.5	2426.26
2536.5	3202.14	1884.59	2099.68	1788.49	2437.49
2561.88	3205.06	1893.75	2104.25	1812.62	2446.23
2567.71	3206.72	1895.41	2108	1813.87	2449.56
2571.03	3216.71	1916.63	2172.07	1819.28	2453.72
2586.43	3223.36	1927.44	2175.39	1820.11	2458.71
2598.91	3247.91	1955.32	2184.55	1825.1	2469.11
2599.74	3254.56	1963.22	2198.69	1835.5	2484.92
2605.15	3274.12	1987.35	2200.77	1835.5	2501.14
2618.88	3299.08	1997.34	2202.44	1861.3	2513.21
2636.35	3319.46	2001.08	2222.82	1868.37	2515.7
2637.6	3327.78	2023.13	2256.1	1876.27	2521.11
2675.46	3334.02	2027.71	2258.18	1923.7	2531.1
2700	3362.31	2038.11	2260.68	1927.86	2533.59
2703.33	3367.31	2048.09	2280.65	1931.19	2544.41
2707.07	3393.52	2052.67	2280.65	1951.16	2547.74
2708.32	3400.59	2065.56	2303.95	1959.06	2552.73
2708.74	3408.08	2076.38	2333.9	1991.93	2553.98
2714.56	3413.07	2097.18	2338.89	1992.76	2563.55
2716.23	3427.63	2102.59	2347.21	1996.5	2565.21
2735.78	3430.96	2118.4	2361.77	2001.91	2577.69
2751.59	3438.03	2135.04	2365.1	2005.24	2580.19
2772.81	3481.3	2139.2	2377.17	2049.34	2596.83
2802.76	3484.63	2161.25	2389.65	2072.64	2608.06
2806.5	3547.45	2188.29	2392.56	2078.46	2608.48
2843.11	3549.94	2193.7	2392.98	2091.36	2619.29
2856.01	3561.17	2208.26	2411.28	2098.43	2623.45
2872.24	3625.66	2241.96	2412.95	2131.71	2624.7
2884.72	3627.74	2261.1	2414.19	2137.12	2636.35
2885.55	3669.34	2269	2415.44	2150.85	2652.99
2909.26	3726.75	2299.37	2417.94	2181.64	2679.62
2914.26	3772.93	2322.67	2422.93	2182.88	2680.87
2925.07	3871.11	2324.33	2441.23	2197.44	2687.52
2953.78	3881.1	2328.49	2449.56	2209.92	2690.43
2986.23	4025.46	2333.9	2462.04	2234.47	2718.31
2990.8	4124.06	2416.69	2465.78	2248.2	2718.72
3000.79	4165.24	2419.19	2472.44	2310.6	2721.64
3034.9	4235.97	2428.34	2510.71	2312.68	2746.18
3056.95	4258.02	2438.32	2511.96	2328.08	2750.76
3071.1	4542.16	2453.3	2539.42	2332.65	2751.17
3075.26	5291.01	2467.03	2541.08	2335.98	2751.59
3162.21	5772.35	2469.11	2548.99	2339.72	2757.83
3163.04	6181.72	2470.36	2551.48	2344.72	2762.82
3165.95	6269.91	2474.93	2559.39	2360.94	2764.9
3175.52	6270.33	2476.6	2589.76	2362.19	2772.81
3180.93	6364.35	2477.43	2611.39	2375.92	2806.09
3188	9275.28	2489.91	2616.38	2389.65	2811.08
3195.07		2510.29	2626.78	2418.35	2834.38
3199.23		2516.12	2636.35	2425.84	2843.11
3236.26		2528.18	2640.09	2458.29	2869.74
3272.45		2539.83	2651.74	2465.36	2878.48
3275.78		2568.12	2655.07	2473.68	2888.46
3297		2574.36	2656.74	2473.68	2899.28
3301.16		2583.93	2672.13	2484.92	2914.67
3316.55		2645.09	2682.11	2488.25	2921.74
3347.34		2680.87	2692.51	2491.16	2950.03
3368.14		2692.51	2700	2507.38	2996.21
3368.97		2722.47	2704.16	2513.62	3000.37
3375.63		2732.87	2745.77	2514.04	3005.78
3394.35		2736.61	2753.67	2576.86	3022.01
3407.24		2742.85	2762.82	2600.16	3043.22
3444.27		2765.32	2786.95	2610.56	3076.09
3483.38		2792.36	2800.26	2612.22	3077.34
3508.75		2794.44	2803.18	2632.61	3084.83
3526.64		2852.27	2824.81	2661.31	3124.76
3527.89		2853.1	2833.13	2680.45	3136
3622.75		2862.67	2841.03	2682.53	3153.47
3663.1		2881.81	2844.36	2699.17	3155.97
3916.88		2926.32	2858.09	2719.14	3220.03
5667.09		2935.89	2858.92	2738.28	3290.76
5879.68		3011.6	2879.31	2738.69	3338.6
5884.67		3051.96	2882.64	2742.44	3466.32
		3051.96	2898.03	2743.27	3740.9
		3058.62	2910.93	2747.85	4047.92
		3066.1	2923.41	2760.33	4086.2
		3068.6	2963.76	2760.74	4276.74
		3069.43	2969.59	2765.32	4571.28
		3074.84	3013.69	2766.98	5012.69
		3078.59	3019.51	2777.38	5013.52
		3090.65	3030.33	2790.28	7024.58
		3116.03	3039.89	2796.52
		3117.69	3050.3	2802.76
		3150.56	3055.7	2816.91
		3309.89	3056.12	2822.31
		3338.6	3059.03	2857.68
		3350.67	3082.33	2861.42
		3372.71	3085.24	2864.75
		3393.1	3088.15	2865.58
		3419.31	3092.73	2874.73
		3420.56	3094.81	2897.2
		3423.89	3095.23	2930.06
		3688.48	3111.87	2931.73
		3708.03	3126.43	3005.78
		3720.93	3133.5	3059.03
		3874.44	3134.75	3062.36
		4116.15	3155.13	3071.51
		4166.91	3184.26	3110.2
		4305.03	3204.22	3113.12
		4387.82	3257.48	3123.1
		4563.38	3328.62	3138.08
		5014.35	3417.23	3142.24
		5235.67	3659.77	3159.71
		5510.25	3724.67	3189.25
		6180.47	3950.57	3205.47
		6237.05	4216.41	3224.61
				3237.92
				3290.76
				3315.72
				3347.34
				3357.32
				3376.46
				3397.68
				3552.85
				3566.17
				3578.23
				3623.99
				3654.36
				3884.84
				4396.55
				4538.83

## Sheet: WT 5
	WT 5 #1	WT 5 #2	WT 5 #3
	31.6	105.9	94
	35.32	109.6	118		count	1	2	3
	48.5	119.5	127		<500	261	151	56
	53.4	130.6	135		500-1000	34	102	61
	55.9	134.3	150		1000-1500	0	0	17
	60.4	136.3	182		1500-2000	0	0	8
	62.01	137.2	210		2000-2500	0	0	2
	66.11	143	225		2500-3000	0	0	0
	66.5	169	230		3000-3500	0	0	0
	68.58	175	231		3500-4000	0	0	0
	76.8	176.2	232		4000-4500	0	0	0
	86.65	182.7	248		4500-5000	0	0	0
	87.47	188.5	249		5000-5500	0	0	0
	89.5	190	250		5500-6000	0	0	0
	89.93	190.5	253		>6000	0	0	0
	93.63	196	257			295	253	144
	96.09	199.2	264
	97.3	204.5	266
	97.3	209.4	281		percent	1	2	3			WT mean	Mean A7-
	102	214.8	290		<500	88.4746	59.6838	38.8889		<500	62.3491	73.1351
	110	218.1	291		500-1000	11.5254	40.3162	42.3611		500-1000	31.4009	23.0807
	111	218.1	313		1000-1500	0	0	11.8056		1000-1500	3.93519	3.00893
	120	222.2	319		1500-2000	0	0	5.55556		1500-2000	1.85185	0.775194
	120	222.6	321		2000-2500	0	0	1.38889		2000-2500	0.462963	0
	122.4	225.4	343		2500-3000	0	0	0		2500-3000	0	0
	123	225.9	343		3000-3500	0	0	0		3000-3500	0	0
	124	226.3	344		3500-4000	0	0	0		3500-4000	0	0
	126.5	227	350		4000-4500	0	0	0		4000-4500	0	0
	131	228.3	355		4500-5000	0	0	0		4500-5000	0	0
	133	235.7	363		5000-5500	0	0	0		5000-5500	0	0
	133.9	237.4	365		5500-6000	0	0	0		5500-6000	0	0
	134.3	239	373		>6000	0	0	0		>6000	0	0
	135	241	381
	135.1	243.5	384								SEM	SEM
	135.9	247.6	387								14.3761	6.61149
	138	248.9	389								9.95526	6.63957
	140	256.2	401								3.93519	0.881175
	141.7	258	406								1.85185	0.775194
	142.1	258.3	407								0.462963	0
	144	262	410								0	0
	145	262	410								0	0
	147.4	264.5	419								0	0
	150.7	265.7	443								0	0
	153.2	266.5	444								0	0
	153.2	267.3	446								0	0
	154.4	268.6	453								0	0
	154.8	274.7	455								0	0
	156	275	465
	156.5	276	468
	157	278	469
	157.7	278	470
	158	280.9	472
	158.5	281.7	472
	159.7	286.2	474
	161	287.5	479
	162.2	288	480
	163	291	492
	163.4	293	500
	164.3	294	501
	165.5	296.1	504
	166	297	507
	166.3	298	528
	167	299.4	538
	168	301	541
	170.4	304.3	543
	178.6	307	552
	180.7	308	559
	180.7	308.4	570
	181.1	310.9	573
	182	314.1	581
	182.7	316.6	584
	183.6	320.7	592
	185.6	324	598
	187.3	324.4	615
	188	327	642
	190.5	333.4	644
	192	337.1	652
	195.5	339	672
	195.5	343	678
	198	347	685
	199.2	349.9	689
	199.6	355	696
	200	357.7	697
	200.8	358.1	706
	206.1	358.5	722
	210	359.7	728
	213	360.1	742
	214.4	367.1	745
	214.4	370.4	756
	215	371.2	756
	215.6	373	757
	218	374	768
	218.5	377.8	770
	219	378.2	777
	220.1	379	779
	221.3	381	782
	222	381.5	785
	222.6	384	787
	223	385	803
	224	386.8	818
	224.6	388	832
	225.9	388.9	834
	226.7	395	837
	228.3	399.1	841
	231.6	399.6	841
	232.4	401	851
	236	407	853
	236.5	409	859
	236.573	412	860
	240.6	412.7	865
	242.3	413	877
	242.7	413.5	913
	243.9	416	935
	244	417	943
	247	417.6	957
	247.6	418.9	966
	249.7	423	967
	250.1	425.8	969
	251	426	973
	253	426.2	1010
	253.4	427.1	1023
	258.3	430.4	1048
	259	432	1079
	259.5	433.2	1101
	259.9	434.5	1121
	262	438.2	1139
	263	441	1148
	264	446	1149
	264	447.2	1162
	264	447.2	1187
	264	449.2	1187
	264	449.2	1200
	264.9	452.9	1214
	265.3	456.6	1223
	266	461.2	1268
	266.9	464	1276
	268.2	465.7	1306
	269	468.1	1322
	271.8	476	1323
	273.1	481.7	1356
	273.5	482.9	1360
	274	485	1364
	274.7	488.3	1411
	277.6	491.1	1429
	278	491.5	1451
	280.9	496.1	1515
	281.3	498	1543
	282.5	500.6	1551
	284	501.8	1557
	284.6	504.7	1564
	285.4	505	1601
	288	505.5	1610
	288.3	506.7	1619
	290	508	1625
	290.3	508.8	1664
	290.7	508.8	1711
	299.4	509.6	1737
	299.8	510.8	1842
	303	511	1844
	303.5	512.9	1857
	304.7	514.9	1864
	307.2	515	1931
	310	515	1934
	311	518.2	2038
	312.5	518.6	2050
	312.5	526.4	2072
	315	527.7	2099
	316.394	528	2161
	317	532	2260
	317.4	535.1	2262
	318.7	535.5	2499
	319	538	2689
	319.636	538.4	2871
	322.879	542	4334
	323	544.5
	326.121	545
	328.1	546
	329.3	547
	329.364	556.4
	330.6	563
	331	566
	331.4	568
	332.606	570
	333	575.3
	335.1	577.4
	335.1	579.4
	335.848	582.3
	336	588.5
	338	592.6
	339.091	602
	341.7	602
	342	609.4
	342.333	609.8
	344.9	622
	345.575	633
	346.6	635.3
	347	639
	348	639.4
	348.2	644.3
	348.818	645.1
	352.06	667
	352.7	671
	354	671.4
	354	673
	355.302	676
	355.6	683.7
	357.3	694
	358.545	694
	361.4	706.7
	361.787	718.6
	362	730
	363	730.1
	365.029	740.8
	368.272	742.4
	369.6	744
	371.514	744
	374.757	747
	376.1	753.9
	377.999	767
	380	767.1
	384.8	771
	386.4	774.9
	387.6	779
	391	780.6
	393	781
	394.2	795
	396.7	798
	398	805.7
	398.3	807.7
	399.6	814
	400.8	820.5
	402	825.4
	402	829
	404.5	829.5
	406.5	843.1
	407.8	845.9
	417.6	853
	418.9	858
	420	872
	430	876
	434.9	882.1
	435	910
	437.3	921.5
	444	935
	444.7	937.5
	445	942
	459.5	955.6
	463.6	963
	467	990
	470	996.2
	473.9
	473.9
	476
	479
	479.2
	487.8
	490
	490.7
	493
	495.6
	496.1
	499.8
	501
	502
	517.4
	520
	540
	549.9
	552
	555
	558.9
	561
	563
	571.6
	576.1
	584.8
	614.3
	614.7
	616
	616
	618
	637.7
	657
	674
	679
	686
	707
	731
	740.4
	757
	774.9
	775.3
	795.4
	831.6
	910
	935.9
	951.9
Sample mean	312.185	470.064	887.954
Sample SEM	9.81283	13.105	47.7442
Overall mean	556.734
Overall SEM	15.4521

## Sheet: A7- 5
	A7- 5 #1	A7- 5 #2	A7- 5 #3
	56	37	93
	76	42	112		Count	1	2	3
	92	57	115		<500	94	106	107
	96	59	118		500-1000	55	16	30
	104	67	122		1000-1500	7	4	2
	105	73	123		1500-2000	0	3	0
	112	77	124		2000-2500	0	0	0
	113	78	135		2500-3000	0	0	0
	114	80	136		3000-3500	0	0	0
	117	82	137		3500-4000	0	0	0
	129	85	140		4000-4500	0	0	0
	130	101	146		4500-5000	0	0	0
	132	103	152		5000-5500	0	0	0
	138	104	164		5500-6000	0	0	0
	140	104	183		>6000	0	0	0
	140	113	186			156	129	139
	146	116	187
	149	123	187
	151	125	188		Percent	1	2	3			Mean A7-
	152	125	195		<500	60.2564	82.1705	76.9784		<500	73.1351
	154	138	196		500-1000	35.2564	12.4031	21.5827		500-1000	23.0807
	158	139	200		1000-1500	4.48718	3.10078	1.43885		1000-1500	3.00893
	169	139	205		1500-2000	0	2.32558	0		1500-2000	0.775194
	171	139	205		2000-2500	0	0	0		2000-2500	0
	175	142	205		2500-3000	0	0	0		2500-3000	0
	176	143	211		3000-3500	0	0	0		3000-3500	0
	178	145	218		3500-4000	0	0	0		3500-4000	0
	179	146	220		4000-4500	0	0	0		4000-4500	0
	192	148	222		4500-5000	0	0	0		4500-5000	0
	193	149	223		5000-5500	0	0	0		5000-5500	0
	195	152	228		5500-6000	0	0	0		5500-6000	0
	197	153	229		>6000	0	0	0		>6000	0
	204	153	229
	205	154	230								SEM
	210	159	231								6.61149
	213	159	231								6.63957
	220	163	231								0.881175
	220	166	234								0.775194
	228	176	238								0
	236	178	239								0
	242	179	240								0
	251	185	243								0
	254	194	254								0
	263	196	255								0
	265	207	259								0
	266	209	269								0
	276	210	275								0
	278	215	279
	286	216	281
	286	217	283
	304	217	283
	304	219	286
	306	220	286
	307	222	301
	312	235	303
	313	239	305
	322	251	306
	325	256	211.86
	326	258	311
	326	260	313
	327	268	313
	327	272	320
	332	275	320
	344	283	324
	356	284	328
	361	291	331
	364	294	331
	368	303	335
	374	304	338
	381	304	344
	395	305	346
	399	307	346
	402	312	348
	407	325	353
	415	335	353
	424	335	354
	425	336	354
	428	340	356
	431	340	358
	432	340	363
	432	344	372
	448	347	378
	460	348	379
	461	348	379
	462	355	382
	470	356	403
	470	356	403
	471	375	407
	305.057	377	410
	476	379	414
	482	381	417
	486	390	417
	490	393	422
	493	393	426
	495	399	428
	507	407	431
	509	410	448
	515	427	448
	516	435	448
	519	445	449
	525	448	460
	527	475	462
	535	478	463
	536	490	467
	537	492	472
	538	496	488
	540	498	489
	546	517	497
	557	532	504
	567	542	515
	578	561	537
	579	562	542
	591	581	543
	596	600	549
	608	601	552
	621	646	570
	622	746	580
	622	760	587
	630	761	588
	651	857	588
	660	887	591
	660	917	617
	664	923	622
	668	1000	635
	669	1140	651
	672	1228	681
	678	1334	699
	691	1644	701
	696	1674	703
	715	1926	716
	730		750
	733		758
	746		787
	749		792
	749		797
	765		802
	788		816
	789		832
	790		849
	795		1076
	811		1207
	830
	873
	921
	927
	927
	938
	942
	968
	983
	1041
	1092
	1194
	1223
	1250
	1412
	1598
Sample mean	465.472	364.085	386.687
Sample SEM	23.0196	28.426	17.2973
Overall mean	408.722
Overall SEM	12.9442

## Sheet: WT 7 
Sample	1	2	3	4
	603	603.6	603.2	604.5
	603.2	605.3	606.1	626		count	1	2	3	4
	604.9	608.2	619.7	631		<500	4	6	3	5
	608.2	614.7	637.7	634		500-1000	42	70	26	40
	614.3	621	662.4	637.7		1000-1500	15	20	19	13
	621.3	629.9	668.5	643		1500-2000	28	25	18	34
	622.5	631.6	674.3	643		2000-2500	18	15	29	34
	629.5	636.9	678.8	648		2500-3000	23	9	30	32
	636.5	637.3	684.1	661.5		3000-3500	14	14	27	22
	645.1	656.2	702.6	662		3500-4000	12	9	14	21
	662	662.4	712.9	669.8		4000-4500	16	11	17	16
	668.5	663.2	724.8	673		4500-5000	15	9	10	10
	672.2	665.2	728.9	678		5000-5500	14	10	4	11
	674.7	668.1	753.9	681.7		5500-6000	6	9	0	5
	683.3	685.4	760.5	694		>6000	2	4	0	1
	683.3	686.2	764.2	696			209	211	197	244
	684.1	687.8	781.5	696
	684.1	696.5	782.3	742
	693.2	701	785.6	743		percent	1	2	3	4			WT mean	A7- mean
	712.1	718.2	788.8	759		<500	1.97044	2.98507	1.54639	2.10084		<500	2.15069	22.5748
	720.3	723.6	805.3	764.6		500-1000	20.6897	34.8259	13.4021	16.8067		500-1000	21.4311	25.7298
	730	724.4	806.1	768		1000-1500	7.38916	9.95025	9.79381	5.46218		1000-1500	8.14885	15.6239
	740	740.8	833	773.7		1500-2000	13.7931	12.4378	9.27835	14.2857		1500-2000	12.4487	10.8607
	758	740.8	837.7	774.5		2000-2500	8.867	7.46269	14.9485	14.2857		2000-2500	11.391	7.94873
	783.5	744.9	921.9	776		2500-3000	11.33	4.47761	15.4639	13.4454		2500-3000	11.1792	5.27271
	784.3	754.4	981	788		3000-3500	6.89655	6.96517	13.9175	9.2437		3000-3500	9.25574	2.89452
	789.3	754.4	1010	797.9		3500-4000	5.91133	4.47761	7.21649	8.82353		3500-4000	6.60724	2.31213
	790.9	758.9	1031	802.8		4000-4500	7.88177	5.47264	8.76289	6.72269		4000-4500	7.21	2.02613
	800	766.7	1101	809		4500-5000	7.38916	4.47761	5.15464	4.20168		4500-5000	5.30577	1.46021
	803.2	770.8	1113	817		5000-5500	6.89655	4.97512	2.06186	4.62185		5000-5500	4.63885	1.36515
	831.6	776.5	1121	870		5500-6000	2.95567	4.47761	0	2.10084		5500-6000	2.38353	0.969293
	844.7	780.2	1142	895		>6000	0.985222	1.99005	0	0.420168		>6000	0.84886	0.961894
	908.3	788	1146	895
	917.4	788	1166	903									SEM	SEM
	928.9	790.9	1220	903									0.302262	6.58557
	932.2	793.4	1220	922.7									4.70656	1.92882
	940.4	797.9	1220	942.4									1.07029	2.13204
	949	802.4	1281	944									1.12669	2.06541
	956	813.1	1318	969									1.88938	1.81246
	956.4	813.5	1318	997.5									2.38796	0.943618
	965	828.7	1335	1121									1.64684	1.40279
	969.1	830.7	1363	1158									0.926586	0.896503
	1023	835.2	1380	1220									0.714063	0.857128
	1043	836.5	1384	1257									0.722739	1.09281
	1072	850	1487	1277									0.993793	1.1277
	1183	864.8	1511	1300									0.93424	0.649297
	1183	868.9	1528	1314									0.430624	0.555555
	1195	869.3	1552	1320
	1199	870.2	1565	1322
	1216	875	1585	1429
	1265	882	1630	1429
	1339	887.4	1643	1430
	1403.5	894	1647	1430
	1421	910.8	1700	1510
	1487	913.7	1745	1519
	1491	914.1	1774	1540
	1491	919.8	1807	1540
	1507	922.7	1823	1577
	1510	927.6	1827	1593
	1528	930.5	1827	1647
	1544	945.3	1897	1684
	1552	953.5	1918	1696
	1556	962.5	1963	1710
	1589	974.9	2012	1725
	1589	975.3	2020	1730
	1597	979	2066	1750
	1610	979.8	2106	1815
	1614	992.1	2107	1819
	1622	997.9	2127	1827
	1630	999.1	2139	1860
	1630	1027	2144	1880
	1643	1084	2160	1900
	1716	1101	2168	1922
	1745	1105	2189	1951
	1762	1207	2197	1955
	1795	1207	2246	1980
	1868	1211	2267	2000
	1873	1326	2275	2020
	1877	1330	2295	2029
	1914	1363	2304	2040
	1926	1380	2337	2060
	1946	1392	2349	2066
	1967	1417	2361	2070
	1967	1445	2390	2090
	1988	1450	2419	2100
	2033	1454	2435	2115
	2037	1466	2439	2127
	2061	1466	2447	2135
	2131	1474	2456	2150
	2131	1495	2456	2164
	2135	1511	2472	2193
	2139	1565	2472	2238
	2217	1569	2534	2242
	2226	1671	2571	2250
	2230	1704	2575	2275
	2267	1704	2583	2287
	2295	1708	2599	2295
	2312	1712	2608	2324
	2312	1725	2612	2340
	2320	1753	2640	2350
	2390	1790	2661	2350
	2394	1819	2669	2382
	2493	1819	2673	2386
	2513	1831	2690	2390
	2525	1836	2714	2390
	2554	1877	2731	2402
	2558	1885	2743	2420
	2567	1889	2764	2450
	2571	1889	2776	2460
	2579	1934	2792	2472
	2632	1934	2805	2500
	2640	1955	2817	2540
	2653	1963	2838	2542
	2653	1967	2850	2550
	2669	1975	2854	2560
	2677	2016	2866	2580
	2735	2066	2866	2591
	2829	2172	2895	2595
	2875	2181	2903	2599
	2895	2271	2911	2640
	2903	2283	2916	2650
	2932	2287	2989	2670
	2965	2365	3018	2680
	2965	2374	3031	2694
	2989	2427	3055	2718
	2994	2435	3059	2730
	3063	2443	3088	2770
	3109	2447	3129	2780
	3117	2468	3137	2780
	3203	2472	3154	2790
	3207	2534	3158	2800
	3236	2612	3166	2820
	3269	2690	3199	2820
	3273	2698	3215	2870
	3318	2723	3219	2899
	3322	2743	3224	2944
	3359	2792	3228	2953
	3360	2879	3236	2960
	3400	2948	3265	2965
	3490	3022	3277	2970
	3519	3059	3314	2970
	3523	3088	3326	2990
	3585	3104	3343	3039
	3671	3170	3363	3039
	3737	3252	3412	3072
	3745	3293	3412	3092
	3749	3310	3421	3110
	3823	3314	3429	3130
	3930	3351	3429	3133
	3934	3392	3556	3166
	3979	3400	3573	3170
	3983	3404	3573	3265
	4004	3412	3593	3273
	4037	3552	3601	3330
	4086	3589	3618	3343
	4100	3638	3655	3343
	4119.97	3647	3704	3347
	4131	3647	3786	3380
	4152	3655	3840	3380
	4160	3671	3844	3392
	4234	3745	3848	3429
	4332	3900	3930	3470
	4373	4004	3975	3490
	4386	4074	4000	3499
	4390	4074	4020	3515
	4430	4100	4028	3519
	4484	4100	4053	3550
	4534	4168	4065	3568
	4575	4209	4069	3600
	4583	4267	4100	3601
	4620	4279.86	4111	3618
	4706	4312	4168	3640
	4731	4435	4168	3696
	4731	4501	4180	3730
	4739	4517	4226	3730
	4780	4525	4267	3761
	4805	4677	4304	3774
	4846	4735	4419	3790
	4846	4809	4480	3820
	4891	4829	4484	3864
	4969	4851.56	4612	3876
	4993	4891	4636	3893
	5047	5006	4661	3980
	5067	5117	4669	3987
	5088	5195	4722	3990
	5121	5195	4788	4000
	5125	5223	4821	4060
	5141	5252	4866	4060
	5199	5277	4936	4106
	5215	5289	4956	4110
	5240	5310	5092	4170
	5290	5379	5096	4193
	5400	5556	5182	4201
	5449	5572	5227	4240
	5466	5642	5408	4250
	5486	5671	5560	4390
	5515	5675	5757	4394
	5614	5737	5880	4394
	5675	5852	5889	4435
	5876	5921		4480
	5880	5963		4480
	5910			4500
				4517
				4600
				4607
				4628
				4628
				4640
				4665
				4731
				4915
				5010
				5010
				5055
				5080
				5129
				5133
				5180
				5280
				5310
				5494
				5499
				5577
				5687
				5690
				5840
				5885
Sample mean	2650.26	2275.67	2659.33	2653.31
Sample SEM	109.462	111.568	92.6094	91.3402
Overall mean	2562.45
Overall SEM	50.8469

## Sheet: A7- 7
	A7- 7 #1	A7- 7 #2	A7- 7 #3	A7- 7 #4
	55	47	34	103
	67	113	46	117		count	1	2	3	4
	114	115	53	145		<500	46	72	101	19
	117	143	81	149		500-1000	81	71	62	56
	123	148	89	161		1000-1500	57	42	32	33
	144	149	101	180		1500-2000	45	24	21	24
	167	149	103	236		2000-2500	23	26	7	27
	180	165	106	292		2500-3000	9	14	12	20
	183	213	114	339		3000-3500	2	2	9	17
	187	219	121	341		3500-4000	1	5	6	12
	218	220	122	363		4000-4500	1	6	3	11
	229	223	138	382		4500-5000	0	1	2	12
	232	226	141	400		5000-5500	0	0	2	12
	234	226	141	410		5500-6000	0	0	3	7
	235	244	143	422		>6000	0	0	5	5
	239	248	146	452			265	263	265	255
	244	251	149	463
	252	265	150	467
	252	281	164	468		percent	1	2	3	4			A7- mean
	252	288	175	519		<500	17.3585	27.3764	38.1132	7.45098		<500	22.5748
	264	301	188	531		500-1000	30.566	26.9962	23.3962	21.9608		500-1000	25.7298
	276	307	189	549		1000-1500	21.5094	15.9696	12.0755	12.9412		1000-1500	15.6239
	280	317	196	564		1500-2000	16.9811	9.12548	7.92453	9.41176		1500-2000	10.8607
	292	322	199	567		2000-2500	8.67925	9.88593	2.64151	10.5882		2000-2500	7.94873
	302	326	202	568		2500-3000	3.39623	5.32319	4.5283	7.84314		2500-3000	5.27271
	309	328	216	655		3000-3500	0.754717	0.760456	3.39623	6.66667		3000-3500	2.89452
	322	332	222	687		3500-4000	0.377358	1.90114	2.26415	4.70588		3500-4000	2.31213
	326	336	231	690.7		4000-4500	0.377358	2.28137	1.13208	4.31373		4000-4500	2.02613
	344	339	235	691.5		4500-5000	0	0.380228	0.754717	4.70588		4500-5000	1.46021
	349	340	237	697		5000-5500	0	0	0.754717	4.70588		5000-5500	1.36515
	352	345	237	702		5500-6000	0	0	1.13208	2.7451		5500-6000	0.969293
	356	345	240	703.4		>6000	0	0	1.88679	1.96078		>6000	0.961894
	376	350	241	704.3
	379	350	241	712									SEM
	394	353	242	717									6.58557
	399	355	246	723.8									1.92882
	402	360	251	724									2.13204
	404	385	257	729.3									2.06541
	410	386	257	742.9									1.81246
	420	387	269	744									0.943618
	443	387	277	744.6									1.40279
	452	399	281	747.8									0.896503
	464	406	284	748.7									0.857128
	472	407	291	750									1.09281
	474	407	293	759.1									1.1277
	487	412	298	763.1									0.649297
	493	415	310	763.6									0.555555
	503	416	311	770.5
	505	426	312	776.7
	508	432	318	782
	510	439	318	791.3
	510	442	320	796
	515	442	323	804.2
	516	443	324	806
	523	443	327	808
	526	447	329	808
	534	452	332	813.6
	545	453	341	820
	548	456	341	845
	550	459	352	846.2
	554	460	354	880.5
	559	463	354	884
	560	465	361	889
	565	468	364	892
	566	470	366	901
	568	476	368	912
	576	477	369	926.7
	599	480	370	927
	602	484	371	931
	604	488	380	940
	608	489	382	940
	611	490	384	942
	618	493	384	963
	618	503	391	968
	630	513	392	968
	641	515	403	976.2
	644	531	404	1021
	665	537	405	1022
	705	544	408	1039
	706	547	413	1041
	713	550	415	1052
	716	550	423	1073
	723	559	428	1086.4
	723	571	429	1096
	724	571	441	1106
	725	580	442	1108
	727	580	445	1133
	729	583	450	1141
	736	585	451	1156
	752	589	456	1181
	769	592	456	1191.4
	772	601	457	1222
	778	601	459	1242
	804	608	460	1282
	805	612	462	1288
	806	616	468	1316
	807	617	474	1353
	816	619	476	1353
	819	646	494	1354
	820	651	495	1354
	826	651	497	1358
	827	671	498	1371
	835	674	501	1381.6
	835	678	506	1428
	842	679	509	1430.7
	843	683	518	1452
	848	684	528	1454
	851	686	531	1482
	858	698	536	1483
	858	698	545	1483
	866	725	547	1517
	873	726	557	1526
	880	731	566	1579
	888	742	568	1597
	889	756	571	1610
	896	758	578	1626
	899	760	580	1630
	900	764	582	1650
	911	771	582	1683
	912	774	595	1699
	921	777	596	1726
	924	793	598	1744
	941	803	601	1753
	955	805	603	1773
	957	810	603	1784
	959	824	613	1805
	963	848	631	1848
	998	850	635	1876
	1001	851	637	1909
	1009	865	656	1936
	1011	888	658	1965
	1012	890	679	1982
	1025	896	689	1984
	1025	896	689	1990
	1037	900	708	2036
	1039	921	710	2050
	1041	944	712	2057.6
	1042	946	716	2084
	1046	962	719	2085
	1052	965	728	2095
	1082	966	732	2112
	1101	969	741	2121
	1115	971	745	2136
	1133	975	751	2142
	1142	978	768	2147
	1147	1001	772	2149
	1154	1009	774	2152
	1161	1016	790	2168
	1163	1022	793	2210
	1164	1044	803	2231
	1190	1062	816	2249
	1193	1069	824	2301
	1194	1086	843	2307
	1202	1087	844	2310.5
	1208	1087	846	2348
	1232	1099	869	2351
	1242	1106	870	2391
	1242	1118	878	2420
	1247	1127	889	2464
	1259	1133	908	2471
	1281	1135	956	2491
	1285	1164	957	2526
	1316	1176	963	2533
	1322	1177	991	2544
	1323	1204	1000	2549.1
	1323	1215	1012	2551.6
	1334	1225	1023	2575
	1340	1251	1071	2605
	1348	1263	1076	2706
	1361	1266	1088	2788
	1361	1267	1092	2791
	1361	1268	1114	2834
	1372	1292	1117	2853
	1374	1292	1130	2871
	1384	1317	1132	2886
	1387	1320	1135	2888
	1387	1321	1192	2903
	1390	1344	1199	2909
	1401	1350	1238	2927
	1408	1366	1246	2931
	1425	1384	1253	2944
	1439	1409	1265	3043
	1445	1411	1273	3098
	1445	1431	1297	3102
	1472	1435	1308	3185
	1481	1450	1315	3187
	1516	1450	1317	3194
	1533	1455	1321	3223
	1537	1501	1364	3226
	1554	1504	1373	3236
	1564	1555	1411	3243
	1569	1556	1444	3270
	1569	1560	1448	3380
	1571	1560	1484	3381
	1587	1560	1486	3403
	1588	1565	1494	3454
	1595	1580	1521	3454
	1628	1592	1560	3455
	1628	1650	1575	3505
	1635	1687	1575	3567
	1658	1742	1586	3578
	1696	1762	1588	3697
	1712	1801	1606	3712
	1714	1827	1632	3739
	1724	1835	1701	3750
	1742	1871	1704	3770
	1747	1899	1720	3844
	1747	1903	1755	3861
	1755	1933	1764	3874
	1757	1954	1773	3886
	1763	1957	1838	4022
	1779	1982	1939	4071
	1787	1994	1941	4120
	1806	2000	2015	4143
	1808	2013	2018	4154
	1810	2029	2067	4155
	1818	2035	2164	4233
	1831	2041	2246	4335
	1839	2051	2249	4345
	1868	2071	2490	4371
	1875	2088	2516	4402
	1884	2110	2609	4501
	1887	2112	2633	4553
	1911	2115	2682	4590
	1913	2155	2687	4600
	1929	2170	2696	4606
	1931	2171	2770	4642
	1936	2171	2800	4695
	1936	2173	2810	4751
	1947	2184	2873	4813
	1963	2193	2930	4824
	2008	2206	2988	4885
	2025	2219	3050	4978
	2030	2254	3112	5031
	2034	2299	3148	5068
	2035	2306	3185	5100
	2047	2369	3314	5131
	2125	2396	3316	5160
	2143	2459	3364	5192
	2143	2459	3376	5195
	2146	2523	3487	5237
	2155	2526	3567	5288
	2200	2540	3669	5415
	2205	2599	3707	5418
	2218	2606	3710	5474
	2219	2630	3870	5516
	2236	2652	3914	5564
	2246	2665	4077	5768
	2266	2673	4274	5775
	2274	2682	4440	5927
	2371	2864	4770	5963
	2395	2878	4989	5993
	2430	2903	5019	6052
	2459	2918	5078	6088
	2460	2940	5405	6182
	2702	3001	5405	6186
	2703	3470	5982	6368
	2731	3555	6122
	2744	3556	6356
	2804	3765	6436
	2841	3837	6500
	2871	3964	6835
	2941	4104
	2958	4120
	3055	4289
	3180	4691
	3613	4994
	4022	5409

## Sheet: WT 14
	WT1	WT2	WT3
	211	127	138											Mean	Mean	SEM	SEM
	228	146	146			n	194	250	393					WT	A7	WT	A7
	253	160	224			count	WT1	WT2	WT3	T	SEM		>500	5.56611	25.4905	2.64447	4.94313
	265	174	335			>500	7	27	9	14.3333	6.35959		500-1000	12.1497	29.0635	3.45233	0.550571
	335	213	348			500-1000	14	47	41	34	10.1489		1000-1500	12.5484	14.4794	4.27269	1.83407
	348	224	365			1000-1500	8	45	61	38	15.695		1500-2000	11.2999	10.0238	3.62456	0.678558
	472	241	378			1500-2000	8	35	62	35	15.5885		2000-2500	9.74094	7.12969	2.30681	1.45368
	526	253	454			2000-2500	10	29	49	29.3333	11.2596		2500-3000	12.118	4.79116	0.424117	1.68893
	568	285	489			2500-3000	22	32	48	34	7.57188		3000-3500	8.62538	3.78632	1.27738	1.0637
	578	294	504			3000-3500	21	16	34	23.6667	5.36449		3500-4000	6.35596	1.89298	1.63144	0.110385
	582	316	506			3500-4000	14	8	34	18.6667	7.85988		4000-4500	3.4753	1.78224	1.17985	0.296081
	604	335	546			4000-4500	10	3	16	9.66667	3.75648		4500-5000	4.03581	0.334077	2.4166	0.000371609
	611	341	546			4500-5000	17	2	10	9.66667	4.33333		5000-5500	3.60953	0.557414	2.33618	0.557414
	655	365	546			5000-5500	16	2	7	8.33333	4.09607		5500-6000	2.70628	0.222965	2.00532	0.111483
	688	365	577			5500-6000	13	1	4	6	3.60555		>6000	7.63531	0.445931	5.0642	0.445931
	713	372	588			>6000	34	2	18	18	9.2376
	715	378	603
	749	384	637			percent	WT1	WT2	WT3	T	SEM
	765	413	652			>500	3.60825	10.8	2.29008	5.56611	2.64447
	893	429	694			500-1000	7.21649	18.8	10.4326	12.1497	3.45233
	943	429	735			1000-1500	4.12371	18	15.5216	12.5484	4.27269
	1033	443	748			1500-2000	4.12371	14	15.7761	11.2999	3.62456
	1115	454	756			2000-2500	5.15464	11.6	12.4682	9.74094	2.30681
	1172	455	773			2500-3000	11.3402	12.8	12.2137	12.118	0.424117
	1173	462	799			3000-3500	10.8247	6.4	8.6514	8.62538	1.27738
	1239	472	802			3500-4000	7.21649	3.2	8.6514	6.35596	1.63144
	1300	489	802			4000-4500	5.15464	1.2	4.07125	3.4753	1.17985
	1339	504	803			4500-5000	8.76289	0.8	2.54453	4.03581	2.4166
	1434	544	837			5000-5500	8.24742	0.8	1.78117	3.60953	2.33618
	1582	546	853			5500-6000	6.70103	0.4	1.01781	2.70628	2.00532
	1586	553	854			>6000	17.5258	0.8	4.58015	7.63531	5.0642
	1658	574	862
	1696	577	876
	1697	588	877			n	300	299	299
	1753	604	886			count	A71	A72	A73
	1859	618	892			>500	105	69	55
	1891	637	897			500-1000	90	87	84
	2139	644	905			1000-1500	36	54	40
	2148	646	909			1500-2000	26	32	32
	2153	674	909			2000-2500	14	21	29
	2167	682	920			2500-3000	7	12	24
	2220	693	926			3000-3500	11	6	17
	2221	708	940			3500-4000	6	6	5
	2298	719	947			4000-4500	4	5	7
	2367	721	957			4500-5000	1	1	1
	2399	725	961			5000-5500	0	5	0
	2454	730	965			5500-6000	0	1	1
	2523	738	969			>6000	0	0	4
	2539	760	970
	2546	773	972
	2580	775	1001			percent	A71	A72	A73	T	SEM
	2608	785	1009			>500	35	23.0769	18.3946	25.4905	4.94313
	2633	802	1012			500-1000	30	29.097	28.0936	29.0635	0.550571
	2633	803	1014			1000-1500	12	18.0602	13.3779	14.4794	1.83407
	2645	810	1021			1500-2000	8.66667	10.7023	10.7023	10.0238	0.678558
	2652	814	1025			2000-2500	4.66667	7.02341	9.699	7.12969	1.45368
	2666	824	1074			2500-3000	2.33333	4.01338	8.02676	4.79116	1.68893
	2666	828	1083			3000-3500	3.66667	2.00669	5.68562	3.78632	1.0637
	2677	838	1099			3500-4000	2	2.00669	1.67224	1.89298	0.110385
	2702	844	1132			4000-4500	1.33333	1.67224	2.34114	1.78224	0.296081
	2732	845	1136			4500-5000	0.333333	0.334448	0.334448	0.334077	0.000371609
	2791	858	1143			5000-5500	0	1.67224	0	0.557414	0.557414
	2807	876	1156			5500-6000	0	0.334448	0.334448	0.222965	0.111483
	2813	888	1156			>6000	0	0	1.33779	0.445931	0.445931
	2899	892	1161
	2922	897	1172
	2955	897	1173
	2995	906	1181
	2995	920	1183
	3069	920	1192
	3125	926	1204
	3134	947	1211
	3164	959	1227
	3175	981	1257
	3185	1001	1267
	3240	1011	1272
	3305	1036	1280
	3331	1041	1281
	3357	1043	1287
	3358	1067	1288
	3381	1073	1292
	3394	1083	1298
	3407	1107	1299
	3423	1109	1302
	3428	1143	1303
	3451	1145	1309
	3456	1150	1330
	3460	1159	1332
	3464	1161	1349
	3487	1172	1355
	3500	1179	1356
	3546	1181	1359
	3574	1183	1360
	3582	1192	1361
	3691	1192	1362
	3702	1197	1364
	3705	1204	1370
	3714	1284	1374
	3821	1292	1388
	3833	1302	1395
	3873	1303	1397
	3889	1308	1401
	3949	1322	1419
	3989	1338	1422
	4192	1349	1436
	4205	1354	1464
	4313	1355	1466
	4327	1370	1466
	4368	1374	1469
	4368	1395	1469
	4387	1400	1487
	4387	1419	1512
	4398	1442	1520
	4422	1448	1526
	4517	1454	1534
	4645	1466	1547
	4645	1469	1549
	4655	1485	1556
	4662	1487	1585
	4671	1514	1597
	4698	1526	1619
	4708	1534	1657
	4725	1538	1658
	4728	1539	1666
	4774	1556	1676
	4799	1562	1678
	4883	1584	1681
	4911	1597	1692
	4918	1604	1702
	4972	1605	1708
	4975	1620	1716
	5012	1638	1717
	5016	1647	1726
	5060	1649	1731
	5082	1678	1732
	5181	1681	1736
	5198	1702	1754
	5215	1731	1757
	5250	1747	1783
	5267	1754	1795
	5280	1757	1798
	5338	1771	1811
	5351	1821	1813
	5403	1830	1815
	5442	1832	1817
	5458	1836	1821
	5473	1852	1825
	5531	1866	1833
	5546	1897	1834
	5549	1924	1836
	5565	1927	1839
	5654	1967	1843
	5672	1980	1848
	5728	1980	1855
	5814	2012	1855
	5874	2047	1856
	5875	2049	1866
	5893	2056	1873
	5896	2063	1897
	5898	2077	1898
	6021	2099	1909
	6104	2105	1919
	6108	2117	1927
	6139	2117	1935
	6158	2143	1942
	6201	2171	1946
	6222	2178	1948
	6285	2216	1975
	6323	2251	1980
	6385	2316	1980
	6456	2318	1980
	6456	2327	1988
	6675	2342	1995
	6755	2370	2008
	6798	2395	2009
	6806	2410	2025
	6813	2413	1642.99
	6873	2442	2046
	6876	2450	2047
	6890	2475	2049
	6908	2480	2056
	7029	2481	2063
	7117	2495	2085
	7129	2500	2097
	7161	2509	2099
	7204	2513	2099
	7207	2518	2112
	7270	2523	2119
	7417	2523	2129
	7512	2524	2143
	7606	2525	2157
	7622	2530	2167
	7773	2531	2172
	7865	2531	2178
		2560	2179
		2563	2180
		2567	2194
		2586	2196
		2614	2224
		2651	2251
		2657	2277
		2662	2279
		2673	2309
		2676	2323
		2681	2342
		2726	2350
		2766	2353
		2785	2358
		2812	2359
		2826	2378
		2827	2395
		2853	2410
		2911	2417
		2921	2437
		2922	2437
		2961	2442
		3066	2461
		3072	2480
		3097	2481
		3109	2483
		3149	2485
		3169	2488
		3192	2507
		3201	2509
		3233	2513
		3329	2518
		3354	2523
		3368	2523
		3378	2524
		3415	2528
		3454	2530
		3470	2535
		3538	2560
		3621	2567
		3673	2569
		3790	2583
		3798	2586
		3798	2586
		3811	2596
		3873	2600
		4041	2611
		4320	2614
		4483	2651
		4758	2657
		4928	2673
		5034	2687
		5109	2710
		5955	2714
		6335	2726
		6507	2747
			2761
			2796
			2799
			2799
			2807
			2827
			2836
			2867
			2881
			2901
			2905
			2909
			2918
			2919
			2938
			2955
			2959
			2961
			2981
			2982
			3012
			3044
			3045
			3060
			3066
			3072
			3091
			3118
			3140
			3143
			3164
			3169
			3232
			3233
			3247
			3251
			3260
			3274
			3320
			3327
			3334
			3335
			3343
			3349
			3378
			3391
			3392
			3415
			3455
			3467
			3467
			3470
			3478
			3483
			3502
			3518
			3541
			3560
			3567
			3603
			3621
			3650
			3650
			3665
			3679
			3687
			3718
			3730
			3787
			3790
			3798
			3811
			3818
			3823
			3824
			3835
			3837
			3838
			3841
			3873
			3887
			3914
			3938
			3960
			3963
			3964
			3968
			3990
			4012
			4041
			4058
			4103
			4184
			4320
			4323
			4327
			4344
			4352
			4377
			4400
			4430
			4443
			4454
			4471
			4508
			4576
			4666
			4697
			4742
			4801
			4895
			4918
			4928
			4929
			5001
			5034
			5034
			5109
			5110
			5158
			5426
			5515
			5755
			5902
			5955
			6038
			6105
			6218
			6263
			6275
			6335
			6348
			6353
			6420
			6473
			6507
			6665
			6697
			6701
			6758
			6780
			6787
			6861

## Sheet: A7- 14
	A71	A72	A73		n	300	299	299
	29		45		count	A71	A72	A73
	60	88	71		>500	105	69	55
	67	104	82		500-1000	90	87	84
	88	113	104		1000-1500	36	54	40
	97	146	110		1500-2000	26	32	32
	99	152	138		2000-2500	14	21	29
	110	160	141		2500-3000	7	12	24
	118	160	141		3000-3500	11	6	17
	119	161	143		3500-4000	6	6	5
	129	170	147		4000-4500	4	5	7
	134	186	165		4500-5000	1	1	1
	134	187	176		5000-5500	0	5	0
	135	214	183		5500-6000	0	1	1
	142	223	187		>6000	0	0	4
	144	225	188
	147	232	190
	152	233	193		percent	A71	A72	A73	T	SEM
	153	236	209		>500	35	23.0769	18.3946	25.4905	4.94313
	159	246	210		500-1000	30	29.097	28.0936	29.0635	0.550571
	164	256	218		1000-1500	12	18.0602	13.3779	14.4794	1.83407
	167	260	221		1500-2000	8.66667	10.7023	10.7023	10.0238	0.678558
	172	273	224		2000-2500	4.66667	7.02341	9.699	7.12969	1.45368
	186	278	225		2500-3000	2.33333	4.01338	8.02676	4.79116	1.68893
	194	278	231		3000-3500	3.66667	2.00669	5.68562	3.78632	1.0637
	195	282	235		3500-4000	2	2.00669	1.67224	1.89298	0.110385
	205	288	269		4000-4500	1.33333	1.67224	2.34114	1.78224	0.296081
	207	293	306		4500-5000	0.333333	0.334448	0.334448	0.334077	0.000371609
	210	295	307		5000-5500	0	1.67224	0	0.557414	0.557414
	212	304	309		5500-6000	0	0.334448	0.334448	0.222965	0.111483
	213	304	310		>6000	0	0	1.33779	0.445931	0.445931
	214	307	312
	215	326	317
	220	338	320
	234	345	321
	243	345	345
	243	348	345
	251	350	368
	261	366	374
	268	370	376
	278	383	385
	282	384	385
	284	387	400
	288	391	411
	291	408	416
	292	410	426
	294	413	427
	297	414	428
	298	415	438
	300	419	439
	302	419	455
	309	433	463
	311	433	475
	312	434	481
	314	438	484
	316	439	499
	331	442	502
	331	461	513
	333	467	514
	335	469	517
	341	479	517
	345	480	518
	345	481	522
	345	482	530
	351	487	530
	354	488	531
	357	491	533
	358	491	548
	363	493	552
	365	494	553
	369	498	565
	376	521	565
	377	550	570
	379	551	571
	381	554	572
	381	555	574
	382	563	605
	382	566	606
	383	567	611
	383	568	612
	384	572	613
	393	575	614
	399	586	615
	405	592	615
	407	594	620
	414	598	623
	421	598	629
	421	599	636
	422	604	644
	422	611	662
	424	627	662
	433	628	666
	436	635	669
	439	640	673
	443	647	692
	448	648	707
	452	651	712
	457	653	725
	469	661	725
	470	664	733
	470	664	738
	474	669	744
	491	689	749
	493	689	758
	494	692	760
	499	694	761
	500	696	762
	501	696	766
	514	696	769
	520	707	770
	521	713	774
	521	716	777
	530	717	794
	537	717	805
	539	718	817
	539	724	823
	544	726	846
	551	741	847
	554	748	849
	554	752	853
	557	757	854
	569	759	855
	571	759	864
	576	764	870
	580	769	873
	597	777	875
	616	778	879
	619	781	881
	624	787	883
	632	816	893
	635	818	900
	644	820	906
	660	822	912
	661	823	920
	667	830	936
	680	833	962
	681	834	965
	698	845	988
	709	859	989
	715	859	668
	716	864	1006
	730	875	1016
	741	879	1019
	746	885	1042
	746	893	1042
	749	901	1043
	749	903	1063
	750	907	1091
	757	916	1095
	758	918	1102
	758	929	1134
	759	930	1143
	775	933	1155
	776	936	1170
	778	969	1175
	778	970	1179
	778	971	1184
	785	974	1216
	789	1012	1233
	794	1013	1238
	796	1014	1269
	796	1021	1294
	801	1022	1299
	804	1023	1305
	813	1023	1309
	817	1035	1310
	818	1039	1317
	821	1044	1320
	822	1046	1361
	823	1050	1365
	831	1067	1380
	833	1083	1396
	833	1085	1396
	838	1094	1399
	839	1095	1421
	843	1126	1426
	849	1126	1448
	849	1127	1463
	858	1138	1472
	892	1151	1479
	906	1161	1503
	907	1164	1544
	908	1179	1546
	915	1189	1566
	933	1201	1568
	936	1211	1580
	947	1230	1600
	950	1273	1609
	962	1279	1621
	969	1294	1657
	970	1307	1663
	973	1324	1667
	974	1351	1679
	980	1352	1679
	985	1353	1696
	986	1377	1712
	1004	1385	1718
	1021	1401	1741
	1031	1401	1750
	1050	1402	1767
	1050	1403	1768
	1057	1413	1769
	1104	1414	1773
	1114	1422	1855
	1126	1433	1861
	1127	1436	1881
	1138	1448	1900
	1144	1463	1936
	1145	1467	1972
	1150	1483	1982
	1171	1486	1987
	1171	1495	1993
	1182	1506	2003
	1206	1506	2012
	1232	1507	2012
	1272	1507	2052
	1278	1563	2057
	1279	1622	2058
	1286	1622	2060
	1294	1669	2080
	1307	1678	2090
	1311	1679	2093
	1351	1725	2099
	1364	1732	2105
	1369	1752	2111
	1385	1769	2113
	1430	1795	2156
	1448	1800	2165
	1449	1810	2169
	1467	1815	2178
	1479	1843	2182
	1489	1847	2194
	1501	1855	2203
	1506	1858	2215
	1516	1865	2219
	1530	1871	2286
	1535	1875	2321
	1555	1921	2394
	1563	1945	2410
	1622	1947	2428
	1639	1952	2497
	1669	1959	2504
	1688	1999	2504
	1710	1999	2538
	1714	2017	2571
	1719	2044	2574
	1774	2047	2589
	1795	2055	2602
	1821	2103	2617
	1823	2126	2641
	1875	2140	2641
	1905	2146	2652
	1909	2151	2661
	1909	2187	2683
	1914	2208	2690
	1941	2211	2729
	1959	2284	2749
	1978	2298	2803
	2006	2335	2873
	2056	2346	2917
	2057	2353	2924
	2061	2355	2929
	2103	2382	2931
	2127	2446	2971
	2169	2460	2987
	2187	2530	3007
	2196	2545	3065
	2258	2618	3069
	2336	2639	3090
	2397	2664	3095
	2484	2675	3116
	2487	2692	3142
	2538	2864	3169
	2626	2889	3192
	2806	2892	3217
	2892	2941	3255
	2894	2984	3256
	2894	3016	3290
	2912	3085	3343
	3061	3114	3350
	3084	3114	3423
	3089	3187	3454
	3101	3466	3526
	3103	3586	3658
	3114	3644	3660
	3162	3722	3747
	3207	3825	3781
	3302	3851	4012
	3341	3904	4018
	3350	4034	4027
	3547	4058	4034
	3565	4064	4035
	3589	4275	4323
	3716	4466	4496
	3748	4625	4954
	3863	5232	5943
	4044	5234	6058
	4127	5296	6379
	4416	5387	6787
	4452	5450	7500
	5001	6178

## Sheet: WT 28
	WT 28 #1	WT 28 #2	WT 28 #3
	487	423	180
	558	501	239		count	1	2	3
	605	509	240		<500	1	1	8
	616	514	285		500-1000	31	16	12
	622	582	410		1000-1500	30	23	39
	627	613	459		1500-2000	43	35	56
	628	720	482		2000-2500	32	31	29
	632	778	485		2500-3000	28	27	28
	652	781	522		3000-3500	25	22	23
	665	790	552		3500-4000	19	29	18
	671	805	555		4000-4500	14	19	12
	710	858	556		4500-5000	14	18	7
	743	926	601		5000-5500	10	12	8
	776	954	639		5500-6000	14	15	5
	792	954	722		>6000	11	20	8
	802	979	735			272	268	253
	802	981	745
	814	1006	752
	826	1017	771		percent	1	2	3			WT mean	A7- mean
	835	1072	782		<500	0.367647	0.373134	3.16206		<500	1.30095	9.75778
	876	1076	785		500-1000	11.3971	5.97015	4.74308		500-1000	7.3701	19.9593
	897	1098	799		1000-1500	11.0294	8.58209	15.415		1000-1500	11.6755	18.1985
	899	1098	809		1500-2000	15.8088	13.0597	22.1344		1500-2000	17.001	14.2283
	900	1103	810		2000-2500	11.7647	11.5672	11.4625		2000-2500	11.5981	9.20514
	915	1113	810		2500-3000	10.2941	10.0746	11.0672		2500-3000	10.4786	8.39661
	920	1121	820		3000-3500	9.19118	8.20896	9.09091		3000-3500	8.83035	4.31888
	952	1137	856		3500-4000	6.98529	10.8209	7.11462		3500-4000	8.30694	4.55229
	956	1161	865		4000-4500	5.14706	7.08955	4.74308		4000-4500	5.6599	2.73652
	962	1182	880		4500-5000	5.14706	6.71642	2.7668		4500-5000	4.87676	3.18577
	967	1235	886		5000-5500	3.67647	4.47761	3.16206		5000-5500	3.77205	2.38816
	975	1246	916		5500-6000	5.14706	5.59701	1.97628		5500-6000	4.24012	1.47716
	997	1319	967		>6000	4.04412	7.46269	3.16206		>6000	4.88962	1.59561
	1014	1322	974
	1021	1339	991								SEM	SEM
	1060	1349	1000								0.930556	2.259
	1064	1397	1001								2.0444	3.75038
	1068	1404	1021								1.99878	1.72561
	1078	1408	1022								2.6866	1.87452
	1094	1448	1055								0.0886146	1.0887
	1094	1471	1067								0.301018	1.03811
	1099	1500	1085								0.312041	0.984735
	1124	1501	1113								1.25753	1.12491
	1144	1520	1137								0.724277	0.869851
	1158	1528	1143								1.14814	0.989443
	1169	1565	1154								0.382763	0.784024
	1214	1577	1166								1.13935	0.298214
	1233	1579	1180								1.31149	0.634696
	1315	1586	1233
	1328	1590	1247
	1342	1631	1253
	1352	1657	1262
	1362	1679	1262
	1373	1689	1263
	1383	1692	1270
	1384	1723	1289
	1384	1731	1300
	1391	1737	1312
	1400	1740	1314
	1404	1740	1346
	1446	1740	1367
	1453	1757	1396
	1496	1761	1406
	1501	1771	1418			25
	1508	1776	1430
	1519	1784	1439
	1541	1793	1440
	1542	1813	1448
	1567	1835	1455
	1572	1908	1460
	1585	1913	1472
	1586	1918	1477
	1587	1948	1484
	1598	1976	1498
	1622	1982	1525
	1675	1991	1527
	1693	2017	1527
	1697	2018	1528
	1698	2018	1529
	1699	2018	1530
	1700	2023	1535
	1720	2040	1541
	1722	2070	1544
	1734	2073	1546
	1741	2174	1548
	1752	2176	1549
	1774	2182	1560
	1777	2185	1569
	1777	2202	1571
	1805	2217	1574
	1807	2243	1584
	1810	2263	1587
	1810	2265	1593
	1819	2272	1593
	1823	2298	1594
	1825	2313	1597
	1843	2314	1614
	1850	2325	1636
	1875	2355	1640
	1900	2393	1642
	1912	2400	1649
	1913	2412	1651
	1914	2444	1663
	1916	2458	1673
	1918	2465	1674
	1981	2476	1678
	2013	2494	1703
	2032	2500	1714
	2056	2529.4	1728
	2069	2530	1728
	2081	2539	1730
	2110	2563	1730
	2112	2581	1732
	2114	2612	1765
	2118	2613	1798
	2130	2616	1800
	2134	2620	1813
	2192	2673	1825
	2198	2683	1848
	2203	2702	1860
	2217	2724	1861
	2223	2778	1865
	2227	2810	1876
	2280	2832	1880
	2290	2840	1903
	2336	2845	1910
	2357	2858	1934
	2373	2869	1943
	2374	2900	1978
	2381	2903	1992
	2386	2927	2003
	2389	2949	2024
	2391	2973	2025
	2450	2982	2051
	2452	3010	2052
	2466	3062	2110
	2487	3082	2118
	2490	3083	2119
	2507	3106	2124
	2510	3133	2143
	2517	3169	2175
	2520	3218	2175
	2548	3243	2182
	2577	3253	2185
	2581	3254	2185
	2595	3256	2223
	2627	3276	2234
	2631	3323	2260
	2643	3325	2277
	2643	3364	2277
	2660	3375	2312
	2662	3379	2348
	2666	3441	2361
	2667	3453	2370
	2676	3490	2383
	2767	3498	2389
	2795	3519	2430
	2807	3533	2431
	2832	3544	2451
	2865	3560	2530
	2913	3610	2531
	2915	3622	2534
	2918	3638	2540
	2966	3641	2574
	2987	3670	2575
	2987	3678	2575
	3015	3682	2575
	3025	3706	2579
	3038	3711	2597
	3044	3719	2613
	3057	3740	2648
	3073	3741	2648
	3082	3774	2648
	3084	3801	2686
	3092	3832	2708
	3094	3839	2737
	3123	3843	2787
	3126	3846	2802
	3177	3864	2808
	3188	3873	2809
	3236	3882	2889
	3241	3960	2891
	3247	3989	2902
	3252	3991	2911
	3252	3999	2931
	3319	4050	2955
	3343	4072	2972
	3365	4083	3005
	3402	4106	3010
	3450	4140	3043
	3485	4150	3066
	3500	4171	3097
	3515	4178	3102
	3526	4181	3130
	3546	4185	3139
	3615	4207	3152
	3649	4216	3179
	3672	4226	3191
	3708	4243	3217
	3737	4288	3219
	3783	4311	3224
	3824	4345	3268
	3838	4465	3286
	3843	4480	3315
	3844	4511	3330
	3852	4524	3356
	3945	4554	3367
	3956	4561	3369
	3980	4675	3446
	3997	4709	3462
	4017	4765	3541
	4024	4771	3562
	4050	4773	3569
	4120	4783	3591
	4124	4849	3604
	4133	4868	3669
	4186	4882	3672
	4215	4947	3676
	4226	4956	3685
	4288	4956	3709
	4331	4963	3711
	4339	4996	3742
	4366	5004	3747
	4369	5012	3754
	4534	5056	3880
	4556	5116	3900
	4685	5156	3923
	4689	5189	3986
	4690	5233	4014
	4695	5338	4169
	4727	5360	4211
	4865	5366	4223
	4945	5389	4252
	4950	5493	4252
	4970	5527	4265
	4980	5606	4265
	4980	5607	4278
	4980	5656	4372
	5146	5672	4437
	5157	5689	4467
	5166	5690	4602
	5196	5700	4610
	5277	5780	4641
	5310	5827	4673
	5376	5889	4733
	5380	5920	4842
	5389	5949	4984
	5480	5971	5019
	5501	5981	5022
	5523	6009	5028
	5579	6009	5225
	5615	6034	5256
	5709	6051	5370
	5739	6105	5467
	5818	6116	5482
	5827	6127	5540
	5853	6175	5605
	5912	6211	5647
	5932	6223	5885
	5952	6289	5893
	5964	6514	6338
	5988	6532	6424
	6033	6543	6549
	6079	6556	6826
	6107	6576	6907
	6311	6678	7243
	6427	6734	8404
	6495	6782	8631
	6527	6934	9000
	6673	7012	10220
	6815	7154
	6820	7215
	6910	7269
	6980	7379
	6986	7540
		7804
		7828
		7883
		7915
		7997
		8009
		8284
		8330
		8339
		8437
		8478
		8520
		8527
		8618
		8639
		8829
		9258
		9303
		9398
		9813
		9964
		10333
		10779
		10941
		11039
		12689
		13365
Sample mean	2851.73	3857.07	2527.1
Sample SEM	99.5136	138.734	100.059
Total mean	3106.8
Total SEM	69.8771

## Sheet: A7- 28
	A71 28 #1	A7- 28 #2	A7- 28 #3
	54	215	21
	145	245	105
	158	263	122		count	1	2	3
	159	286	144		<500	42	24	20
	160	294	144		500-1000	81	44	51
	166	296	194		1000-1500	56	60	44
	170	299	230		1500-2000	41	51	33
	172	322	256		2000-2500	22	26	33
	178	338	259		2500-3000	25	19	30
	189	356	273		3000-3500	8	12	18
	189	385	280		3500-4000	7	15	18
	210	400	313		4000-4500	3	11	10
	216	401	322		4500-5000	4	10	14
	250	404	349		5000-5500	3	7	11
	257	410	424		5500-6000	3	4	6
	274	421	444		>6000	1	6	7
	286	426	459			296	289	295
	299	434	481
	301	444	484
	330	445	485		percent	1	2	3			A7- mean
	330	461	495		<500	14.1892	8.3045	6.77966		<500	9.75778
	333	470	510		500-1000	27.3649	15.2249	17.2881		500-1000	19.9593
	348	488	534		1000-1500	18.9189	20.7612	14.9153		1000-1500	18.1985
	354	499	544		1500-2000	13.8514	17.6471	11.1864		1500-2000	14.2283
	356	513	569		2000-2500	7.43243	8.99654	11.1864		2000-2500	9.20514
	382	526	582		2500-3000	8.44595	6.57439	10.1695		2500-3000	8.39661
	397	539	582		3000-3500	2.7027	4.15225	6.10169		3000-3500	4.31888
	399	563	587		3500-4000	2.36486	5.19031	6.10169		3500-4000	4.55229
	401	565	593		4000-4500	1.01351	3.80623	3.38983		4000-4500	2.73652
	403	566	603		4500-5000	1.35135	3.46021	4.74576		4500-5000	3.18577
	403	583	603		5000-5500	1.01351	2.42215	3.72881		5000-5500	2.38816
	407	590	610		5500-6000	1.01351	1.38408	2.0339		5500-6000	1.47716
	416	594	616		>6000	0.337838	2.07612	2.37288		>6000	1.59561
	418	631	633
	418	696	635								SEM
	450	697	639								2.259
	463	702	645								3.75038
	465	706	655								1.72561
	465	715	657								1.87452
	475	724	663								1.0887
	491	727	663								1.03811
	496	736	664								0.984735
	500	741	671								1.12491
	500	742	674								0.869851
	508	745	678								0.989443
	511	749	707								0.784024
	516	758	714								0.298214
	525	774	742								0.634696
	529	806	744
	535	816	758
	541	822	764
	551	847	766
	561	851	779
	566	854	779
	570	886	799
	575	887	805
	581	894	819
	599	895	834
	612	905	843
	626	948	852
	626	964	860
	640	965	890
	654	975	900
	665	976	942
	665	978	964
	689	990	973
	699	997	980
	701	999	982
	703	1002	983
	707	1013	987
	709	1017	995
	716	1047	995
	730	1052	1023
	732	1069	1031
	738	1074	1035
	740	1088	1047
	743	1089	1049
	744	1090	1061
	744	1092	1061
	755	1103	1066
	759	1104	1067
	759	1115	1088
	760	1123	1129
	760	1135	1139
	763	1158	1157
	764	1167	1159
	770	1190	1174
	770	1191	1175
	771	1207	1184
	781	1210	1220
	783	1211	1271
	785	1221	1280
	795	1234	1312
	796	1234	1316
	799	1235	1337
	809	1238	1337
	811	1258	1342
	811	1265	1349
	811	1265	1351
	815	1271	1354
	828	1283	1367
	832	1283	1384
	844	1294	1389
	844	1303	1400
	846	1316	1412
	846	1324	1418
	851	1326	1430
	851	1344	1447
	854	1346	1457
	860	1354	1463
	870	1374	1464
	872	1390	1465
	884	1393	1490
	895	1403	1490
	908	1404	1492
	910	1417	1494
	912	1422	1509
	924	1427	1523
	929	1429	1527
	930	1433	1532
	930	1434	1544
	953	1435	1554
	971	1439	1555
	1000	1448	1582
	1004	1450	1583
	1006	1461	1589
	1011	1469	1605
	1038	1477	1623
	1058	1500	1628
	1073	1501	1714
	1099	1514	1728
	1100	1525	1754
	1118	1534	1756
	1150	1535	1757
	1159	1535	1759
	1161	1540	1759
	1174	1541	1760
	1177	1553	1765
	1177	1562	1767
	1192	1572	1788
	1194	1588	1799
	1196	1618	1812
	1199	1626	1887
	1223	1628	1887
	1235	1655	1930
	1238	1657	1937
	1240	1658	1939
	1243	1673	1953
	1246	1677	1984
	1250	1687	2005
	1256	1724	2046
	1261	1729	2051
	1272	1731	2071
	1273	1750	2104
	1285	1752	2128
	1286	1762	2139
	1295	1770	2142
	1303	1773	2158
	1304	1786	2161
	1308	1790	2164
	1316	1800	2166
	1316	1804	2181
	1330	1809	2183
	1344	1826	2183
	1353	1841	2206
	1363	1861	2210
	1381	1863	2235
	1381	1867	2251
	1396	1891	2252
	1401	1910	2259
	1404	1918	2277
	1409	1922	2282
	1414	1923	2290
	1448	1923	2314
	1451	1929	2339
	1462	1933	2361
	1476	1970	2383
	1483	1983	2389
	1495	1995	2392
	1526	2012	2416
	1534	2039	2435
	1547	2040	2435
	1548	2073	2513
	1550	2098	2526
	1561	2102	2530
	1580	2121	2535
	1584	2174	2537
	1588	2190	2556
	1591	2217	2562
	1598	2222	2613
	1614	2241	2653
	1615	2254	2676
	1628	2266	2683
	1634	2282	2688
	1643	2312	2748
	1643	2317	2750
	1645	2341	2752
	1656	2361	2785
	1682	2377	2826
	1692	2395	2826
	1700	2399	2834
	1702	2421	2841
	1712	2422	2849
	1736	2435	2909
	1757	2483	2930
	1760	2550	2946
	1785	2610	2954
	1790	2612	2954
	1820	2646	2972
	1867	2649	2979
	1868	2657	2988
	1883	2662	2988
	1896	2712	3017
	1900	2757	3040
	1911	2786	3072
	1924	2804	3079
	1979	2809	3081
	1992	2847	3091
	1993	2849	3120
	1997	2878	3124
	2013	2931	3146
	2062	2933	3187
	2071	2947	3262
	2121	2982	3263
	2121	3017	3334
	2160	3053	3337
	2160	3069	3386
	2166	3134	3411
	2171	3173	3470
	2175	3218	3488
	2175	3225	3516
	2190	3249	3557
	2205	3286	3563
	2237	3422	3670
	2245	3480	3688
	2334	3483	3709
	2380	3579	3741
	2382	3581	3784
	2403	3647	3807
	2409	3680	3810
	2421	3685	3821
	2422	3706	3833
	2507	3730	3878
	2531	3752	3879
	2537	3755	3903
	2550	3782	3907
	2570	3823	3942
	2583	3831	3992
	2614	3872	4039
	2638	3943	4056
	2640	3944	4090
	2640	4066	4115
	2641	4087	4184
	2665	4116	4255
	2696	4116	4339
	2696	4116	4356
	2717	4175	4403
	2759	4217	4456
	2785	4406	4528
	2785	4446	4593
	2786	4476	4678
	2803	4480	4743
	2834	4514	4745
	2874	4521	4770
	2881	4642	4825
	2955	4706	4835
	2993	4706	4835
	2994	4714	4868
	3009	4727	4885
	3040	4802	4913
	3040	4862	4915
	3045	4967	4934
	3101	5088	5071
	3123	5148	5073
	3222	5212	5115
	3243	5317	5186
	3643	5348	5249
	3737	5364	5279
	3792	5397	5309
	3794	5743	5321
	3867	5749	5336
	3963	5840	5349
	3982	5888	5415
	4045	6075	5513
	4224	6244	5577
	4261	6297	5686
	4564	6342	5691
	4846	6888	5714
	4957	6933	5881
	4973	7029	6072
	5375	7069	6074
	5405	7290	6207
	5437	7317	6268
	5596	7317	6630
	5727	8241	6677
	5742	8447	6858
	6433	8671	7737
	6627	8823	7777
	6986	9351	8103
	8268	14229	8729
Sample mean	1596.92	2333.51	2392.97
Sample SEM	75.5908	111.122	98.4587
Total mean	2107.8
Total SEM	56.7713

[truncated: 1 more sheets: For averages]
