# Supplementary material for: EphA7 promotes myogenic differentiation via cell-cell contact
Source: eLife. 2020 Apr 21;9:e53689. doi: 10.7554/eLife.53689 (PMC7173967; doi:10.7554/eLife.53689)
Supplement: Figure 6—source data 1. [file elife-53689-fig6-data1.xlsx]

## Sheet: Sheet 1
	A	% positive			B	% positive			C	% positive			D	% positive				E	% positive
	Slide	WT	EphA7 null		Slide	WT	EphA7 null		Slide	WT	EphA7 null		Coverslip	WT	EphA7 null			Coverslip	WT	EphA7 null
	1	100	94.5		1	77	83		1	6.16438	0		1	96.7742	85.7143			1	58.1	46.2
	2	94	84		2	68	79		2	7.96857	1.25		2	81.25	80			2	69.4	29.5
	3	84	100		3	99	78		3	10.5215	0.57		3	97.7273	57.1429			3	74	26.9
	4	90.9			4	99							4	83.3333	68.1818			4	69	23.1
													5	76.5957	72			5	67.1	16.1
	mean	92.225	92.833		mean	86	78.5		mean	8.21817	0.606667
	sem	2.883	3.832		sem	6.81	0.288		sem	1.03203	0.360844		mean	87.1361	72.6078			mean	67.5	28.4
													sem	4.77802	6.361			sem	2.91522	5.57673
A	Mann-Whitney t test (non parametric)				B	Mann-Whitney t test (non parametric)			C	Mann-Whitney t test (non parametric)
	significant?	NO				significant?	NO			significant?	YES (****)							Mann-Whitney t test (non parametric)
	P value	0.8571				P value	>0.9999			P value	<0.0001			Mann-Whitney t test (non parametric)				significant?	YES (**)
														significant?	NO			P value	0.0079
														P value	0.1905
