# Supplementary material for: EphA7 promotes myogenic differentiation via cell-cell contact
Source: eLife. 2020 Apr 21;9:e53689. doi: 10.7554/eLife.53689 (PMC7173967; doi:10.7554/eLife.53689)
Supplement: Figure 8—source data 1. [file elife-53689-fig8-data1.xlsx]

## Sheet: 8C
LOW DENSITY
Coverslip	1	2	3	4	5	6	7	8	9	10	11	12	13	14	15	16	17	18	19	20		MEAN	SEM
Unedited laminin	0	0	0	8	0	0	1.5	0	0	0	0	0	0	0	0							0.633333	0.554358
Unedited EphA7-Fc	11.1	5.9	32.3	32.5	34.4	14.3	10.3	14.7	10.9	4.8	25.6	6.1	5	27.3	4.3	30						16.8438	2.90055
EphA7KO laminin	0	0	0	0	0	0	0	0	0	0	0	0	1	0	0							0.0666667	0.0690066
EphA7KO EphA7-Fc	6	14.5	6.7	7.3	10.9	2.4	35.6	35.4	6.9	12.9	16.7	10	0	13.3	4.8	21.4						12.8	2.708
ephrin-A5KO laminin	0	0	0	0	0	0	0	0	0	0	0	0	0	0	0	0	0	0	0	0		0	0
ephrin-A5KO EphA7-Fc	0	0	0	0	0	0	0	0	0	0	0	0	0	0	0	0	0	0	0	0		0	0
HIGH DENSITY
Coverslip	1	2	3	4	5	6	7	8	9	10	11	12	13	14	15	16	17	18	19	20		MEAN	SEM
Unedited laminin	22	13	14.5	16.8	10.6	18	9.6	19.4	12.1	13.5	6.4	19.8	9.5	17.2	8.3							14.0467	1.2523
Unedited EphA7-Fc	39.9	39.3	35	36.1	21.8	33.8	34.4	33.9	33.2	47.3	28.9	24.6	42	31.8	35.6	38.3	48.9	36.1	37.6	30.5		35.45	1.47257
EphA7KO laminin	0.7	3.2	2.6	2.6	0.3	1.7	4.5	3.7	1.1	2.1	3.6	1.6	3.6	1.1	1.7	0.4	2.6	0.8	0.8	0.6		1.965	0.286601
EphA7KO EphA7-Fc	11.8	5.2	6.6	8.4	8.5	6	16.2	5.3	7.9	5.9	9.2	10.2	7.7	9.5	9.5	6.5	5.1	6.5	7.4	6.8		8.01	0.655541
ephrin-A5KO laminin	0	0	0	0	0	0	0	0	0	0	0	0	0	0	0	0	0	0	0			0	0
ephrin-A5KO EphA7-Fc	0	0	0	0	0	0	0	0	0	0	0	0	0	0	0	0	0	0	0			0	0
LOW DENSITY	MEAN	SEM
Unedited laminin	0.633333	0.554358
Unedited EphA7-Fc	16.8438	2.90055
EphA7KO laminin	0.0666667	0.0690066
EphA7KO EphA7-Fc	12.8	2.708
ephrin-A5KO laminin	0	0
ephrin-A5KO EphA7-Fc	0	0
HIGH DENSITY
Unedited laminin	14.0467	1.2523
Unedited EphA7-Fc	35.45	1.47257
EphA7KO laminin	1.965	0.286601					low, laminin	high, laminin	low, EphA7-Fc	high, EphA7-Fc
EphA7KO EphA7-Fc	8.01	0.655541				WT	0.633333	14.0467	16.8438	35.45
ephrin-A5KO laminin	0	0				EphA7KO	0.0666667	1.965	12.8	8.01
ephrin-A5KO EphA7-Fc	0	0				ephrin-A5KO	0	0	0	0
							0.554358	1.2523	2.90055	1.47257
							0.0690066	0.286601	2.708	0.655541
							0	0	0	0
high v low within samples					control v treated within samples					cell line v cell line within treatment
WT control:Low density vs. WT control:High density	Yes	****	<0.0001	HIGH	WT control vs. WT EphA7-Fc	Yes	****	<0.0001	HIGH	WT control vs. EphA7KO control	Yes	****	<0.0001
WT EphA7-Fc:Low density vs. WT EphA7-Fc:High density	Yes	****	<0.0001		EphA7KO control vs. EphA7KO EphA7-Fc	Yes	**	0.0091		WT control vs. ephrin-A5KO control	Yes	****	<0.0001
EphA7KO control:Low density vs. EphA7KO control:High density	No	ns	>0.9999		ephrin-A5KO control vs. ephrin-A5KO EphA7-Fc:	No	ns	>0.9999		EphA7KO control vs. ephrin-A5KO control	No	ns	>0.9999
EphA7KO EphA7-Fc:Low density vs. EphA7KO EphA7-Fc:High density	No	ns	0.2375							WT EphA7-Fc vs. EphA7KO EphA7-Fc	Yes	****	<0.0001
ephrin-A5KO control:Low density vs. ephrin-A5KO control:High density	No	ns	>0.9999	LOW	WT control vs. WT EphA7-Fc	Yes	****	<0.0001		WT EphA7-Fc vs. ephrin-A5KO EphA7-Fc	Yes	****	<0.0001
ephrin-A5KO EphA7-Fc:Low density vs. ephrin-A5KO EphA7-Fc:High density	No	ns	>0.9999		EphA7KO control vs. EphA7KO EphA7-Fc	Yes	****	<0.0001		EphA7KO EphA7-Fc vs. ephrin-A5KO EphA7-Fc	Yes	****	<0.0001
					ephrin-A5KO control vs. ephrin-A5KO EphA7-Fc	No	ns	>0.9999
									LOW	WT control vs. EphA7KO control	No	ns	>0.9999
										WT control vs. ephrin-A5KO control	No	ns	>0.9999
										EphA7KO control vs. ephrin-A5KO control	No	ns	>0.9999
										WT EphA7-Fc vs. EphA7KO EphA7-Fc	No	ns	0.7543
										WT EphA7-Fc vs. ephrin-A5KO EphA7-Fc	Yes	****	<0.0001
										EphA7KO EphA7-Fc vs. ephrin-A5KO EphA7-Fc	Yes	****	<0.0001

## Sheet: 8D
	Unedited	EphA7KO	ephrin-A5KO
expression normalized on IP90 and adjusted for control	109.2		47	exp1
	159.5	59.6	54.7	exp2
	184.567	240.111	78.5503	exp3
		140.1		exp4
	Unedited	EphA7KO	ephrin-A5KO
	151.089	146.604	60.0834
	27.1395	63.9443	11.6317
	Unedited stim	Unedited ctrl	a7ko stim	a7ko ctrl	a5ko stim	a5ko ctrl
expression normalized on IP90	117.673	8.49095			50.3387	3.3619
adjusted for control	109.182				46.9768
	Unedited stim	Unedited ctrl	a7ko stim	a7ko ctrl	a5ko stim	a5ko ctrl
expression normalized on IP90	198.228	38.7595	172.648	113.034	72.6032	17.9244
adjusted for control	159.469		59.6148		54.6788
	Unedited stim	Unedited ctrl	a7ko stim	a7ko ctrl	a5ko stim	a5ko ctrl
expression normalized on IP90	216.85	32.2835	278.81	38.699	112.136	33.5862
adjusted for control	184.567		240.111		78.5503
	Unedited stim	Unedited ctrl	a7ko stim	a7ko ctrl	a5ko stim	a5ko ctrl
expression normalized on IP90			303.8	163.707
adjusted for control			140.093
